# Supplementary material
Source: PubMed Central journal article supplement (PMC3820938)
Supplement: supp_M112.025460_mcp.M112.025460-4.pdf [file supp_M112.025460_mcp.M112.025460-4.pdf]

**Figure S4**

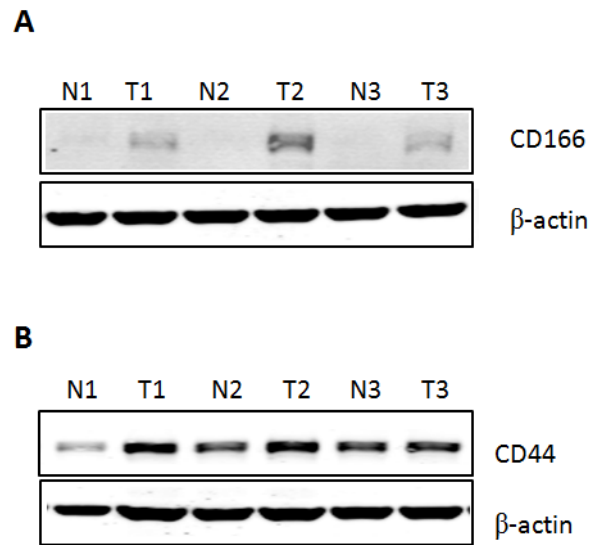

**Figure S4. Expression of CD166 and CD44 in three pairs of normal mucosa and HNSCC tissues.** The proteins were extracted from 3 pairs of normal mucosa and HNSCC tissues. The expression of CD166 (A) and CD44 (B) were analyzed by western blot. (N normal mucosa; T tumor)
