# Supplementary material
Source: PubMed Central journal article supplement (PMC3820938)
Supplement: supp_M112.025460_mcp.M112.025460-5.pdf [file supp_M112.025460_mcp.M112.025460-5.pdf]

**Table S1. MS/MS database search parameters and the threshold scores**

| <b>Parameters</b>                     | <b>Value</b>                                           |
|---------------------------------------|--------------------------------------------------------|
| peaklist software                     | Spectrum Mill MS proteomics Workbench(Rev B.03.03.084) |
| Instrument                            | Agilent ESI ion trap                                   |
| MH+                                   | 600-4000                                               |
| Merge scans with same precursor m/z   | $\pm 15$ sec $\pm 1.4$ m/s                             |
| Digest                                | trypsin                                                |
| Maximum # missed cleavages            | 2                                                      |
| Fixed Modifications                   | Carbamidomethylation                                   |
| Variable Modifications                | Oxidized methionine (M); Pyroglutamic acid (N-termQ)   |
| Masses are                            | Monoisotopic                                           |
| Precursor mass tolerance              | $\pm 2.5$ Da                                           |
| Product mass tolerance                | $\pm 0.7$                                              |
| Database                              | Swissprot.human.      Swissprot.human.reverse          |
| Species                               | All                                                    |
| Search mode                           | Variable modifications                                 |
| Precursor mass shift range            | -18.0 to 177.0 Da                                      |
| Autovaildate after search             | Yes                                                    |
| Group proteins across all directories | Yes                                                    |
| Sort proteins by                      | Score                                                  |
| Filter by protein score               | >11.0                                                  |
| Filter peptides by Score              | >6                                                     |
| Filter peptides by %SPI               | >60.0                                                  |
| PROTEINS $\geq 1$ Peptide             | $\geq 1$ Peptide                                       |
