# Supplementary material
Source: PubMed Central journal article supplement (PMC3820938)
Supplement: supp_M112.025460_mcp.M112.025460-7.pdf [file supp_M112.025460_mcp.M112.025460-7.pdf]

**Table S3** *In vivo* tumorigenicity of the spheres and the adherent HNSCC cells in nude mice.

|       |          | Tumor formation ratio |                 |                 |
|-------|----------|-----------------------|-----------------|-----------------|
|       |          | 10 <sup>5</sup>       | 10 <sup>4</sup> | 10 <sup>3</sup> |
| CAL27 | spheres  | 6/6                   | 6/6             | 5/6             |
|       | adherent | 1/6                   | 1/6             | 1/6             |
| HN13  | spheres  | 6/6                   | 4/6             | 2/6             |
|       | adherent | 1/6                   | 0/6             | 0/6             |
