# Supplementary material
Source: PubMed Central journal article supplement (PMC3820938)
Supplement: supp_M112.025460_mcp.M112.025460-8.pdf [file supp_M112.025460_mcp.M112.025460-8.pdf]

**Table S4 List of plasma membrane proteins which were identified in HNSCC spheres or adherent cultured cells identified by LC MS/MS**

| % AA<br>Coverage | Mean<br>Peptide<br>Spectral<br>Intensity | Protein ID | symbol      | sphere | Sequence of Sphere                                             | adherent | Sequence of adherent                                                                          | Type(s)     | membrane prediction total Score |
|------------------|------------------------------------------|------------|-------------|--------|----------------------------------------------------------------|----------|-----------------------------------------------------------------------------------------------|-------------|---------------------------------|
| 3                | 2.78E+08                                 | A5A3E0     | POTEE/POTEF | 2      | (R)TTGIVMDSGDGVTHTVPIYEGYALPHAILR(L)<br>(K)SYELPDGQVITIGNER(F) | 3        | (R)TTGIVMDSGDGVTHTVPIYEGYALPHAILR(L)<br>(K)SYELPDGQVITIGNER(F)<br>(K)DLYANTVLSGGTTMYPGIADR(M) | other       | 1                               |
| 4                | 4.42E+06                                 | O00148     | DDX39A      | 2      | (K)GLAITFVSDENDAK(I)<br>(R)DVQEIFR(L)                          | 0        |                                                                                               | enzyme      | 0                               |
| 3                | 5.35E+06                                 | O00410     | IPO5        | 2      | (K)SLVEIADTVPK(Y)<br>(R)LLSSAFDEVYPALPSDVQTAIK(S)              | 0        |                                                                                               | transporter | 0                               |
| 3                | 1.48E+06                                 | O00571     | DDX3X       | 2      | (K)TAAFLLPILSQIYSDGPGEALR(A)<br>(K)PLPPSERLEQELFSGGNTGINF(E)   | 2        | (K)TAAFLLPILSQIYSDGPGEALR(A)<br>(K)PLPPSERLEQELFSGGNTGINF(E)                                  | enzyme      | 0                               |
| 13               | 2.79E+06                                 | O14744     | PRMT5       | 4      | (K)ADIIVSELLGSFADNELSPEcLDGAQHFLK(D)                           | 0        |                                                                                               | enzyme      | 0                               |

|    |          |        |              |   |                                                                                                                                                                                                                            |   |                                                                 |             |   |
|----|----------|--------|--------------|---|----------------------------------------------------------------------------------------------------------------------------------------------------------------------------------------------------------------------------|---|-----------------------------------------------------------------|-------------|---|
|    |          |        |              |   | (K)AAILPTSIFLTNK(K)<br>(K)DDGVSIPIGEYTSFLAPISSSK(L)<br>(R)DDIENAPTTHTEEYSGEEK(T)                                                                                                                                           |   |                                                                 |             |   |
| 7  | 1.32E+06 | O14773 | TPP1         | 2 | (R)VPIPWVSGTSASTPVFGGILSLINEHR(I)<br>(R)AYPDVAALSDGYWVWSNR(V)                                                                                                                                                              | 1 | (R)VPIPWVSGTSASTPVFGGILSLINEHR(I)                               | peptidase   | 0 |
| 7  | 1.42E+06 | O14929 | HAT1         | 2 | (R)LLVTDmSDAEQYR(S)<br>(R)YYTEFPTVLDTAEDPSK(S)                                                                                                                                                                             | 0 |                                                                 | enzyme      | 0 |
| 13 | 2.78E+06 | O14980 | XPO1         | 8 | (K)LVLDSIIWAFK(H)<br>(K)LDINLLDNVVNcLYHGEGAQQR(M)<br>(K)YYGLQILENVIK(T)<br>(R)SNDPQMVAENFVPPLDDAVLIDYQR(N)<br>(K)LNMLVQILK(Q)<br>(R)ETLMEALHYMLLVSEVEETEIFK(I)<br>(R)TNFFLLLQAVNSHcFPAFLAIPPTQFK(L)<br>(R)FLNWIPLGIFETK(L) | 2 | (K)LDINLLDNVVNcLYHGEGAQQR(M)<br>(R)SNDPQMVAENFVPPLDDAVLIDYQR(N) | transporter | 0 |
| 2  | 1.66E+06 | O15031 | PLXNB2       | 4 | (K)GTLQQFVDNFFQSVLAPGHAVPPAVK(Y)<br>(K)LQLEQQVATGPALDNK(K)<br>(K)SQLEGLEESVR(D)<br>(R)LFYEDGSGEK(S)                                                                                                                        | 2 | (K)LQLEQQVATGPALDNK(K)<br>(R)LFYEDGSGEK(S)                      | other       | 3 |
| 2  | 7.63E+05 | O15085 | ARHGEF1<br>1 | 3 | (R)TLGLGSLYGENDLLDLDGDPLR(E)<br>(K)DIWNIFLEK(N)<br>(R)NSVLSDPGLDSPR(T)                                                                                                                                                     | 0 |                                                                 | other       | 2 |

|    |          |        |         |   |                                                                                                                 |   |                                                                                                                                                                                                                       |             |   |
|----|----------|--------|---------|---|-----------------------------------------------------------------------------------------------------------------|---|-----------------------------------------------------------------------------------------------------------------------------------------------------------------------------------------------------------------------|-------------|---|
| 13 | 3.68E+06 | O15355 | PPM1G   | 4 | (R)GTEAGQVGEPGIPTGEAGPScSSASDK(L)<br>(K)NLPPEEQMISALPDIK(V)<br>(K)ELAQIAGRPTEDDEK(E)<br>(K)EEPGSDSGTTAVVALIR(G) | 0 |                                                                                                                                                                                                                       | phosphatase | 0 |
| 7  | 2.31E+06 | O43242 | PSMD3   | 2 | (K)AKPPPGGGEQPPPPAPQDVEK(E)<br>(K)SVFPEQANNNEWAR(Y)                                                             | 0 |                                                                                                                                                                                                                       | other       | 0 |
| 8  | 3.80E+06 | O43390 | HNRNPR  | 4 | (R)NLATTVTEEILEK(S)<br>(R)DLYEDELVPLFEK(A)<br>(R)EFNEEGALSVLQQFK(E)<br>(R)LMMDP LSGQNR(G)                       | 8 | (K)AGPIWDLR(L)<br>(K)VWGNVVTVEWADPVEEPDPEVMAK(V)<br>(K)YGGPPPPDSVYSGVQPGIGTEVFVGK(I)<br>(R)DLYEDELVPLFEK(A)<br>(R)EFNEEGALSVLQQFK(E)<br>(R)KYGGPPPPDSVYSGVQPGIGTEVFVGK(I)<br>(R)LmmDPLSGQNR(G)<br>(R)NLATTVTEEILEK(S) | other       | 0 |
| 2  | 2.62E+06 | O43491 | EPB41L2 | 2 | (R)GLSPAQADSQFLENAK(R)<br>(K)EPTQAVVEEQVLDK(E)                                                                  | 0 |                                                                                                                                                                                                                       | other       | 3 |
| 11 | 9.98E+06 | O43707 | ACTN4   | 7 | (K)mLDAEDIVNTARPDEK(A)<br>(K)VLAQNENEQLmEDYEK(L)<br>(R)ETTD TADQVIASF(V)<br>(R)KDDPVTNLNNAFEVAEK(Y)             | 0 |                                                                                                                                                                                                                       | other       | 0 |

|    |          |        |              |   |                                                                                                                                                                                                                                                 |   |                                                          |        |   |
|----|----------|--------|--------------|---|-------------------------------------------------------------------------------------------------------------------------------------------------------------------------------------------------------------------------------------------------|---|----------------------------------------------------------|--------|---|
|    |          |        |              |   | (R)mAPYQGPDAVPGALDYK(S)<br>(R)TINEVENQILTR(D)<br>(R)VEQIAAIAQELNELDYDPSVNR(C)                                                                                                                                                                   |   |                                                          |        |   |
| 4  | 3.88E+06 | O60502 | MGEA5        | 2 | (K)LLPGIEVLWTGPK(V)<br>(K)GVLTPNPcEFEANYVAIHTLATWYK(S)                                                                                                                                                                                          | 0 |                                                          | enzyme | 0 |
| 7  | 2.96E+07 | O60812 | HNRNPCL<br>1 | 2 | (K)SDVEAIFSK(Y)<br>(K)QKVDSLLENLEK(I)                                                                                                                                                                                                           | 0 |                                                          | other  | 0 |
| 11 | 2.94E+06 | O75367 | H2AFY        | 2 | (K)AASADSTTEGTPADGFTVLSTK(S)<br>(K)GVTIASGGVLPNIHPELLAK(K)                                                                                                                                                                                      | 2 | (K)GVTIASGGVLPNIHPELLAK(K)<br>(R)HILLAVANDEELNQLLK(G)    | other  | 0 |
| 4  | 8.14E+05 | O75390 | CS           | 2 | (R)ALGVLAQLIWSR(A)<br>(R)DYIWNTLNSGR(V)                                                                                                                                                                                                         | 0 |                                                          | enzyme | 0 |
| 4  | 1.98E+06 | O75533 | SF3B1        | 3 | (R)EFGAGPLFNQILPLMSPTLEDQER(H)<br>(K)LLVDVDESTLSPEEQK(E)<br>(R)AFAVVASALGIPSLPFLK(A)                                                                                                                                                            | 2 | (R)EFGAGPLFNQILPLMSPTLEDQER(H)<br>(K)LLVDVDESTLSPEEQK(E) | other  | 0 |
| 7  | 3.68E+06 | O75643 | SNRNP20<br>0 | 9 | (R)WTELGALDILQMLGR(A)<br>(R)GLIEISNAAEYENIPIR(H)<br>(K)YPPPTELLDLQPLPVSALR(N)<br>(K)GLFYFDNSFRPVPLEQTYVGITEK(K)<br>(R)NSAFESLYQDK(F)<br>(K)YAQDEHLITFFVPVFEPLPPQYFIR(V)<br>(R)LTAIDILTTCADIQR(Q)<br>(K)TGNFQVTELGR(I)<br>(R)EEEVTPGVIAPLFPQK(R) | 2 | (K)TGNFQVTELGR(I)<br>(K)LPDMLNAEIVLGNVQNAK(D)            | enzyme | 0 |

|    |          |        |       |   |                                                                                                                                                                                                         |   |                                                     |             |   |
|----|----------|--------|-------|---|---------------------------------------------------------------------------------------------------------------------------------------------------------------------------------------------------------|---|-----------------------------------------------------|-------------|---|
| 9  | 4.98E+06 | P00367 | GLUD1 | 3 | (K)GFIGPGIDVPAPDmSTGER(E)<br>(K)HGGTIPIVPTAEFQDR(I)<br>(K)IIAEGANGPTTPEADK(I)                                                                                                                           | 2 | (R)DSNYHLLMSVQESLER(K)<br>(K)GFIGPGIDVPAPDMSTGER(E) | enzyme      | 0 |
| 11 | 1.85E+07 | P00533 | EGFR  | 8 | (R)GDSFTHTPPLDPQELDILK(T)<br>(K)TIQEVAGYVLIALNTVER(I)<br>(R)ELVEPLTPSGEAPNQALLR(I)<br>(R)IPLNLQIIR(G)<br>(K)EISDGDVIISGNK(N)<br>(K)GSTAENAEYLR(V)<br>(K)EILDEAYVMASVDNPHVcR(L)<br>(R)AcGADSYEMEEDGVR(K) | 2 | (R)NGLQScPIKEDSFLQR(Y)<br>(R)NLQEILHGAVR(F)         | kinase      | 5 |
| 12 | 3.89E+06 | P02545 | LMNA  | 5 | (R)MQQQQLDEYQELLDIK(L)<br>(R)NSNLVGAAHEELQQSR(I)<br>(R)ITESEEVVSR(E)<br>(K)AGQVVTIWAAGAGATHSPPTDLVWK(A)<br>(R)TALINSTGEEVAMR(K)                                                                         | 2 | (R)mMQQQQLDEYQELLDIK(L)<br>(R)NSNLVGAAHEELQQSR(I)   | other       | 1 |
| 3  | 1.23E+07 | P02786 | TFRC  | 4 | (R)SAFSNLFGGEP LSYTR(F)<br>(R)YNSQLLSFVR(D)<br>(K)VSASPLLYTLIEK(T)<br>(K)KLNDRVMRV(E)                                                                                                                   | 2 | (R)SAFSNLFGGEP LSYTR(F)<br>(K)VSASPLLYTLIEK(T)      | transporter | 4 |
| 4  | 1.65E+06 | P04844 | RPN2  | 4 | (K)TGQEVVFVAEPDNK(N)                                                                                                                                                                                    | 2 | (R)LQVTNVLSQPLTQATVK(L)                             | enzyme      | 3 |

|    |          |        |        |   |                                                                                                                                                                                                            |   |                                                                           |             |   |
|----|----------|--------|--------|---|------------------------------------------------------------------------------------------------------------------------------------------------------------------------------------------------------------|---|---------------------------------------------------------------------------|-------------|---|
|    |          |        |        |   | (R)LQVTNVLSQPLTQATVK(L)<br>(K)TSFTPVGDFVFL(N)<br>(K)TSFTPVGDFVFLNFmNVK(F)                                                                                                                                  |   | (K)TSFTPVGDFVFLNFmNVK(F)                                                  |             |   |
| 12 | 2.86E+07 | P05023 | ATP1A1 | 8 | (R)AVFQANQENLPILK(R)<br>(K)GVGIISEGNETVEDIAAR(L)<br>(K)DMTSEQLDDILK(Y)<br>(R)QGAIVAVTGDGVNDSPALK(K)<br>(R)LNIPVSQVNPR(D)<br>(R)SPDFTNENPLETR(N)<br>(K)EQPLDEELKDAFQAYLELGGLGER(V)<br>(K)VDNSSLTGESEPQTR(S) | 3 | (R)QGAIVAVTGDGVNDSPALK(K)<br>(K)DAFQAYLELGGLGER(V)<br>(R)SPDFTNENPLETR(N) | transporter | 4 |
| 11 | 4.05E+06 | P05165 | PCCA   | 5 | (R)LQVEHPVTEcITGLDLVQEMIR(V)<br>(R)VDSGIQPGSDISIYYDPMISK(L)<br>(K)VVEEAPSIFLDAETR(R)<br>(R)MPVIKPDIANWELSVK(L)<br>(R)IAWDDEETR(D)                                                                          | 0 |                                                                           | enzyme      | 0 |
| 14 | 1.27E+07 | P05166 | PCCB   | 5 | (K)SVTNEDVTQEELGGAK(T)<br>(K)AYNMVDIIHSVVDER(E)<br>(R)LVPELDTIVPLESTK(A)<br>(R)ISLLDPGSFVESDMFVEHR(C)<br>(K)LLYAFAEATVPK(V)                                                                                | 0 |                                                                           | enzyme      | 0 |
| 17 | 8.36E+06 | P06576 | ATP5B  | 6 | (K)TVLIMELINNVAK(A)<br>(R)DQEGQDVLLFIDNIFR(F)                                                                                                                                                              | 6 | (R)DQEGQDVLLFIDNIFR(F)<br>(K)TVLIMELINNVAK(A)                             | transporter | 2 |

|    |          |        |              |   |                                                                                                                      |   |                                                                                                                                                                                 |                            |   |
|----|----------|--------|--------------|---|----------------------------------------------------------------------------------------------------------------------|---|---------------------------------------------------------------------------------------------------------------------------------------------------------------------------------|----------------------------|---|
|    |          |        |              |   | (R)IPSAVGYQPTLATDMGTMQER(I)<br>(R)VALTGLTVAEYFR(D)<br>(R)AIAELGIYPAVDPLDSTSR(I)<br>(R)IMNVIGEPIDER(G)                |   | (R)AIAELGIYPAVDPLDSTSR(I)<br>(K)VALVYGQmNEPPGAR(A)<br>(R)LVLEVAQHLGESTVR(T)<br>(R)TIAmDGTEGLVR(G)                                                                               |                            |   |
| 7  | 6.96E+06 | P06733 | ENO1         | 2 | (K)FTASAGIQVVGDDLTVTNPK(R)<br>(K)LA mQEfmILPVGAANFR(E)                                                               | 0 |                                                                                                                                                                                 | transcription<br>regulator | 2 |
| 5  | 4.32E+06 | P06744 | GPI          | 2 | (K)ILLANFLAQTEALMR(G)<br>(K)TLAQLNPESLFIASK(T)                                                                       | 0 |                                                                                                                                                                                 | enzyme                     | 2 |
| 15 | 6.99E+06 | P07476 | IVL          | 4 | (K)GQLEQPVFAPAGQVQDIQPALPTK(G)<br>(K)HLEQQEGQLEQLEEQEGQLK(H)<br>(K)QEAQLELPEQVVGQPK(H)<br>(K)HLEQQEGQLEQLEEQEGQLK(H) | 0 |                                                                                                                                                                                 | other                      | 0 |
| 4  | 3.53E+06 | P07814 | EPRS         | 3 | (K)YNVYPTYDFAcPIVDSIEGVTHALR(T)<br>(K)TGQEYKPGNPPAEIGQNISSNSSASILESK(S)<br>(K)EVIPVNVPEAQEEMK(E)                     | 2 | (K)YNVYPTYDFAcPIVDSIEGVTHALR(T)<br>(R)NSEPAGLETPEAK(V)                                                                                                                          | enzyme                     | 0 |
| 29 | 5.29E+06 | P07900 | HSP90AA<br>1 | 0 |                                                                                                                      | 8 | (K)HGLEVIYMIPIDEYcVQQLK(E)<br>(K)HNDDEQYAWESSAGGSFTVR(T)<br>(K)LGLGIDEDDPTADDTSAAVTEEMPPLEGDDDTSR<br>(M)<br>(R)ELISNASDALDK(I)<br>(R)GVVDSIDLPLNISR(E)<br>(R)NPDDITNEEYGEFYK(S) | enzyme                     | 1 |

|    |          |        |        |   |                                                                                                                                                                                                                                                      |   |                                                                                                                                                                                                                                                            |             |   |
|----|----------|--------|--------|---|------------------------------------------------------------------------------------------------------------------------------------------------------------------------------------------------------------------------------------------------------|---|------------------------------------------------------------------------------------------------------------------------------------------------------------------------------------------------------------------------------------------------------------|-------------|---|
|    |          |        |        |   |                                                                                                                                                                                                                                                      |   | (R)VFI mDNCEELIPEYLN FIR(G)<br>(R)YYTSASGDEmVSLK(D)                                                                                                                                                                                                        |             |   |
| 15 | 2.16E+07 | P07910 | HNRNPC | 4 | (R)MIAGQVLDINLAAEPK(V)<br>(K)GFAFVQYVNER(N)<br>(K)SDVEAIFSK(Y)<br>(K)QKVDSLLENLEK(I)                                                                                                                                                                 | 1 | (R)MIAGQVLDINLAAEPK(V)                                                                                                                                                                                                                                     | other       | 0 |
| 5  | 2.77E+06 | P07954 | FH     | 2 | (K)VAALTGLPFVTAPNK(F)<br>(R)AAAEVNQDYGLDPK(I)                                                                                                                                                                                                        | 0 |                                                                                                                                                                                                                                                            | enzyme      | 0 |
| 25 | 5.66E+06 | P08107 |        | 8 | (K)AFYPEEISSMVLTK(M)<br>(K)ATAGDTHLGGEDFDNR(L)<br>(K)EIAEAYLGYPVTNAVITVPAYFNDSQR(Q)<br>(K)ELEQVcNPIISGLYQGAGGPGPGGFGAQGPK(G)<br>(K)NQVALNPQNTVFDAK(R)<br>(K)QTQIFTTYS DNQPGVLIQVYEGER(A)<br>(K)SINPDEAVAYGA AVQAAILmGDK(S)<br>(R)IINEPTAAAIAYGLDR(T) | 9 | (R)IINEPTAAAIAYGLDR(T)<br>(K)ATAGDTHLGGEDFDNR(L)<br>(K)ELEQVcNPIISGLYQGAGGPGPGGFGAQGPK(G)<br>(K)SINPDEAVAYGA AVQAAILmGDK(S)<br>(K)AFYPEEISSmVLTK(M)<br>(R)TTPSYVAFTDTER(L)<br>(K)EIAEAYLGYPVTNAVITVPAYFNDSQR(Q)<br>(K)FGDPVVQSDmK(H)<br>(K)DAGVIAGLNVLR(I) |             | 0 |
| 13 | 3.32E+06 | P08195 | SLC3A2 | 9 | (K)VAEDEAEAAAAAK(F)<br>(K)DDVAQTDLLQIDPNFGSK(E)<br>(K)GQSEDPGSLLSLFR(R)<br>(R)GENSWFSTQVDTVATK(V)                                                                                                                                                    | 3 | (K)DDVAQTDLLQIDPNFGSK(E)<br>(R)LLTSFLPAQLLR(L)<br>(K)EVELNELEPEK(Q)                                                                                                                                                                                        | transporter | 4 |

|    |          |        |              |    |                                                                                                                                                                                                                                              |   |                                                                                                                                                                                                  |        |   |
|----|----------|--------|--------------|----|----------------------------------------------------------------------------------------------------------------------------------------------------------------------------------------------------------------------------------------------|---|--------------------------------------------------------------------------------------------------------------------------------------------------------------------------------------------------|--------|---|
|    |          |        |              |    | (R)LLTSFLPAQLLR(L)<br>(K)DLLTSSYLSDSGSTGEHTK(S)<br>(K)ADLLSTQPGR(E)<br>(K)EVELNELEPEK(Q)<br>(K)EDFDSLLQSAK(K)                                                                                                                                |   |                                                                                                                                                                                                  |        |   |
| 25 | 7.48E+06 | P08238 | HSP90AB<br>1 | 0  |                                                                                                                                                                                                                                              | 7 | (K)HSQFIGYPITLYLEK(E)<br>(R)NPDDITQEEYGEFYK(S)<br>(K)LGLGIDEDEVAAEEPNAAVPDEIPPLEGDEDASR(M)<br>(R)VFIMDNcEELIPEYLNfir(G)<br>(R)GFEVVYmTEPIDEYcVQQLK(E)<br>(K)DQVANSafVER(L)<br>(R)ELISNSSDALDK(I) | enzyme | 0 |
| 30 | 3.48E+06 | P08670 | VIM          | 10 | (K)ILLAELEQLK(G)<br>(K)VELQELNDR(F)<br>(R)DGQVINETSQHHDdle(-)<br>(R)EEAENTLQSFR(Q)<br>(R)EmEENFAVEAANYQDTIGR(L)<br>(R)ETNLDslPLVDTHSK(R)<br>(R)ISLPLPNFSSLNLR(E)<br>(R)KVESLQEEIAFLK(K)<br>(R)LLQDSVDFSLADAINTEFK(N)<br>(R)SLYASSPGGVYATR(S) | 8 | (R)EmEENFAVEAANYQDTIGR(L)<br>(R)ISLPLPNFSSLNLR(E)<br>(K)FADLSEAANR(N)<br>(K)VELQELNDR(F)<br>(R)SLYASSPGGVYATR(S)<br>(R)ETNLDslPLVDTHSK(R)<br>(R)EEAENTLQSFR(Q)<br>(R)LGDLYEEEmR(E)               | other  | 1 |

|    |          |        |       |    |                                                                                                                                                                                                                                                                                             |   |                                                                                           |                          |   |
|----|----------|--------|-------|----|---------------------------------------------------------------------------------------------------------------------------------------------------------------------------------------------------------------------------------------------------------------------------------------------|---|-------------------------------------------------------------------------------------------|--------------------------|---|
| 6  | 4.42E+06 | P08727 | KRT19 | 2  | (R)SLLEGQEDHYNNLSASK(V)<br>(R)FGAQLAHIQALISGIEAQLGDVR(A)                                                                                                                                                                                                                                    | 0 |                                                                                           | other                    | 0 |
| 10 | 3.96E+07 | P08865 | RPSA  | 2  | (R)AIVAIENPADVSVISSR(N)<br>(R)FTPGTFTNQIAAFR(E)                                                                                                                                                                                                                                             | 0 |                                                                                           | translation<br>regulator | 2 |
| 17 | 2.31E+07 | P09874 | PARP1 | 11 | (R)VVSEDFLQDVSASTK(S)<br>(K)SANYCHTSQGDPIGLILLGEVALGNMYELK(H)<br>(K)SLQELFLAHILSPWGAEVK(A)<br>(K)NTHATTHNAYDLEVIDIFK(I)<br>(K)AQNDLIWNIK(D)<br>(R)TTNFAGILSQGLR(I)<br>(K)VFSATLGLVDIVK(G)<br>(K)FYPLEIDYGQDEEAVK(K)<br>(R)GGSDSSKDPIDVNYEK(L)<br>(R)IAPPEAPVTGYMFGK(G)<br>(K)TLGDFAAEYAK(S) | 0 |                                                                                           | enzyme                   | 0 |
| 7  | 8.98E+06 | P10515 | DLAT  | 3  | (K)GVETIANDVVSLATK(A)<br>(K)VPLPSLSPTMQAGTIAR(W)<br>(K)VPEANSSWMDTVIR(Q)                                                                                                                                                                                                                    | 0 |                                                                                           | enzyme                   | 0 |
| 1  | 5.79E+06 | P10586 | PTPRF | 2  | (R)VLAFTAVGDGPPSPTIQVK(T)<br>(R)YSIGGLSPFSEYAFR(V)                                                                                                                                                                                                                                          | 0 |                                                                                           | phosphatase              | 5 |
| 27 | 9.44E+06 | P10809 | HSPD1 | 9  | (R)ALMLQGVDLLADAVAVTmGPK(G)<br>(R)IQEIIEQLDVTTSEYEK(E)<br>(K)TLNDELEIIIEGmK(F)                                                                                                                                                                                                              | 9 | (R)IQEIIEQLDVTTSEYEK(E)<br>(R)ALMLQGVDLLADAVAVTMGPK(G)<br>(R)TALLDAAGVASLLTTAEVVVTEIPK(E) | enzyme                   | 0 |

|    |          |        |       |    |                                                                                                                                                                                                                                                                                                                                                                                                 |    |                                                                                                                                                                                                                                                                                                                                                                                                                             |        |   |
|----|----------|--------|-------|----|-------------------------------------------------------------------------------------------------------------------------------------------------------------------------------------------------------------------------------------------------------------------------------------------------------------------------------------------------------------------------------------------------|----|-----------------------------------------------------------------------------------------------------------------------------------------------------------------------------------------------------------------------------------------------------------------------------------------------------------------------------------------------------------------------------------------------------------------------------|--------|---|
|    |          |        |       |    | (R)TALLDAAGVASLLTTAEVVVEIPKEEK(D)<br>(K)LVQDVANNTNEEAGDGTATVLR(S)<br>(K)ISSIQSIVPALEIANHR(K)<br>(R)TALLDAAGVASLLTTAEVVVEIPK(E)<br>(R)KPLVIIAEDVDGEALSTLVNR(L)<br>(K)cEFQDAYVLLSEK(K)                                                                                                                                                                                                            |    | (K)TLNDELEIIEGmK(F)<br>(K)ISSIQSIVPALEIANHR(K)<br>(K)LVQDVANNTNEEAGDGTATVLR(S)<br>(R)TALLDAAGVASLLTTAEVVVEIPKEEK(D)<br>(K)VGGTSDVEVNEK(K)<br>(R)ciPALDSLTPANEDQK(I)                                                                                                                                                                                                                                                         |        |   |
| 30 | 1.81E+07 | P11021 | HSPA5 | 14 | (K)AFYPEEISSMVLTK(L)<br>(K)ATAGDTHLGGEDFDNR(L)<br>(K)DNHLLGTFDLTGIPPAPR(G)<br>(K)IEWLESHQDADIEDFK(A)<br>(K)LYGSAGPPPTGEEDTAEKDEL(-)<br>(K)NQLTSNPENTVFDAK(R)<br>(K)QTQIFTTYSNQPGLVLIQVYEGER(A)<br>(K)SFYPEEVSSMVLTK(M)<br>(K)SINPDEAVAYGA AVQAAILSGDK(S)<br>(K)SQIFSTASDNQPTVTIK(V)<br>(K)STAGDTHLGGEDFDNR(M)<br>(K)TVTNAVVTVPAYFNDSQR(Q)<br>(R)IEIESFYEGEDFSETLTR(A)<br>(R)IINEPTAAAIAYGLDK(R) | 18 | (K)AFYPEEISSMVLTK(L)<br>(K)ATAGDTHLGGEDFDNR(L)<br>(K)DAGTIAGLNVLR(I)<br>(K)DNHLLGTFDLTGIPPAPR(G)<br>(K)IEWLESHQDADIEDFK(A)<br>(K)LYGSAGPPPTGEEDTAEKDEL(-)<br>(K)MKETA EAYLGK(K)<br>(K)NQVAmNPTNTVFDAK(R)<br>(K)SDIDEIVLVGGSTR(I)<br>(K)SFYPEEVSSMVLTK(M)<br>(K)SINPDEAVAYGA AVQAAILmGDK(S)<br>(K)SQIFSTASDNQPTVTIK(V)<br>(K)SQIHDIVLVGGSTR(I)<br>(K)STAGDTHLGGEDFDNR(M)<br>(K)TFAPEEISAMVLTK(M)<br>(K)TVTNAVVTVPAYFNDSQR(Q) | enzyme | 0 |

|    |          |        |       |   |                                                                                                                                                                                                                                        |    |                                                                                                                                                                                                                                                                                                                           |        |   |
|----|----------|--------|-------|---|----------------------------------------------------------------------------------------------------------------------------------------------------------------------------------------------------------------------------------------|----|---------------------------------------------------------------------------------------------------------------------------------------------------------------------------------------------------------------------------------------------------------------------------------------------------------------------------|--------|---|
|    |          |        |       |   |                                                                                                                                                                                                                                        |    | (R)AKFEELNMDLFR(S)<br>(R)FDDAVVQSDmK(H)                                                                                                                                                                                                                                                                                   |        |   |
| 22 | 2.05E+07 | P11142 | HSPA8 | 9 | (K)DAGTIAGLNVLR(I)<br>(K)SFYPEEVSSmVLTk(M)<br>(K)SINPDEAVAYGAAVQAAILmGDK(S)<br>(K)SQIHDIVLVGGSTR(I)<br>(K)STAGDTHLGGEDFDNR(M)<br>(K)TVTNAVVTVPAYFNDSQR(Q)<br>(I)VLVGGSTRIPKIQ(K)<br>(R)LRTACERAKRTLSSS(T)<br>(K)GRLSKEDIERMVQEAKEYKAED | 12 | (K)DAGTIAGLNVLR(I)<br>(K)SFYPEEVSSmVLTk(M)<br>(K)SINPDEAVAYGAAVQAAILmGDK(S)<br>(K)SQIHDIVLVGGSTR(I)<br>(K)STAGDTHLGGEDFDNR(M)<br>(K)TVTNAVVTVPAYFNDSQR(Q)<br>(F)DNRMVNHFAIEFKRKHKK(D)<br>(L)SGDKSENVQDLLLLD(V)<br>(R)LRTACERAKRTLSSS(T)<br>(T)ITNDKGRLSKEDIERMVQEAKEYKAED<br>(I)VLVGGSTRIPKIQ(K)<br>(I)ANDQGNRTTPSYVAF(T) | enzyme | 1 |
| 12 | 1.25E+07 | P11498 | PC    | 8 | (K)AYVEANQMLGDLIK(V)<br>(R)SVVEFLQGYIGVPHGGFPEPFR(S)<br>(K)ASPSPTDPVVPAPVPIGPPAGFR(D)<br>(R)LDNASAFQGAVISPHYDSLIVK(V)<br>(K)DFTATFGPLDSLNR(L)<br>(R)GANAVGYTNYPDNVVK(F)<br>(K)ENNVDAVHPGYGFLSER(A)                                     | 2  | (K)ADEAYLIGR(G)<br>(K)ENNVDAVHPGYGFLSER(A)                                                                                                                                                                                                                                                                                | enzyme | 0 |

|    |          |        |        |    |                                                                                                                                                                                                                        |   |                                                                        |                          |   |
|----|----------|--------|--------|----|------------------------------------------------------------------------------------------------------------------------------------------------------------------------------------------------------------------------|---|------------------------------------------------------------------------|--------------------------|---|
|    |          |        |        |    | (K)YSLQYYMGLAEELVR(A)                                                                                                                                                                                                  |   |                                                                        |                          |   |
| 4  | 5.30E+06 | P11586 | MTHFD1 | 3  | (K)YVVVTGITPTPLGEGK(S)<br>(R)LDIDPETITWQR(V)<br>(K)TDPTTLTDEEINR(F)                                                                                                                                                    | 0 |                                                                        | enzyme                   | 0 |
| 4  | 9.40E+06 | P11940 | PABPC1 | 2  | (R)SLGYAYVNFQQPADAER(A)<br>(R)ALDTMNFDFVIK(G)                                                                                                                                                                          | 0 |                                                                        | translation<br>regulator | 0 |
| 11 | 5.09E+06 | P12532 |        | 2  | (R)GTGGVDTAATGGVDFISNLDL(R)<br>(K)TTPTGWTLDQcIQTGVDNPGHPFIK(T)                                                                                                                                                         | 0 |                                                                        |                          | 1 |
| 22 | 6.60E+06 | P12956 | XRCC6  | 8  | (R)NLEALALDLMEPEQAVDLTLPK(V)<br>(K)NIYVLQELDNPGAK(R)<br>(R)DIISIAEDEDLR(V)<br>(K)IQVTPPGFQLVFLPFADDK(R)<br>(R)SDSFENPVLQQHFR(N)<br>(R)TFNTSTGGLLLPSDTK(R)<br>(R)FDDPGLMLMGFKPLVLLK(K)<br>(K)TEGDEEAEEEEQEENLEASGDYK(Y) | 3 | (R)DSLIFLVDASK(A)<br>(K)IQVTPPGFQLVFLPFADDK(R)<br>(K)NIYVLQELDNPGAK(R) | enzyme                   | 0 |
| 21 | 2.47E+06 | P13010 | XRCC5  | 10 | (K)DKPSGDAAVFEEGGDVDDLDMI(-)<br>(K)DQVTAQEIFQDNHEDGPTAK(K)<br>(K)ETVYcLNDDDETEVLK(E)<br>(K)KYAPTEAQLNAVDALIDMSLAK(K)<br>(K)TDTLEDLFPTTK(I)<br>(K)TLFPLIEAK(K)<br>(K)YAPTEAQLNAVDALIDMSLAK(K)<br>(R)ANPQVGVAFFPHIK(H)   | 3 | (R)HMLLPDFDLLEDIESK(I)<br>(K)TDTLEDLFPTTK(I)<br>(K)ETVYcLNDDDETEVLK(E) | enzyme                   | 0 |

|    |          |        |        |    |                                                                                                                                                                                                                                                                                                                                                                                                                                                                                          |   |                                                                                                                                                                                           |                          |   |
|----|----------|--------|--------|----|------------------------------------------------------------------------------------------------------------------------------------------------------------------------------------------------------------------------------------------------------------------------------------------------------------------------------------------------------------------------------------------------------------------------------------------------------------------------------------------|---|-------------------------------------------------------------------------------------------------------------------------------------------------------------------------------------------|--------------------------|---|
|    |          |        |        |    | (R)EPLPPIQQHIWNMLNPPEVTTK(S)<br>(R)HLMLPDFDLLEDIESK(I)                                                                                                                                                                                                                                                                                                                                                                                                                                   |   |                                                                                                                                                                                           |                          |   |
| 4  | 1.34E+07 | P13591 | NCAM1  | 2  | (R)FIVLSNNYLQIR(G)<br>(K)EASMEGIVTIVGLKPETTYAVR(L)                                                                                                                                                                                                                                                                                                                                                                                                                                       | 0 |                                                                                                                                                                                           | other                    | 4 |
| 6  | 3.31E+07 | P13637 | ATP1A3 | 4  | (K)GVGIIEGNETVEDIAR(L)<br>(R)QGAIVAVTGDGVNDSPALK(K)<br>(R)LNIPVSQVNP(R)<br>(K)VDNSSLTGESEPTQTR(S)                                                                                                                                                                                                                                                                                                                                                                                        | 1 | (R)QGAIVAVTGDGVNDSPALK(K)                                                                                                                                                                 | transporter              | 4 |
| 25 | 7.61E+06 | P13639 | EEF2   | 14 | (R)LmEPIYLVEIQcPEQVVGGIYGVNLNR(K)<br>(R)LMEPIYLVEIQcPEQVVGGIYGVNLNR(K)<br>(R)YVEPIEDVPcGNIVGLVGVDDQFLVK(T)<br>(K)STAISLFYELSENDLNFIK(Q)<br>(K)DSVVAGFQWATK(E)<br>(K)EGIPALDNFLDKL(-)<br>(K)EGIPALDNFLDKL(-)<br>(R)GHVFESQVAGTPMFVVK(A)<br>(K)AYLPVNESFGFTADLR(S)<br>(R)ALLELQLEPEELYQTFQR(I)<br>(R)WLPAGDALLQMITIHLPSVTAQK(Y)<br>(K)AYLPVNESFGFTADLR(S)<br>(K)EGIPALDNFLDKL(-)<br>(R)ALLELQLEPEELYQTFQR(I)<br>(K)VFDAIMNFK(K)<br>(K)ARPPFDGLAEDIDKGEVSAR(Q)<br>(K)IWcFGPDGTGPNILTDITK(G) | 7 | (K)STAISLFYELSENDLNFIK(Q)<br>(R)LmEPIYLVEIQcPEQVVGGIYGVNLNR(K)<br>(R)VFSGLVSTGLK(V)<br>(R)ALLELQLEPEELYQTFQR(I)<br>(K)AYLPVNESFGFTADLR(S)<br>(K)IWcFGPDGTGPNILTDITK(G)<br>(K)VFDAIMNFK(K) | translation<br>regulator | 0 |

|    |          |        |         |   |                                                                                                                                                                                   |    |                                                                                                                                                                                                                                                                                                             |        |   |
|----|----------|--------|---------|---|-----------------------------------------------------------------------------------------------------------------------------------------------------------------------------------|----|-------------------------------------------------------------------------------------------------------------------------------------------------------------------------------------------------------------------------------------------------------------------------------------------------------------|--------|---|
|    |          |        |         |   | (K)EGIPALDNFLDK(L)<br>(R)KIWcFGPDGTGPNILTITK(G)                                                                                                                                   |    |                                                                                                                                                                                                                                                                                                             |        |   |
| 5  | 6.47E+06 | P13797 | PLS3    | 2 | (K)YPALTKPENQDIDWTLLEGETR(E)<br>(K)ANDDIIVNWVNR(T)                                                                                                                                | 0  |                                                                                                                                                                                                                                                                                                             | other  | 1 |
| 3  | 2.45E+06 | P14314 | PRKCSH  | 1 | (K)MPPYDEQTQAFIDAAQEAR(N)                                                                                                                                                         | 1  | (K)MPPYDEQTQAFIDAAQEAR(N)                                                                                                                                                                                                                                                                                   | enzyme | 0 |
| 18 | 3.31E+07 | P14618 | PKM2    | 6 | (R)LAPITSDPTEATAVGAVEASF(K)<br>(K)FGVEQDmVFASFIR(K)<br>(K)GVNLPAAVDLPVSEK(D)<br>(K)GADFLVTEVENGSLGSK(K)<br>(K)ITLDNAYmEK(C)<br>(K)DPVQEAWAEDVDLR(V)                               | 10 | (K)GVNLPAAVDLPVSEK(D)<br><br>(K)GADFLVTEVENGSLGSK(K)<br><br>(R)LAPITSDPTEATAVGAVEASF(K)<br><br>(R)EAEAAIYHLQLFEELR(R)<br><br>(K)IYVDDGLISLQVK(Q)<br><br>(K)ITLDNAYmEK(C)<br><br>(R)GIFPVLcKDPVQEAWAEDVDLR(V)<br><br>(K)FGVEQDmVFASFIR(K)<br><br>(K)KGVNLPAAVDLPVSEK(D)<br><br>(R)TATESFASDPILYRPVAVALDTK(G) | kinase | 1 |
| 14 | 5.83E+06 | P14625 | HSP90B1 | 9 | (R)EEEAQLDGLNASQIR(E)<br>(R)ELISNASDALDK(I)<br>(K)YSQFINFPIYVWSSK(T)<br>(K)EEASDYLELDTIK(N)<br>(K)EFEPLLNWmK(D)<br>(K)SILFVPTSAPR(G)<br>(K)DISTNYYASQK(K)<br>(K)TETVEEPMEEEAAK(E) | 9  | (K)DISTNYYASQK(K)<br><br>(K)EFEPLLNWmK(D)<br><br>(K)GVVDSDDLPLNVSR(E)<br><br>(K)GYEVIYLTEPVDEYcIQALPEFDGK(R)<br><br>(K)TETVEEPMEEEAAK(E)<br><br>(K)YSQFINFPIYVWSSK(T)                                                                                                                                       | other  | 0 |

|   |          |        |        |   |                                                                                                                                                                                   |   |                                                                       |                           |   |
|---|----------|--------|--------|---|-----------------------------------------------------------------------------------------------------------------------------------------------------------------------------------|---|-----------------------------------------------------------------------|---------------------------|---|
|   |          |        |        |   | (K)EESDDEAAVEEEEEK(K)                                                                                                                                                             |   | (R)EEEAQLDGLNASQIR(E)<br>(R)LISLTDENALSGNEELTVK(I)<br>(R)SGYLLPDTK(A) |                           |   |
| 9 | 1.89E+06 | P14866 | HNRNPL | 3 | (K)NDQDTWDYTNPNLSGGQDPSNPNGR(Q)<br>(K)SDALETGLFLNHQmK(N)<br>(R)SSSGLLEWESK(S)                                                                                                     | 2 | (K)SDALETGLFLNHQmK(N)<br>(K)SKPGAAmVEmADGYAVDR(A)                     | other                     | 0 |
| 6 | 1.15E+07 | P15311 | EZR    | 3 | (K)FYPEDVAEELIQDITQK(L)<br>(K)EGILNDDIYcPPETAVLLASYAVQSK(Y)<br>(K)IGFPWSEIR(N)                                                                                                    | 1 | (K)FYPEDVAEELIQDITQK(L)                                               | other                     | 3 |
| 5 | 1.54E+06 | P16070 | CD44   | 2 | (K)ESSETPDQFMTADETR(N)<br>(R)TNPEDIYPSNPTDDDVSSGSSSER(S)                                                                                                                          | 1 | (K)ESSETPDQFMTADETR(N)                                                | other                     | 5 |
| 4 | 5.57E+06 | P16144 | ITGB4  | 7 | (R)EGIIITESQDGGPFPQLGSR(A)<br>(R)DVVSFEQPEFSVSR(G)<br>(R)DYIPVEGELLFQPGAEWK(E)<br>(K)VAPGYTLTADQDAR(G)<br>(R)LTVPGLSENVPYK(F)<br>(K)QLLVEAIDVPAGTATLGR(R)<br>(R)DYSTLTSVSSHDSR(L) | 2 | (R)VLSQLTSDYTIGFGK(F)<br>(K)QLLVEAIDVPAGTATLGR(R)                     | transmembrane<br>receptor | 4 |
| 4 | 6.39E+06 | P17066 | HSPA6  | 2 | (R)IINEPTAAAIAYGLDR(R)<br>(K)SINPDEAVAYGAAVQAAVLMGD(K)                                                                                                                            | 3 | (R)IINEPTAAAIAYGLDR(R)<br>(K)SINPDEAVAYGAAVQAAVLMGD(K)                | other                     | 1 |

|    |          |        |        |   |                                                                                                                         |   |                                                                           |             |   |
|----|----------|--------|--------|---|-------------------------------------------------------------------------------------------------------------------------|---|---------------------------------------------------------------------------|-------------|---|
| 7  | 3.15E+06 | P17301 | ITGA2  | 4 | (R)VDISLENPGTSPALEYSETAK(V)<br>(K)NMVVNQAQScPEHIIYIQEPSDVVNSLDLR(V)<br>(R)QIPAAEQPFIVSNQNK(R)<br>(K)GNWLLVGSPWSGFENR(M) | 1 | (R)VDISLENPGTSPALEYSETAK(V)                                               | other       | 5 |
| 1  | 6.60E+06 | P17661 | DES    | 1 | (K)VELQELNDR(F)                                                                                                         | 1 | (K)VELQELNDR(F)                                                           | other       | 0 |
| 5  | 2.93E+06 | P17812 | CTPS   | 2 | (R)VPLLLEEQGVVDYFLR(R)<br>(K)YIDSADLEPITSQEEPVR(Y)                                                                      | 2 | (K)YIDSADLEPITSQEEPVR(Y)<br>(R)VPLLLEEQGVVDYFLR(R)                        | enzyme      | 0 |
| 11 | 1.11E+07 | P17987 | TCP1   | 4 | (R)SLLVIPNTLAVNAAQDSTDVLAK(L)<br>(R)SQNVMAAASIANIVK(S)<br>(R)YINENLIVNTDELGR(D)<br>(K)VLcELADLQDK(E)                    | 0 |                                                                           | other       | 1 |
| 6  | 6.92E+06 | P19338 | NCL    | 3 | (K)VEGTEPTTAFNLFVGNLNFNK(S)<br>(K)GFGFVDFNSEEDAK(A)<br>(K)FGYVDFESAEDLEK(A)<br>(K)IHGERNVFEGIFNNAIFC(T)                 | 3 | (K)VEGTEPTTAFNLFVGNLNFNK(S)<br>(K)FGYVDFESAEDLEK(A)<br>(K)GLSEDTTEETLK(E) | other       | 0 |
| 2  | 3.72E+06 | P20020 | ATP2B1 | 4 | (R)QVVAVTGDGTNDGPALK(K)<br>(K)YGDLLPADGILIQGNDLK(I)<br>(K)TVIEPMASEGLRTICLAFRD(F)                                       | 2 | (K)YGDLLPADGILIQGNDLK(I)<br>(R)QVVAVTGDGTNDGPALK(K)                       | transporter | 4 |
| 1  | 3.69E+06 | P20648 | ATP4A  | 2 | (K)VDNSSLTGESEPQTR(S)<br>(K)VCEIPFNST(N)                                                                                | 0 |                                                                           | transporter | 4 |

|    |          |        |       |   |                                                                                                                                                                                                   |   |                                                                                                                  |             |   |
|----|----------|--------|-------|---|---------------------------------------------------------------------------------------------------------------------------------------------------------------------------------------------------|---|------------------------------------------------------------------------------------------------------------------|-------------|---|
| 16 | 1.32E+07 | P20700 | LMNB1 | 6 | (R)DQMQQQLNDYEQLLDVK(L)<br>(R)IQELEDLLAK(E)<br>(K)SmYEEEINETR(R)<br>(K)NQNSWGTGEDVK(V)<br>(R)SLETENSALQLQVTER(E)<br>(K)TTIPEEEEEEEAAGVVVEEELFHQQGTPR(A)                                           | 4 | (K)SLEGDLEDLKDQIAQLEASLAAAK(K)<br><br>(R)DQmQQQLNDYEQLLDVK(L)<br><br>(K)SmYEEEINETR(R)<br><br>(R)AGGPTTPLSPTR(L) | other       | 2 |
| 7  | 2.33E+06 | P21589 | NT5E  | 2 | (K)GPLASQISGLYPYK(V)<br>(K)ETPFLSNPGTNLVFEDEITALQPEVDK(L)                                                                                                                                         | 0 |                                                                                                                  | phosphatase | 4 |
| 7  | 4.08E+06 | P22234 | PAICS | 2 | (K)EIVLADVIDNDSWR(L)<br>(K)DDANNDPQWSEEQLIAAK(F)                                                                                                                                                  | 0 |                                                                                                                  | enzyme      | 0 |
| 12 | 1.34E+07 | P22314 | UBA1  | 7 | (R)NEEDAAELVALAQAVNAR(A)<br>(K)LAYVAAGDLAPINAFIGGLAAQEVMA(K)<br>(R)AAVATFLQSVQVPEFTPK(S)<br>(R)YDGQVAVFGSDLQEK(L)<br>(R)LAGTQPLEVLEAVQR(S)<br>(K)AVTLHDQGTAWADLSSQFYLR(E)<br>(K)QPAENVNQYLTPDK(F) | 2 | (R)IYDDDFQNLGDGVANALDNVDAR(M)<br><br>(R)AAVATFLQSVQVPEFTPK(S)                                                    | enzyme      | 0 |
| 6  | 1.02E+07 | P23229 | ITGA6 | 6 | (R)NSYPDVAVGSLSDSVTIFR(S)<br>(K)LETTSNQDNLAPITAK(A)<br>(K)NIGDINQDGYPDIAVGAPYDDLKG(V)<br>(K)LIATFPDTLTYSAYR(E)<br>(K)EDQWMGVTVQSQGPGGK(V)<br>(K)FGScQQGVAATFTK(D)                                 | 2 | (K)NIGDINQDGYPDIAVGAPYDDLKG(V)<br><br>(K)LIATFPDTLTYSAYR(E)                                                      | other       | 5 |

|    |          |        |        |   |                                                                                                                                                        |   |                                                        |             |   |
|----|----------|--------|--------|---|--------------------------------------------------------------------------------------------------------------------------------------------------------|---|--------------------------------------------------------|-------------|---|
| 5  | 2.84E+06 | P23246 | SFPQ   | 2 | (R)LFVGNLPADITEDEFK(R)<br>(R)NLSPYVSNELLEAFSQFGPIER(A)                                                                                                 | 2 | (R)LFVGNLPADITEDEFK(R)<br>(R)NLSPYVSNELLEAFSQFGPIER(A) | other       | 0 |
| 2  | 3.72E+06 | P23634 | ATP2B4 | 2 | (K)YGDLLPADGILIQGNDLK(I)<br>(R)QVVAVTGDGTNDGPALK(K)                                                                                                    | 2 | (K)YGDLLPADGILIQGNDLK(I)<br>(R)QVVAVTGDGTNDGPALK(K)    | transporter | 4 |
| 3  | 2.65E+06 | P23921 | RRM1   | 2 | (K)DDSIEGIYDTLK(Q)<br>(K)EQGPYETEGSPVSK(G)                                                                                                             | 0 |                                                        | enzyme      | 0 |
| 7  | 1.86E+06 | P24752 | ACAT1  | 2 | (R)NEQDAYAINSYTR(S)<br>(R)TPIGSFLGSLSLPATK(L)                                                                                                          | 2 | (R)NEQDAYAINSYTR(S)<br>(R)TPIGSFLGSLSLPATK(L)          | enzyme      | 0 |
| 17 | 6.35E+06 | P25705 | ATP5A1 | 6 | (R)EVAFAQFGSDLDAATQQLSR(G)<br>(K)QQQYSPMAIEEQVAVIYAGVR(G)<br>(R)VVDALGNAIDGK(G)<br>(R)TGAIVDVPVGEELLGR(V)<br>(R)ILGADTSVDLEETGR(V)<br>(K)HALIYDDLSK(Q) | 0 |                                                        | transporter | 2 |
| 7  | 1.47E+07 | P26038 | MSN    | 3 | (K)FYPEDVAEELIQDITQK(L)<br>(K)EGILNDDIYcPPETAVLLASYAVQSK(Y)<br>(K)IGFPWSEIR(N)                                                                         | 0 |                                                        | other       | 3 |
| 1  | 9.79E+05 | P26232 | CTNNA2 | 1 | (R)TSVQTEDDQLIAGQSAR(A)                                                                                                                                | 1 | (R)TSVQTEDDQLIAGQSAR(A)                                | other       | 3 |
| 5  | 5.80E+06 | P26368 | U2AF2  | 2 | (K)LFIGGLPNYLNDDQVK(E)<br>(K)ELLTSFGPLK(A)                                                                                                             | 0 |                                                        | other       | 0 |
| 13 | 1.20E+07 | P26599 | PTBP1  | 3 | (R)IAIPGLAGAGNSVLLVSNLNP(V)                                                                                                                            | 3 | (R)IAIPGLAGAGNSVLLVSNLNP(V)                            | enzyme      | 0 |

|    |          |        |          |   |                                                                                                                                                                  |   |                                                                                                                           |           |   |
|----|----------|--------|----------|---|------------------------------------------------------------------------------------------------------------------------------------------------------------------|---|---------------------------------------------------------------------------------------------------------------------------|-----------|---|
|    |          |        |          |   | (K)NNQFQALLQYADPVSAQHAK(L)<br>(K)NFQNIFFPSATLHLSNIPPSVSEEDLK(V)                                                                                                  |   | (K)NNQFQALLQYADPVSAQHAK(L)<br>(R)GQPIYIQFSNHK(E)                                                                          |           |   |
| 4  | 3.01E+06 | P27708 | CAD      | 6 | (R)VLGTSPEAIDSAENR(F)<br>(R)LLDTIGISQPQWR(E)<br>(R)EELSALVAPAFHAHTSQVLVDK(S)<br>(R)mAEIGEHVAPSEAANSLEQAQAAAER(L)<br>(R)LGGAVLSFSEATSSVQK(G)<br>(K)LALGIPLPELR(N) | 0 |                                                                                                                           | enzyme    | 0 |
| 7  | 8.46E+06 | P27824 | CANX     | 4 | (R)KIPNPDDFFEDLEPFR(M)<br>(K)IPNPDDFFEDLEPFR(M)<br>(K)APVPTGEVYFADSFDR(G)<br>(R)IVDDWANDGWGLK(K)                                                                 | 2 | (K)IPDPEAVKPDDWDEDAPAK(I)<br>(K)APVPTGEVYFADSFDR(G)                                                                       | other     | 3 |
| 4  | 4.30E+06 | P29401 | TKT      | 2 | (K)LDNLVAILDINR(L)<br>(R)SVPTSTVFYPSDGVATEK(A)                                                                                                                   | 0 |                                                                                                                           | enzyme    | 0 |
| 10 | 5.34E+05 | P29508 | SERPINB3 | 2 | (K)FYQTSVESVDFANAPEESR(K)<br>(K)VLHFDQVTENTTGK(A)                                                                                                                | 0 |                                                                                                                           | other     | 1 |
| 6  | 1.38E+07 | P30101 | PDIA3    | 2 | (R)FLQDYFDGNLK(R)<br>(K)TFSHELSDFGLESTAGEIPVVAIR(T)                                                                                                              | 7 | (K)VVVAENFDEIVNNENK(D)<br>(R)FLQDYFDGNLK(R)<br>(R)KTFSHELSDFGLESTAGEIPVVAIR(T)<br>(R)ELSDFISYLQR(E)<br>(R)GFPTIYFSPANK(K) | peptidase | 0 |

|    |          |        |         |   |                                                                                                                                |   |                                                                                                                                                                           |        |   |
|----|----------|--------|---------|---|--------------------------------------------------------------------------------------------------------------------------------|---|---------------------------------------------------------------------------------------------------------------------------------------------------------------------------|--------|---|
|    |          |        |         |   |                                                                                                                                |   | (K)DLLIAYDVDYK(N)<br>(R)GFPTIYFSPANK(K)                                                                                                                                   |        |   |
| 7  | 2.45E+06 | P31040 | SDHA    | 2 | (K)VSDSISAQYPVVDHEFDAVVVGAGGAGLR(A)<br>(K)EPIPVLPTVHYNMGGIPTNYK(G)                                                             | 0 |                                                                                                                                                                           | enzyme | 1 |
| 11 | 9.33E+06 | P31943 | HNRNPH1 | 3 | (R)ATENDIYNFFSPLNPVR(V)<br>(K)ITGEAFVQFASQELA EK(A)<br>(R)STGEAFVQFASQEIAEK(A)                                                 | 6 | (R)ATENDIYNFFSPLNPVR(V)<br>(K)ITGEAFVQFASQELA EK(A)<br>(K)EEIVQFFSGLEIVPNGITLPVDFQGR(S)<br>(R)DLNYcFSGmSDHR(Y)<br>(R)EGRPSGEAFVELESEDEVK(L)<br>(R)YVELFLNSTAGASGGAYEHR(Y) | other  | 0 |
| 4  | 8.48E+06 | P33991 | MCM4    | 2 | (R)TSVLAAANPIESQWNP(K)<br>(R)LGEINVIGEPFLNVNcEHIK(S)                                                                           | 0 |                                                                                                                                                                           | enzyme | 0 |
| 3  | 2.47E+06 | P33992 | MCM5    | 2 | (R)LAALPNVYEVIK(S)<br>(R)SFAGAVSPQEEEEFR(L)                                                                                    | 0 |                                                                                                                                                                           | enzyme | 0 |
| 14 | 2.56E+07 | P34931 | HSPA1L  | 5 | (K)AFYPEEISSmVLTK(L)<br>(K)ATAGDTHLGGEDFDNR(L)<br>(K)SINPDEAVAYGA AVQAAILmGDK(S)<br>(R)FEELCADLFR(G)<br>(R)IINEPTAAAIAYGLDK(R) | 6 | (K)AFYPEEISSmVLTK(L)<br>(K)ATAGDTHLGGEDFDNR(L)<br>(K)DAGVIAGLNVLR(I)<br>(K)SINPDEAVAYGA AVQAAILmGDK(S)<br>(R)FEELCADLFR(G)<br>(R)IINEPTAAAIAYGLDK(R)                      | other  | 0 |
| 10 | 4.46E+06 | P35221 | CTNNA1  | 8 | (K)AEVQNLGGELVVGVDAmSLIQAAK(N)<br>(R)TSVQTEDDQLIAGQSAR(A)                                                                      | 2 | (K)AEVQNLGGELVVGVDAmSLIQAAK(N)<br>(K)SQGMASLNLPAVSWK(M)                                                                                                                   | other  | 3 |

|    |          |        |       |    |                                                                                                                                                                                                                                                                                                |   |                           |             |   |
|----|----------|--------|-------|----|------------------------------------------------------------------------------------------------------------------------------------------------------------------------------------------------------------------------------------------------------------------------------------------------|---|---------------------------|-------------|---|
|    |          |        |       |    | (R)NAGNEQDLGIQYK(A)<br>(K)IAEQVASFQEEK(S)<br>(R)mSASQLEALcPQVINAALALAAKPQSK(L)<br>(R)QALQDLLSEYmGNAGR(K)<br>(K)SQGmASLNLPAVSWK(M)<br>(K)NVPILYTASQAcLQHPDVAAYK(A)                                                                                                                              |   |                           |             |   |
| 3  | 1.86E+07 | P35241 | RDX   | 2  | (K)EGILNDDIYcPPETA VLLASYAVQSK(Y)<br>(K)IGFPWSEIR(N)                                                                                                                                                                                                                                           | 0 |                           | other       | 2 |
| 30 | 2.62E+06 | P35527 | KRT9  | 10 | (K)EIETYHNLEGGQEDFESSGAGK(I)<br>(K)NYSPYYNTIDDLK(D)<br>(K)SDLEmQYETLQEELmALK(K)<br>(K)VQALEEANNLENK(I)<br>(R)GGSGSGSHGGSGFGGESGGSYGGGEEASGSGGGYGG<br>GSGK(S)<br>(R)GGSGGSYGGGSGGGYGGGSGSR(G)<br>(R)HGVQELEIELQSQLSK(K)<br>(R)QEYEQLIAK(N)<br>(R)QVLDNLTmEK(S)<br>(R)YcGQLQmIQEQISNLEAQITDVR(Q) | 0 |                           | other       | 0 |
| 3  | 5.11E+06 | P35606 | COPB2 | 2  | (K)AAESLADPTEYENLFPGLK(E)<br>(R)GSNNVALGYDEGSIIVK(L)                                                                                                                                                                                                                                           | 1 | (K)AAESLADPTEYENLFPGLK(E) | transporter | 1 |
| 4  | 5.41E+07 | P35613 | BSG   | 1  | (R)SELHIENLNMEADPGQYR(C)                                                                                                                                                                                                                                                                       | 0 |                           | transporter | 5 |
| 5  | 5.39E+06 | P36957 | DLST  | 2  | (K)ASAFALQEQPVVNAVIDDTTK(E)                                                                                                                                                                                                                                                                    | 0 |                           | enzyme      | 1 |

|    |          |        |        |    |                                                                                                                                                                                                                   |   |                                                                                                                                                                               |        |   |
|----|----------|--------|--------|----|-------------------------------------------------------------------------------------------------------------------------------------------------------------------------------------------------------------------|---|-------------------------------------------------------------------------------------------------------------------------------------------------------------------------------|--------|---|
|    |          |        |        |    | (R)VLLLDL(-)                                                                                                                                                                                                      |   |                                                                                                                                                                               |        |   |
| 14 | 3.71E+07 | P38646 | HSPA9  | 7  | (R)VINEPTAAALAYGLDK(S)<br>(R)AQFEGIVTDLIR(R)<br>(K)VQQTVDLFGFR(A)<br>(R)QAVTNPNNTFYATK(R)<br>(K)STNGDTFLGGEDFDQALLR(H)<br>(R)EQQIVIQSSGGLSK(D)<br>(K)NAVITVPAYFNDSQR(Q)                                           | 7 | (R)VINEPTAAALAYGLDK(S)<br>(R)AQFEGIVTDLIR(R)<br>(K)LYSPSQIGAFVLMK(M)<br>(R)QAVTNPNNTFYATK(R)<br>(R)EQQIVIQSSGGLSK(D)<br>(K)STNGDTFLGGEDFDQALLR(H)<br>(R)VEAVNmAEGIIHDTETK(M)  | other  | 0 |
| 3  | 9.61E+05 | P38919 | EIF4A3 | 1  | (R)GIYAYGFEPKSAIQQR(A)                                                                                                                                                                                            | 0 |                                                                                                                                                                               | enzyme | 0 |
| 15 | 1.14E+07 | P40227 | CCT6A  | 5  | (K)VHAELADVLTEAVVDSILAIK(K)<br>(K)VATAQDDITGDGTTSNVLIIGELLK(Q)<br>(K)ALQFLEEVK(V)<br>(K)MLVSGAGDIK(L)<br>(K)VLAQNSGFDLQETLVK(I)                                                                                   | 2 | (K)MLVSGAGDIK(L)<br>(K)VHAELADVLTEAVVDSILAIK(K)                                                                                                                               | other  | 0 |
| 31 | 9.13E+06 | P40939 | HADHA  | 14 | (K)TLQEVTLQSQAQR(I)<br>(R)DSIFSNLTGQLDYQGFEK(A)<br>(K)ADMVIEAVFEDLSLK(H)<br>(K)MGLVDQLVEPLGPGPKPPEER(T)<br>(K)DLNSDMDSILASLK(L)<br>(K)MVGVPAAALDMMMLTGR(S)<br>(R)FGGGNPELLTQMVSK(G)<br>(K)ELHSEFSEVMNEIWASDQIR(S) | 9 | (K)TLQEVTLQSQAQR(I)<br>(K)DLNSDMDSILASLK(L)<br>(R)DSIFSNLTGQLDYQGFEK(A)<br>(R)FGGGNPELLTQMVSK(G)<br>(K)MGLVDQLVEPLGPGPKPPEER(T)<br>(K)DTSASAVAVGLK(Q)<br>(R)TIEYLEEVAITFAK(G) | enzyme | 0 |

|   |          |        |        |   |                                                                                                                                                                                                     |   |                                                                                                                                                                                               |        |   |
|---|----------|--------|--------|---|-----------------------------------------------------------------------------------------------------------------------------------------------------------------------------------------------------|---|-----------------------------------------------------------------------------------------------------------------------------------------------------------------------------------------------|--------|---|
|   |          |        |        |   | (K)EVEAVIPDHcIFASNTSALPISEIAAVSK(R)<br>(K)TVLGTPEVLLGALPGAGGTQR(L)<br>(K)KLDSLTSFGFPVGAATLVDEVGVDVAK(H)<br>(K)MQLLEIITTEK(T)<br>(K)DATLTALDR(G)<br>(R)TIEYLEEVAITFAK(G)                             |   | (K)DATLTALDR(G)<br>(K)EVEAVIPDHcIFASNTSALPISEIAAVSK(R)                                                                                                                                        |        |   |
| 6 | 6.93E+05 | P41250 | GARS   | 2 | (K)TLYVEEVVPNVIEPSFGLGR(I)<br>(K)KSEMESVLAQLDNYGQQLADLFVNYNVK(S)                                                                                                                                    | 0 |                                                                                                                                                                                               | enzyme | 0 |
| 9 | 8.26E+06 | P41252 | IARS   | 8 | (K)LFLNETQTQEITEDIPVK(T)<br>(K)YRPLFDYFLK(C)<br>(R)EFEDAFPADFIAEGIDQTR(G)<br>(R)VENMVDQLLR(N)<br>(K)TESAVSQMQSVIELGR(V)<br>(R)LMAPYTPFLTELMYQNLK(V)<br>(K)TLYPQFMESVWWVFK(Q)<br>(K)TVYVSVLPTTADF(-) | 3 | (K)DSLPCVPVDASGcFTTEVTDFAGQYVK(D)<br>(R)VENMVDQLLR(N)<br>(R)EFEDAFPADFIAEGIDQTR(G)                                                                                                            | enzyme | 0 |
| 6 | 2.12E+06 | P42704 | LRPPRC | 5 | (R)LANQFAIYKPVTDFFLQLVDAGK(V)<br>(R)DAGIEPGPDYTLALLNAYA EK(G)<br>(R)YIPDAMNLILLVTEK(L)<br>(K)AGYPQYVSEILEK(V)<br>(R)SMNINLWSEITELLYK(D)                                                             | 9 | (R)DAGIEPGPDYTLALLNAYA EK(G)<br>(K)TVQLTSSELESTLET(LK(A)<br>(R)SmNINLWSEITELLYK(D)<br>(R)GPTEAVGYFLYNLIDMSDSEVQAK(E)<br>(K)ISNQFDWALMR(L)<br>(K)NNNIDAAIENIENMLTSENK(V)<br>(K)GFTLNDAAANSR(L) | other  | 1 |

|    |          |        |          |    |                                                                                                                                                                                                                                                                              |                                                                                                                                                      |           |   |
|----|----------|--------|----------|----|------------------------------------------------------------------------------------------------------------------------------------------------------------------------------------------------------------------------------------------------------------------------------|------------------------------------------------------------------------------------------------------------------------------------------------------|-----------|---|
|    |          |        |          |    |                                                                                                                                                                                                                                                                              | (R)EGNQEVFPDVPPELWYEDEK(H)<br>(K)VIEEQLEPAVEK(I)                                                                                                     |           |   |
| 11 | 7.57E+06 | P43243 | MATR3    | 5  | (R)IGPYQPNVPVGIDYVIPK(T)<br>(R)YQLQLVEPFGVISNHLILNK(I)<br>(R)GDADQASNILASFGLSAR(D)<br>(R)DLSAAGIGLAAATQSLMPASLGR(M)<br>(K)ITPENLPQILLQLK(R)                                                                                                                                  | 5<br>(R)IGPYQPNVPVGIDYVIPK(T)<br>(R)GDADQASNILASFGLSAR(D)<br>(K)ITPENLPQILLQLK(R)<br>(R)DLSAAGIGLAAATQSLMPASLGR(M)<br>(K)IEELDQENEALENGIK(N)         | other     | 0 |
| 4  | 3.19E+06 | P43246 | MSH2     | 2  | (R)ALNLFQGSVEDTTGSQSLAALLNK(C)<br>(R)LYQGINQLPNVIALEK(H)                                                                                                                                                                                                                     | 0                                                                                                                                                    | enzyme    | 0 |
| 5  | 2.72E+06 | P45974 | USP5     | 2  | (R)IGEWELIQESGVPLKPLFGPGYTGIR(N)<br>(R)GTGLQPGEEELPDIAPPLVTPDEPK(G)                                                                                                                                                                                                          | 0                                                                                                                                                    | peptidase | 0 |
| 10 | 4.09E+06 | P46940 | IQGAP1   | 10 | (K)LEGVLAQHYQDTLIR(A)<br>(R)SPDVGLYGVIEcGETYHSDLAELAK(K)<br>(K)LPYDVTPEQALAEVVK(T)<br>(K)IGGILANELSVDEAALHAAVIAINEAIDR(R)<br>(R)EEIQSSISGVTAAYNR(E)<br>(K)LGLAPQIQDLYGK(V)<br>(K)TLINAEPPMVVVR(K)<br>(K)EELQSGVDAANSAAQYQR(R)<br>(R)SNQQLENDLNLMDIK(I)<br>(K)IFYPETTDIYDR(K) | 5<br>(R)SPDVGLYGVIEcGETYHSDLAELAK(K)<br>(K)IGGILANELSVDEAALHAAVIAINEAIDR(R)<br>(R)SNQQLENDLNLMDIK(I)<br>(K)IFYPETTDIYDR(K)<br>(R)EEIQSSISGVTAAYNR(E) | other     | 2 |
| 10 | 5.34E+05 | P48594 | SERPINB4 | 2  | (K)DLSMIVLLPNEIDGLQK(L)                                                                                                                                                                                                                                                      | 0                                                                                                                                                    | other     | 0 |

|    |          |        |       |    |                                                                                                                                                                                                                                                                                                                                                                                                                                                                                                                                             |    |                                                                                                                                                                                                                                                                                                                                                                                                                                                     |        |   |
|----|----------|--------|-------|----|---------------------------------------------------------------------------------------------------------------------------------------------------------------------------------------------------------------------------------------------------------------------------------------------------------------------------------------------------------------------------------------------------------------------------------------------------------------------------------------------------------------------------------------------|----|-----------------------------------------------------------------------------------------------------------------------------------------------------------------------------------------------------------------------------------------------------------------------------------------------------------------------------------------------------------------------------------------------------------------------------------------------------|--------|---|
|    |          |        |       |    | (K)ENNIFYSPISITSALGmVLLGAK(D)                                                                                                                                                                                                                                                                                                                                                                                                                                                                                                               |    |                                                                                                                                                                                                                                                                                                                                                                                                                                                     |        |   |
| 4  | 4.30E+06 | P48741 | HSPA7 | 1  | (K)ATAGDTHLGGEDFDNR(L)                                                                                                                                                                                                                                                                                                                                                                                                                                                                                                                      | 2  | (K)ATAGDTHLGGEDFDNR(L)<br>(K)RNVLIFDLGGGTG(D)                                                                                                                                                                                                                                                                                                                                                                                                       | other  | 1 |
| 6  | 2.86E+06 | P49321 | NASP  | 2  | (K)GGAAPEGPNEAEVTSGKPEQEVPAEEEEK(S)<br>(K)DGAVNGPSVVGDTPIEPQTSIER(L)                                                                                                                                                                                                                                                                                                                                                                                                                                                                        | 0  |                                                                                                                                                                                                                                                                                                                                                                                                                                                     | other  | 0 |
| 14 | 4.32E+06 | P49327 | FASN  | 23 | (K)AcLDTAVENMPSLK(M)<br>(K)AQVADVVSRR(W)<br>(K)DTVTISGPQAPVFEFVEQLR(K)<br>(K)EDGLAQQTQLNLR(S)<br>(K)EQGVTFPSGDIQEQLIR(S)<br>(K)GVDLVNLSLAEEK(L)<br>(K)GVDLVNLSLAEEK(L)<br>(K)LPEDPLLSGLLDSPALK(A)<br>(K)LPESENQEFWDNLIGGVDMVTDDRRR(W)<br>(K)MVVPGLDGAQIPR(D)<br>(K)VGDQPQLNGITR(A)<br>(K)VYQWDDPDPR(L)<br>(K)WTSQDSSLGMEFSGR(D)<br>(R)cVLLSNLSSTSHVPEVDPGSAELQK(V)<br>(R)HSQDLAFLSMLNDIAAVPATAMPFR(G)<br>(R)LFDHPESPTPNPTEPLFLAQAEVYK(E)<br>(R)LHLSGIDANPNALFPPVEFPAPR(G)<br>(R)RQQEQQVPILEK(F)<br>(R)SEGVVAVLLTK(K)<br>(R)SLLVNPEGPTLMR(L) | 18 | (K)AQVADVVSRR(W)<br>(K)EDGLAQQTQLNLR(S)<br>(K)EQGVTFPSGDIQEQLIR(S)<br>(K)GILADESSRPVWLK(A)<br>(K)GVDLVNLSLAEEK(L)<br>(K)LPEDPLLSGLLDSPALK(A)<br>(K)LPESENQEFWDNLIGGVDMVTDDRRR(W)<br>(K)VGDQPQLNGITR(A)<br>(K)WTSQDSSLGMEFSGR(D)<br>(R)cVLLSNLSSTSHVPEVDPGSAELQK(V)<br>(R)DLVEAVAHILGIR(D)<br>(R)GNAGQSNYGFANSAMER(I)<br>(R)HSQDLAFLSMLNDIAAVPATAMPFR(G)<br>(R)LFDHPESPTPNPTEPLFLAQAEVYK(E)<br>(R)QGVQVQVSTSNISLEGAR(G)<br>(R)RPTPQDSPIFLPVDDTSFR(W) | enzyme | 1 |

|    |          |        |        |   |                                                                                                                                  |   |                                                                                            |                          |   |
|----|----------|--------|--------|---|----------------------------------------------------------------------------------------------------------------------------------|---|--------------------------------------------------------------------------------------------|--------------------------|---|
|    |          |        |        |   | (R)SLYQSAGVAPESFEYIEAHGTGTK(V)<br>(R)VLEALLPLK(G)<br>(R)VYATILNAGTNTDGFK(E)                                                      |   | (R)SLYQSAGVAPESFEYIEAHGTGTK(V)<br>(R)TLLEGSGLESIIHSLSLAEP(R)                               |                          |   |
| 7  | 5.46E+06 | P49411 | TUFM   | 2 | (K)LLDAVDTYIPVPAR(D)<br>(R)TIGTGLVTNTLAMTEEEK(N)                                                                                 | 2 | (R)TIGTGLVTNTLAMTEEEK(N)<br>(R)DLEKPFLLPVEAVSVPR(G)                                        | translation<br>regulator | 0 |
| 12 | 3.82E+06 | P49748 | ACADVL | 5 | (R)EGmAALQSDPWQQELYR(N)<br>(K)ELGAFGLQVPSELGGVGLcNTQYAR(L)<br>(K)NPFNGAGLLGEAGK(Q)<br>(R)IFEGTNDILR(L)<br>(K)NDALEmVEETTWQGLK(E) | 3 | (R)VPSENVLGEVSGFK(V)<br>(K)ELGAFGLQVPSELGGVGLcNTQYAR(L)<br>(K)GQLTTDQVFPYPSVLNEEQTQFLK(E)  | enzyme                   | 1 |
| 9  | 4.88E+06 | P49915 | GMPS   | 4 | (R)ELFVQSEIFPLETPAFAIK(E)<br>(R)IMYDLTSKPPGTTEWE(-)<br>(R)ELGLPEELVSR(H)<br>(K)EPPTDVTPTFLTGGVLSLR(Q)                            | 3 | (R)TFITSDFMTGIPATPGNEIPVEVVLK(M)<br>(K)EPPTDVTPTFLTGGVLSLR(Q)<br>(R)ELFVQSEIFPLETPAFAIK(E) | enzyme                   | 0 |
| 4  | 1.65E+07 | P50990 | CCT8   | 2 | (K)AIADTGANVVVTGGK(V)<br>(K)LFVTNDAATILR(E)                                                                                      | 0 |                                                                                            | enzyme                   | 0 |
| 5  | 2.91E+06 | P50991 | CCT4   | 2 | (R)DALSDLALHFLNK(M)<br>(K)TMDNQIVVSDYAQM(R)                                                                                      | 3 | (K)VIDPATATSVDLR(D)<br>(R)ALIAGGGAPEIELALR(L)<br>(R)ETLLNSATSLNSK(V)                       | other                    | 0 |
| 5  | 3.95E+07 | P50993 | ATP1A2 | 3 | (K)QAADMILLDDNFASIVTGVVEGR(L)<br>(K)GVGIIEGNETVEDIAR(L)                                                                          | 1 | (R)QGAIVAVTGDGVNDSPALK(K)                                                                  | transporter              | 4 |

|    |          |        |        |    |                                                                                                                                                                                                                                                                                                               |   |                                                                              |             |   |
|----|----------|--------|--------|----|---------------------------------------------------------------------------------------------------------------------------------------------------------------------------------------------------------------------------------------------------------------------------------------------------------------|---|------------------------------------------------------------------------------|-------------|---|
|    |          |        |        |    | (K)VDNSSLTGESEPQTR(S)                                                                                                                                                                                                                                                                                         |   |                                                                              |             |   |
| 10 | 5.25E+06 | P52272 | HNRNPM | 5  | (R)AFITNIPFDVK(W)<br>(R)GNFGGSFAGSFGGAGGHAPGVAR(K)<br>(K)VGEVTYVELLMDAEGK(S)<br>(R)LGSTVFVANLDYK(V)<br>(K)DKFNEcGHVLYADIK(M)                                                                                                                                                                                  | 2 | (R)AFITNIPFDVK(W)<br>(K)VGEVTYVELLMDAEGK(S)                                  | other       | 0 |
| 10 | 6.19E+06 | P52292 | KPNA2  | 3  | (K)GINSSNVENQLQATQAAR(K)<br>(K)LLGASELPIVTPALR(A)<br>(R)NKNPAPPIDAVEQILPTLVR(L)                                                                                                                                                                                                                               | 3 | (K)LLGASELPIVTPALR(A)<br>(R)NKNPAPPIDAVEQILPTLVR(L)<br>(R)NVSSFDDATSPLENR(N) | transporter | 0 |
| 8  | 7.34E+06 | P52597 | HNRNPF | 2  | (K)ITGEAFVQFASQELAEK(A)<br>(K)HSGPNSADSANDGFVR(L)                                                                                                                                                                                                                                                             | 2 | (K)ITGEAFVQFASQELAEK(A)<br>(K)HSGPNSADSANDGFVR(L)                            | other       | 0 |
| 16 | 2.40E+07 | P53396 | ACLY   | 12 | (K)AFDSGIIPMEFVNK(M)<br>(K)GVTIIGPATVGGIKPGcFK(I)<br>(K)IGNTGGMLDNILASK(L)<br>(K)WGDIEFPPPFGR(E)<br>(R)DEPSVAAMVYPFTGDHK(Q)<br>(R)EAYPEEAYIADLDAK(S)<br>(R)GQELIYAGMPITEVFK(E)<br>(R)QHFPATPLLDYALEVEK(I)<br>(R)SAYDSTMETMNYAQIR(T)<br>(R)SGGMSNELNNIISR(T)<br>(R)TIAIIAEGIPEALTR(K)<br>(R)TTDGVYEGVAIGGDR(Y) | 0 |                                                                              | enzyme      | 0 |
| 1  | 7.20E+06 | P53675 | CLTCL1 | 2  | (K)AFMTADLPNELIELLEK(I)                                                                                                                                                                                                                                                                                       | 2 |                                                                              | other       | 2 |

|    |          |        |              |   |                                                                                                                                   |   |                                                                                                                          |             |   |
|----|----------|--------|--------------|---|-----------------------------------------------------------------------------------------------------------------------------------|---|--------------------------------------------------------------------------------------------------------------------------|-------------|---|
|    |          |        |              |   | (R)GQFSTDELVAEVEKR(N)                                                                                                             |   |                                                                                                                          |             |   |
| 6  | 3.34E+07 | P54652 | HSPA2        | 3 | (R)IINEPTAAAIAYGLDK(K)<br>(K)TFFPEEISSmVLTK(M)<br>(K)SINPDEAVAYGAAVQAAILIGDK(S)                                                   | 5 | (K)SINPDEAVAYGAAVQAAILIGDK(S)<br>(K)GQIQEIVLVGGSTR(I)<br>(R)FEELNADLFR(G)<br>(K)DAGTITGLNVLR(I)<br>(K)NQVAMNPTNTIFDAK(R) | other       | 1 |
| 7  | 3.43E+06 | P54886 | ALDH18A<br>1 | 4 | (R)LASIVEQVSVLQNQGR(E)<br>(K)VGTFEVEVKPAGPTVEQQGEMAR(S)<br>(K)LIDIFYPGDQQSVTFGTK(S)<br>(K)CEYPAACNALETLL(I)                       | 2 | (K)LIDIFYPGDQQSVTFGTK(S)<br>(R)LASIVEQVSVLQNQGR(E)                                                                       | kinase      | 1 |
| 7  | 1.99E+06 | P55060 | CSE1L        | 4 | (K)FLESVEGNQNYPLLLTLLEK(S)<br>(K)YGALALQEIFDGIQPK(M)<br>(R)SFSLLQEAIIPIPTLITQLTQK(L)<br>(K)LVLDAFALPLTNLFK(A)                     | 0 |                                                                                                                          | transporter | 0 |
| 10 | 4.42E+06 | P55072 | VCP          | 5 | (R)IVSQLLTLMMDGLK(Q)<br>(K)NAPAIIFIDELDAIAPK(R)<br>(R)LDQLIYIPLDEK(S)<br>(R)LIVDEAINEDNSVVSLSQPK(M)<br>(R)ETVVEVPQVTWEDIGLEDVK(R) | 3 | (K)NAPAIIFIDELDAIAPK(R)<br>(R)IVSQLLTLMMDGLK(Q)<br>(R)LDQLIYIPLDEK(S)                                                    | enzyme      | 0 |
| 2  | 2.56E+06 | P55265 | ADAR         | 2 | (R)WNVLGLQGALLTHFLQPIYLK(S)<br>(R)YLNTNPVGGLLLEYAR(S)                                                                             | 2 | (R)YLNTNPVGGLLLEYAR(S)<br>(R)NTNSVPETAPAAIPETR(R)                                                                        | enzyme      | 0 |

|    |          |        |         |   |                                                                                                                                                                                          |   |                                                                                                                                                                                       |                            |   |
|----|----------|--------|---------|---|------------------------------------------------------------------------------------------------------------------------------------------------------------------------------------------|---|---------------------------------------------------------------------------------------------------------------------------------------------------------------------------------------|----------------------------|---|
| 7  | 1.02E+07 | P55795 | HNRNPH2 | 2 | (K)ITGEAFVQFASQELAЕК(A)<br>(R)STGEAFVQFASQEIAЕК(A)                                                                                                                                       | 3 | (R)ATENDIYNFFSPLNPVR(V)<br>(K)ITGEAFVQFASQELAЕК(A)<br>(R)STGEAFVQFASQEIAЕК(A)                                                                                                         | other                      | 0 |
| 4  | 1.23E+06 | P56192 | MARS    | 2 | (K)ITQDIFQQLK(R)<br>(R)AVTNEPEEEELATLSEEEIAMAVTAWЕК(G)                                                                                                                                   | 0 |                                                                                                                                                                                       | enzyme                     | 0 |
| 9  | 6.80E+05 | P60842 | EIF4A1  | 2 | (R)GIYAYGFЕKPSAIQQR(A)<br>(R)DIETFYNTSIEEMPLNVADLI(-)                                                                                                                                    | 0 |                                                                                                                                                                                       | translation<br>regulator   | 0 |
| 8  | 1.48E+06 | P61163 | ACTR1A  | 2 | (R)TLFSNIVLSGGSTLFK(G)<br>(K)AQYYLPDGSTIEIGPSR(F)                                                                                                                                        | 0 |                                                                                                                                                                                       | other                      | 1 |
| 26 | 9.29E+06 | P61978 | HNRNPK  | 6 | (K)IILDISESPIK(G)<br>(R)IITITGTQDQIQNAQYLLQNSVK(Q)<br>(R)TDYNASVSPDSSGPER(I)<br>(R)ILSISADIETIGEILK(K)<br>(R)GSYGD LGGP IIT TQVTIPK(D)<br>(K)IIP TLE E GLQLPSPTATSQLPLESDAVEcLNYQH YK(G) | 6 | (R)GSYGD LGGP IIT TQVTIPK(D)<br>(R)IITITGTQDQIQNAQYLLQNSVK(Q)<br>(K)IILDISESPIK(G)<br>(K)IIP TLE E GLQLPSPTATSQLPLESDAVEcLNYQH YK(G)<br>(R)TDYNASVSPDSSGPER(I)<br>(K)RPAEDmEEEQAFK(R) | other                      | 0 |
| 7  | 3.03E+06 | P62333 | PSMC6   | 2 | (R)EVIELPLTNPELFQR(V)<br>(K)ALQSVGQIVGEVLK(Q)                                                                                                                                            | 0 |                                                                                                                                                                                       | peptidase                  | 0 |
| 32 | 7.95E+06 | P62988 |         | 2 | (K)TITLEVEPSDTIENVK(A)<br>(R)TLDYNIQK(E)                                                                                                                                                 | 0 |                                                                                                                                                                                       |                            | 0 |
| 12 | 1.21E+06 | P67809 | YBX1    | 2 | (R)EDGNEEDKENQGDETQGGQPPQR(R)                                                                                                                                                            | 0 |                                                                                                                                                                                       | transcription<br>regulator | 0 |

|    |          |        |        |    |                                                                                                                                                                                                                                                         |   |                                                                                                                                                                       |                            |   |
|----|----------|--------|--------|----|---------------------------------------------------------------------------------------------------------------------------------------------------------------------------------------------------------------------------------------------------------|---|-----------------------------------------------------------------------------------------------------------------------------------------------------------------------|----------------------------|---|
|    |          |        |        |    | (K)GAEAAVNTGPGGVPVQGSK(Y)                                                                                                                                                                                                                               |   |                                                                                                                                                                       |                            |   |
| 25 | 7.15E+06 | P68104 | EEF1A1 | 5  | (K)DGNASGTTLLEALDcILPPTRPDKPLR(L)<br>(K)SGDAAIVDMVPGKPMcVESFSYDYPPLGR(F)<br>(K)NMITGTSQADcAVLIVAAGVGEFEAGISK(N)<br>(K)IGGIGTVPVGR(V)<br>(R)VETGVLKPGMVVTFAPVNVTEVK(S)                                                                                   | 5 | (K)NMITGTSQADcAVLIVAAGVGEFEAGISK(N)<br>(K)DGNASGTTLLEALDcILPPTRPDKPLR(L)<br>(R)VETGVLKPGMVVTFAPVNVTEVK(S)<br>(K)SGDAAIVDMVPGKPMcVESFSYDYPPLGR(F)<br>(K)IGGIGTVPVGR(V) | translation<br>regulator   | 1 |
| 3  | 1.30E+07 | P78347 | GTF2I  | 2  | (R)DQSAVVVQGLPEGVAFK(H)<br>(K)ANELPQPPVPEPANAGK(R)                                                                                                                                                                                                      | 0 |                                                                                                                                                                       | transcription<br>regulator | 0 |
| 13 | 5.72E+06 | P78371 | CCT2   | 4  | (K)LGGSLADSYLDEGLLDK(K)<br>(R)VQDDEVGDGTTSTVLAAELLR(E)<br>(R)LTSGAIAIGDLVK(S)<br>(R)DASLMVTNDGATILK(N)                                                                                                                                                  | 0 |                                                                                                                                                                       | kinase                     | 0 |
| 12 | 2.80E+06 | P78527 | PRKDC  | 33 | (K)AALSALFLK(Q)<br>(K)ATQMPEGGQGAPPMYQLYK(R)<br>(K)DLLLNTMSQEEK(A)<br>(K)GQAVTLLPFFSLTGGSLLELR(R)<br>(K)IPALDLLIK(L)<br>(K)ITAQSIEELcAVNLYGPDAQVDR(S)<br>(K)LNESTFDTQITK(K)<br>(K)LQSVQALTEIQEFISFISK(Q)<br>(K)LQYFMEQFYGIIR(N)<br>(K)LSDFNDITNMLLLK(M) | 6 | (K)LQSVQALTEIQEFISFISK(Q)<br>(R)MEVQEQEEDISSLIR(S)<br>(K)LAGANPAVITcDELLLGHEK(A)<br>(R)ATQQQHDFTLTQTADGR(S)<br>(K)LNESTFDTQITK(K)<br>(R)VTELALTASDR(Q)                | kinase                     | 0 |

|  |  |  |  |                                                                                                                                                                                                                                                                                                                                                                                                                                                                                                                                                                                                                                                                                                                        |  |  |  |  |
|--|--|--|--|------------------------------------------------------------------------------------------------------------------------------------------------------------------------------------------------------------------------------------------------------------------------------------------------------------------------------------------------------------------------------------------------------------------------------------------------------------------------------------------------------------------------------------------------------------------------------------------------------------------------------------------------------------------------------------------------------------------------|--|--|--|--|
|  |  |  |  | (K)LTPLPEDNSMNVDDQGDPSDR(M)<br>(K)NLDLAVLELMQSSVDNTK(M)<br>(K)NLSSNEAISLEEIR(I)<br>(K)SLEYcSTASIDSENPPDLNK(I)<br>(K)TVSLLDENNVSSYLSK(N)<br>(K)VYELLGLLGEVHPSEMINNAENLFR(A)<br>(R)AQEPESGLSEETQVK(C)<br>(R)DPESETDNDSQEIFK(L)<br>(R)DPTVHDDVLELmDELNR(H)<br>(R)ELLNPPVEFVSHPTTCR(E)<br>(R)GScVTQVGLLESVYEMFR(K)<br>(R)IIANALSSEPAcLAEIEEDK(A)<br>(R)IIANALSSEPAcLAEIEEDKAR(R)<br>(R)IMEFTTTLNNTSPEGWK(L)<br>(R)KEENASVIDSAELQAYPALVVEK(M)<br>(R)LGLIEWLENTVTLK(D)<br>(R)LLALNSLYSPK(I)<br>(R)LLALNSLYSPK(I)<br>(R)MEVQEQEEDISSLIR(S)<br>(R)NcISTVVHQGLIR(I)<br>(R)STVLTPMFVETQASQGTQTR(T)<br>(R)TVGALQVLGTEAQSSLLK(A)<br>(R)TVGALQVLGTEAQSSLLK(A)<br>(R)VVQMLGSLGGQINK(N)<br>(R)YNFPVEVEVPMER(K)<br>(R)YNFPVEVEVPMER(K) |  |  |  |  |
|--|--|--|--|------------------------------------------------------------------------------------------------------------------------------------------------------------------------------------------------------------------------------------------------------------------------------------------------------------------------------------------------------------------------------------------------------------------------------------------------------------------------------------------------------------------------------------------------------------------------------------------------------------------------------------------------------------------------------------------------------------------------|--|--|--|--|

|    |          |        |        |   |                                                                                                                                                                                                                                            |    |                                                                                                                                                                                                                                                                                                                                   |             |   |
|----|----------|--------|--------|---|--------------------------------------------------------------------------------------------------------------------------------------------------------------------------------------------------------------------------------------------|----|-----------------------------------------------------------------------------------------------------------------------------------------------------------------------------------------------------------------------------------------------------------------------------------------------------------------------------------|-------------|---|
| 8  | 4.59E+06 | Q00610 | CLTC   | 9 | (K)AFMTADLPNELIELLEK(I)<br>(K)DTLAEELLQWFLQEEK(R)<br>(K)IYIDSNNNPER(F)<br>(K)VGEQAQVVIIDMNDPSNPIR(R)<br>(R)LAELEEFINGPNNAHIQQVGDR(C)<br>(K)SVNESLNNLFITEEDYQALR(T)<br>(R)GQFSTDELVAEVEKR(N)<br>(R)NNLAGAEELFAR(K)<br>(K)FNALFAQGNYSEAAK(V) | 12 | (K)AFMTADLPNELIELLEK(I)<br>(R)FQSVPAQPGQTSPLLQYFGILLDQGQLNK(Y)<br>(K)DTLAEELLQWFLQEEK(R)<br>(R)LASTLVHLGEYQAAVDGAR(K)<br>(K)IYIDSNNNPER(F)<br>(R)NLQNLILITAIK(A)<br>(K)SVNESLNNLFITEEDYQALR(T)<br>(K)LLLPWLEAR(I)<br>(R)ISGETIFVTAPHEATAGIIGVNR(K)<br>(K)VDKLDASESLR(K)<br>(K)AVDVFFPPEAQNDFPVAMQISEK(H)<br>(K)FNALFAQGNYSEAAK(V) | other       | 3 |
| 6  | 1.04E+07 | Q00839 | HNRNPU | 3 | (R)NFILDQTNVSAAAQR(R)<br>(K)SSGPTSLFAVTVAPPGAR(Q)<br>(K)EKPYFPIPEEYTFIQNVPLEDR(V)                                                                                                                                                          | 4  | (R)NFILDQTNVSAAAQR(R)<br>(R)GYFEYIEENK(Y)<br>(K)EKPYFPIPEEYTFIQNVPLEDR(V)<br>(K)SSGPTSLFAVTVAPPGAR(Q)                                                                                                                                                                                                                             | transporter | 0 |
| 11 | 1.20E+07 | Q01518 | CAP1   | 3 | (R)VENQENSVNLVIEDTELK(Q)<br>(K)AGAAPYVQAFDSLLAGPVAEYLK(I)<br>(K)LSDLLAPISEQIK(E)                                                                                                                                                           | 0  |                                                                                                                                                                                                                                                                                                                                   | other       | 3 |
| 1  | 4.74E+05 | Q01814 | ATP2B2 | 1 | (R)QVVAVTGDGTNDGPALK(K)                                                                                                                                                                                                                    | 1  | (R)QVVAVTGDGTNDGPALK(K)                                                                                                                                                                                                                                                                                                           | transporter | 4 |
| 6  | 5.63E+06 | Q02218 | OGDH   | 4 | (R)VIPEDGPAAQNPENVK(R)                                                                                                                                                                                                                     | 2  | (R)IEQLSPFPDLLK(E)                                                                                                                                                                                                                                                                                                                | enzyme      | 0 |

|   |          |        |        |   |                                                                                                                                                                                               |    |                                                                                                                                                        |                          |   |
|---|----------|--------|--------|---|-----------------------------------------------------------------------------------------------------------------------------------------------------------------------------------------------|----|--------------------------------------------------------------------------------------------------------------------------------------------------------|--------------------------|---|
|   |          |        |        |   | (R)NTNAGAPPGTAYQSPLPSR(G)<br>(K)YAELLVSQGVVNQPEYEEISK(Y)<br>(K)LGFYGLDESDLDK(V)                                                                                                               |    | (R)NTNAGAPPGTAYQSPLPSR(G)                                                                                                                              |                          |   |
| 9 | 3.94E+06 | Q03252 | LMNB2  | 5 | (R)TVLVNADGEEVAMR(T)<br>(K)ALYESELADAR(R)<br>(K)LELEQTYQAK(L)<br>(K)GQSSWGTGESFR(T)<br>(R)AGGPATPLSPTR(L)                                                                                     | 3  | (R)TVLVNADGEEVAmR(T)<br>(K)ALYESELADAR(R)<br>(R)AGGPATPLSPTR(L)                                                                                        | other                    | 2 |
| 6 | 6.96E+06 | Q05524 |        | 2 | (K)DATNVGDEGGFAPNILENK(E)<br>(R)YISPDQLADLYK(G)                                                                                                                                               | 0  |                                                                                                                                                        |                          | 0 |
| 8 | 8.20E+05 | Q05639 | EEF1A2 | 2 | (K)SGDAAIVDMVPGKPMcVESFSDYPPLGR(F)<br>(K)NMITGTSQADcAVLIVAAGVGEFEAGISK(N)                                                                                                                     | 2  | (K)SGDAAIVDMVPGKPMcVESFSDYPPLGR(F)<br>(K)NMITGTSQADcAVLIVAAGVGEFEAGISK(N)                                                                              | translation<br>regulator | 1 |
| 5 | 4.23E+06 | Q07065 | CKAP4  | 2 | (R)LEGLGSSEADQDGLASTVR(S)<br>(R)STLQTMESDIYTEVR(E)                                                                                                                                            | 1  | (K)VQEQVHTLLSQDQAQAAR(L)                                                                                                                               | other                    | 3 |
| 9 | 3.15E+07 | Q08211 | DHX9   | 7 | (R)FSDHVALLSVFQAWDDAR(M)<br>(K)GMTLVTPQLLLFASK(K)<br>(R)ELDALDANDELTPPLGR(I)<br>(K)AIEPPPLDAVIEAEHTLR(E)<br>(K)AENNSEVGASGYGVPGPWDR(G)<br>(R)TYPVQEYFLEDcIQMTHFVPPPK(D)<br>(K)VFDPPVPVGVTK(V) | 11 | (K)AENNSEVGASGYGVPGPWDR(G)<br>(K)AIEPPPLDAVIEAEHTLR(E)<br>(K)GMTLVTPQLLLFASK(K)<br>(K)QPAISQLDPVNER(M)<br>(K)SSVNcPFSSQDMK(Y)<br>(K)TTQVPQFILDIFIQNDRA | enzyme                   | 0 |

|    |          |        |        |   |                                                                                                                 |                                                                                                                |                            |   |
|----|----------|--------|--------|---|-----------------------------------------------------------------------------------------------------------------|----------------------------------------------------------------------------------------------------------------|----------------------------|---|
|    |          |        |        |   |                                                                                                                 | (K)YPSPPFFVFGEK(I)<br>(R)AAEcNIVVTQPR(R)<br>(R)DVVQAYPEVR(I)<br>(R)ISAVSVAER(V)<br>(R)TYPVQEFLEDcIQMTHFVPPK(D) |                            |   |
| 7  | 1.42E+06 | Q08945 | SSRP1  | 3 | (K)VDNIQAGELTEGIWR(R)<br>(R)FYVPPTQEDGVDPVEAFAQNVLSK(A)<br>(K)QGTQYTFSSIER(E)                                   | 0                                                                                                              | other                      | 0 |
| 4  | 5.34E+07 | Q09028 | RBBP4  | 2 | (K)TPSSDVLVFDYTK(H)<br>(K)TVALWDLR(N)                                                                           | 0                                                                                                              | enzyme                     | 0 |
| 2  | 3.39E+06 | Q12769 | NUP160 | 2 | (R)FVSSPQTIVELFFQEVAR(K)<br>(K)LPLTPVFEGLAfk(C)                                                                 | 2                                                                                                              | transporter                | 0 |
| 15 | 3.15E+06 | Q12905 | ILF2   | 3 | (K)ILPTLEAVAALGNK(V)<br>(R)NQDLAPNSAEQASILSLVTK(I)<br>(R)AQDPSEVLTMLTNETGFEISSDATVK(I)                          | 5                                                                                                              | transcription<br>regulator | 0 |
| 10 | 6.04E+06 | Q12906 | ILF3   | 5 | (R)SGGNSYSGGASYNPGSHGGYGGGSGGSSYQGK(Q)<br>(K)VLGETLSVNDPPDVLDLDR(Q)<br>(K)LFPDTPLALDANK(K)<br>(K)AVSDWIDEQEK(G) | 5                                                                                                              | transcription<br>regulator | 0 |

|    |          |        |        |   |                                                                                                                                                                 |   |                                                     |                            |   |
|----|----------|--------|--------|---|-----------------------------------------------------------------------------------------------------------------------------------------------------------------|---|-----------------------------------------------------|----------------------------|---|
|    |          |        |        |   | (K)VLQDmGLPTGAEGR(D)                                                                                                                                            |   | (K)YELISETGGSHDK(R)                                 |                            |   |
| 1  | 5.63E+06 | Q12931 | TRAP1  | 1 | (R)YESSALPSGQLTSLSEYASR(M)                                                                                                                                      | 2 | (K)AFLDALQNQAEASSK(I)<br>(R)YESSALPSGQLTSLSEYASR(M) | enzyme                     | 0 |
| 4  | 1.39E+06 | Q12996 | CSTF3  | 2 | (K)LAAIIPDPVVAPSIVPLK(D)<br>(R)LVAQFPSSGR(F)                                                                                                                    | 0 |                                                     | other                      | 1 |
| 13 | 2.28E+07 | Q13263 | TRIM28 | 5 | (R)LDLDTADSQPPVFK(V)<br>(R)STAPSAASASASAAAASSPAGGGAEALLEHcGVcR(E)<br>(K)LSPPYSSPQEFAQDVGR(M)<br>(K)VFPGSTTEDYNLIVIER(G)<br>(R)GAAAAATGQPGTAPAGTPGAPPLAGMAIVK(E) | 0 |                                                     | transcription<br>regulator | 0 |
| 4  | 4.22E+06 | Q13308 | PTK7   | 2 | (R)GPPIILEATLHLAEIEDMPLFEPR(V)<br>(R)ADGSSLPEWVTDNAGTLHFAR(V)                                                                                                   | 0 |                                                     | kinase                     | 3 |
| 4  | 9.40E+06 | Q13310 | PABPC4 | 2 | (R)SLGYAYVNFQQPADAER(A)<br>(R)ALDTMNFDFVIK(G)                                                                                                                   | 0 |                                                     | other                      | 0 |
| 8  | 3.02E+06 | Q13740 | ALCAM  | 4 | (K)SVQYDDVPEYK(D)<br>(K)EmDPVTQLYTmTSTLEYK(T)<br>(R)SSNTYTLTDVR(R)<br>(R)FVcmLVTEDNVFEAPTIVK(V)                                                                 | 1 | (R)SSPSFSSLHYQDAGNYVcETALQEVEGLK(K)                 | other                      | 4 |
| 2  | 1.14E+06 | Q13751 | LAMB3  | 1 | (R)AVLSSPAVTEQEVAQVASAILSLR(R)                                                                                                                                  | 0 |                                                     | transporter                | 2 |
| 4  | 4.42E+06 | Q13838 | DDX39B | 2 | (K)GLAITFVSDENDAK(I)<br>(R)DVQEIFR(L)                                                                                                                           | 0 |                                                     | enzyme                     | 0 |

|   |          |        |         |    |                                                                                                                                                                                                                                                                                                                                                                                                                                                                                                                                                   |   |                                                  |           |   |
|---|----------|--------|---------|----|---------------------------------------------------------------------------------------------------------------------------------------------------------------------------------------------------------------------------------------------------------------------------------------------------------------------------------------------------------------------------------------------------------------------------------------------------------------------------------------------------------------------------------------------------|---|--------------------------------------------------|-----------|---|
| 4 | 6.72E+06 | Q14126 | DSG2    | 3  | (R)ILDVNDNIPVVENK(V)<br>(R)DMAGAQAAAVALNEEFLLR(N)<br>(K)VVPSFLPVDQGGSLVGR(N)                                                                                                                                                                                                                                                                                                                                                                                                                                                                      | 0 |                                                  | other     | 5 |
| 1 | 3.99E+06 | Q14203 | DCTN1   | 2  | (K)IQLEQVQEWK(S)<br>(K)DQLDETVNVEPLTK(A)                                                                                                                                                                                                                                                                                                                                                                                                                                                                                                          | 0 |                                                  | other     | 0 |
| 8 | 1.51E+06 | Q14204 | DYNC1H1 | 23 | (K)AVDDLNLHSYSLNPIWVVK(L)<br>(K)DFPLNDLLSATELDK(I)<br>(K)DSAIQQQVANLQMK(I)<br>(K)LNTQEIFDDWAR(K)<br>(K)NYMSNPSYNYEIVNR(A)<br>(K)QALETVNDYNPLMK(D)<br>(K)SPLVMDVLNIQGVQR(S)<br>(K)VAAPDVVVPTLDTVR(H)<br>(K)VTDFGDKVEDPTFLNQLQSGVNR(W)<br>(R)ALPDMEVVGLNFSSATPELLK(T)<br>(R)ENFIPTIVNFSAEIISDAIR(E)<br>(R)ESPEVLLTDILK(H)<br>(R)FGNPLLQDVESYDPVLPVLNR(E)<br>(R)FTQDTQPHYIYSPR(E)<br>(R)GIFEALRPLETLPVEGLIR(I)<br>(R)GNEIVLSAGSTPR(I)<br>(R)ILDDDTIITTLLENLK(R)<br>(R)IQGLTVEQAEAVVR(L)<br>(R)KLVPLLEDGGGEAPAALEAALEEK(S)<br>(R)MLSAVSQQVQcIQEALR(E) | 2 | (R)ENFIPTIVNFSAEIISDAIR(E)<br>(R)VQVALEELQDLK(G) | peptidase | 0 |

|   |          |        |        |   |                                                                                                                                         |   |                                                                                                                                                                                                  |                          |   |
|---|----------|--------|--------|---|-----------------------------------------------------------------------------------------------------------------------------------------|---|--------------------------------------------------------------------------------------------------------------------------------------------------------------------------------------------------|--------------------------|---|
|   |          |        |        |   | (R)SIPLDEGEDEAQR(R)<br>(R)VLLTTQGVDISK(M)<br>(R)WTDENIDTVALK(H)                                                                         |   |                                                                                                                                                                                                  |                          |   |
| 3 | 9.61E+05 | Q14240 | EIF4A2 | 1 | (R)GIYAYGFEKPSAIQQR(A)                                                                                                                  | 0 |                                                                                                                                                                                                  | translation<br>regulator | 0 |
| 8 | 2.56E+06 | Q14247 | CTTN   | 3 | (K)NASTFEDVTQVSSAYQK(T)<br>(R)YGLFPANYVELR(Q)<br>(R)GPVSGTEPEPVYSMEAADYR(E)                                                             | 8 | (K)TQTPPVSPAPQPTEER(L)<br>(R)GPVSGTEPEPVYSMEAADYR(E)<br>(R)VDQSAVGFEYQGK(T)<br>(K)TQTPPVSPAPQPTEER(L)<br>(K)NASTFEDVTQVSSAYQK(T)<br>(R)YGLFPANYVELR(Q)<br>(R)ENVFQEHQTLK(E)<br>(R)QDSAAGVFDYK(E) | other                    | 2 |
| 9 | 4.51E+06 | Q14697 | GANAB  | 5 | (R)DENSVELTmAEGPYK(I)<br>(R)QYASLTGTQALPPLFSLGYHQS(R)(W)<br>(K)MmDYLQGSGETPQTDVR(W)<br>(R)FGAVWTGDNTAEWDHLK(I)<br>(K)DPAEGDGAQPEETPR(D) | 5 | (K)mmDYLQGSGETPQTDVR(W)<br>(R)QYASLTGTQALPPLFSLGYHQS(R)(W)<br>(R)DENSVELTmAEGPYK(I)<br>(R)VSQGSKDPAEGDGAQPEETPR(D)<br>(R)LSFQHDPETSVLVL(R)(K)                                                    | enzyme                   | 1 |
| 7 | 3.61E+06 | Q14764 | MVP    | 3 | (R)VASGSPGEGISPOQAQAPQAGDNHVVPLR(-)<br>(R)QAIPLDENEGIYQDVK(T)<br>(R)LAQDPFPLYPGEVLEK(D)                                                 | 0 |                                                                                                                                                                                                  | other                    | 0 |

|    |          |        |        |   |                                                                                                                            |    |                                                                                                                                           |             |   |
|----|----------|--------|--------|---|----------------------------------------------------------------------------------------------------------------------------|----|-------------------------------------------------------------------------------------------------------------------------------------------|-------------|---|
| 5  | 2.34E+06 | Q14956 | GPNMB  | 2 | (K)DVYVVTDQIPVFVTMFQK(N)<br>(R)WNFIYVFHTLGQYFQK(L)                                                                         | 0  |                                                                                                                                           | enzyme      | 3 |
| 3  | 2.69E+06 | Q14974 | KPNB1  | 2 | (K)GALQYLVPILTQTLTK(Q)<br>(R)AAVENLPTFLVELSR(V)                                                                            | 4  | (R)AAVENLPTFLVELSR(V)<br>(K)VQHQDALQISDVVMASLLR(M)<br>(K)SDYDMVDYLNELR(E)<br>(R)DTAAWTVGR(I)                                              | transporter | 0 |
| 3  | 4.57E+06 | Q15029 | EFTUD2 | 2 | (R)VPAGNWVLIEGVDQPIVK(T)<br>(K)IAVEPVNPSELPK(M)<br>(R)VPAGNWVLIEGVDQPIVK(T)                                                | 3  | (K)IAVEPVNPSELPK(M)<br>(K)AFIPAIDSFGFETDLR(T)<br>(R)VPAGNWVLIEGVDQPIVK(T)                                                                 | enzyme      | 0 |
| 6  | 4.58E+06 | Q15046 | KARS   | 2 | (K)VTYHPDGPEGQAYDVFDPFR(R)<br>(K)ENVATTDLTLETTVGTSV(-)                                                                     | 0  |                                                                                                                                           | enzyme      | 2 |
| 12 | 2.50E+07 | Q15084 | PDIA6  | 3 | (K)LAAVDATVNQVLASR(Y)<br>(R)GSTAPVGGGAFPTIVER(E)<br>(R)ALDLFSDNAPPELLEIINEDIAK(R)                                          | 5  | (K)LAAVDATVNQVLASR(Y)<br>(R)TGEAIVDAALSALR(Q)<br>(R)ALDLFSDNAPPELLEIINEDIAK(R)<br>(R)GSTAPVGGGAFPTIVER(E)                                 | enzyme      | 2 |
| 1  | 2.81E+06 | Q15149 | PLEC   | 5 | (K)VLALPEPSAAPTLR(S)<br>(R)LLDPEDVDVPQPDEK(S)<br>(K)EAQAVPATLPELEATK(A)<br>(R)LLDAQLATGGIVDPR(L)<br>(R)QEQIQAMPLADSQAVR(E) | 22 | (K)AGVAAPATQVAQVTLQSVQR(R)<br>(K)AYS DPSTGEPATYGELQQR(C)<br>(K)EAQAVPATLPELEATK(A)<br>(K)EQELQQLTQQEQSVLDQLR(G)<br>(K)GIYQSLEGAVQAGQLK(V) | other       | 1 |

|    |          |        |      |   |                                                                               |                                                                                                                                                                                                                                                                                                                                                                                                                                            |       |   |
|----|----------|--------|------|---|-------------------------------------------------------------------------------|--------------------------------------------------------------------------------------------------------------------------------------------------------------------------------------------------------------------------------------------------------------------------------------------------------------------------------------------------------------------------------------------------------------------------------------------|-------|---|
|    |          |        |      |   |                                                                               | (K)LEQLFQDEVAK(A)<br>(K)NLLDEELQR(L)<br>(K)VLALPEPSPAAPTLR(S)<br>(K)VQSGSESVIQEYVDLR(T)<br>(R)APVPASELLASGVLSR(A)<br>(R)DALDGPAAEAPEHSFDGLR(R)<br>(R)DPYTGQSVSLFQALK(K)<br>(R)LEDLLQDAQDEK(E)<br>(R)LLDAQLSTGGIVDPSK(S)<br>(R)LLDPEDVDVPQPDEK(S)<br>(R)LQEAGILSAEELQR(L)<br>(R)QEQIQAMPLADSQAVR(E)<br>(R)QEEELLAEEENQR(L)<br>(R)QTNLENLDQAFSVAER(D)<br>(R)SLVPAAELLESR(V)<br>(R)SSSVGSSSSYPISPAVSR(T)<br>(R)TQLASWSDPTEETGPVAGILDTETLEK(V) |       |   |
| 11 | 5.34E+06 | Q15233 | NONO | 3 | (R)NLPQYVSNELLEAFSVFGQVER(A)<br>(R)FAQPGSFEYAYMR(W)<br>(R)LFVGNLPPDITEEEMR(K) | 0                                                                                                                                                                                                                                                                                                                                                                                                                                          | other | 0 |

|   |          |        |        |   |                                                                                                                                         |   |                                                                                                                                                                  |                            |   |
|---|----------|--------|--------|---|-----------------------------------------------------------------------------------------------------------------------------------------|---|------------------------------------------------------------------------------------------------------------------------------------------------------------------|----------------------------|---|
| 7 | 7.12E+06 | Q15393 | SF3B3  | 5 | (K)LGAVFNQVAFPLQYTPR(K)<br>(R)TVLDPVTGDLSDTR(T)<br>(R)ELAAEMAAFLNENLPESIFGAPK(A)<br>(R)LPPNTNDEVDEDPTGNK(A)<br>(R)WVTTASLLDYDTVAGADK(F) | 6 | (R)ELAAEMAAFLNENLPESIFGAPK(A)<br>(R)TVLDPVTGDLSDTR(T)<br>(R)LPPNTNDEVDEDPTGNK(A)<br>(R)WVTTASLLDYDTVAGADK(F)<br>(K)LGAVFNQVAFPLQYTPR(K)<br>(R)NENQLIIFADDTYPR(W) | other                      | 0 |
| 5 | 6.18E+05 | Q15436 | SEC23A | 2 | (R)MVVPVAAALFTPLK(E)<br>(R)NWADAQTQIQNIAASFDQEAAAILMAR(L)                                                                               | 0 |                                                                                                                                                                  | transporter                | 1 |
| 5 | 1.03E+06 | Q16181 | 7-Sep  | 2 | (K)IYEFPETDDEEENK(L)<br>(K)FEDYLNAESR(V)                                                                                                | 0 |                                                                                                                                                                  | other                      | 0 |
| 3 | 3.68E+06 | Q16531 | DDB1   | 2 | (R)IEVQDTSGGTTALRPSASTQALSSSVSSSK(L)<br>(K)EMLGGEIIPR(S)                                                                                | 0 |                                                                                                                                                                  | other                      | 0 |
| 4 | 5.34E+07 | Q16576 | RBBP7  | 2 | (K)TPSSDVLVFDYTK(H)<br>(K)TVALWDLR(N)                                                                                                   | 2 | (K)IGEEQSAEDAEDGPPELLFIHGGHTAK(I)<br>(K)TPSSDVLVFDYTK(H)                                                                                                         | transcription<br>regulator | 0 |
| 1 | 4.74E+05 | Q16720 | ATP2B3 | 1 | (R)QVVAVTGDGTNDGPALK(K)                                                                                                                 | 1 | (R)QVVAVTGDGTNDGPALK(K)                                                                                                                                          | transporter                | 4 |
| 4 | 8.28E+06 | Q16891 | IMMT   | 2 | (K)TSSAETPTIPLGSAVEAIK(A)<br>(R)ELDSITPEVLPGWK(G)                                                                                       | 6 | (R)GIEQAVQSHAVAEER(K)<br>(K)LFEMVLGPAAYNVPLPK(K)<br>(R)ELDSITPEVLPGWK(G)<br>(K)TSSAETPTIPLGSAVEAIK(A)<br>(K)SEFEQNLSEK(L)<br>(R)ERPPEEVAAR(L)                    | other                      | 1 |

|   |          |        |          |   |                                                                                                                                                                   |   |                                                                                                                   |                            |   |
|---|----------|--------|----------|---|-------------------------------------------------------------------------------------------------------------------------------------------------------------------|---|-------------------------------------------------------------------------------------------------------------------|----------------------------|---|
| 4 | 4.83E+06 | Q5JTZ9 | AARS2    | 2 | (R)LDVTTQTPLTPEQLR(A)<br>(K)APPGFLGSLVPVVVETLGDAYPELQR(N)                                                                                                         | 0 |                                                                                                                   | enzyme                     | 0 |
| 0 | 3.56E+05 | Q5T4S7 | UBR4     | 2 | (K)NAAQELATLLSLPAPASVQQQSK(S)<br>(K)LEQVSSDEGIGTLAENLLEALR(E)                                                                                                     | 0 |                                                                                                                   | other                      | 2 |
| 1 | 7.65E+05 | Q5VYK3 | KIAA0368 | 2 | (K)ELQLEYLLGAFESLGK(A)<br>(K)VNDVVPWVLDVILNK(H)                                                                                                                   | 0 |                                                                                                                   | other                      | 0 |
| 4 | 2.23E+06 | Q6P2Q9 | PRPF8    | 6 | (R)TDMIQALGGVEGILEHTLFK(G)<br>(R)DINLQDEDWNEFNDINK(I)<br>(K)SQEPLPDDDEEFELPEFVEPFLK(D)<br>(R)YIQPWESEFIDSQR(V)<br>(K)VPGLPTPIENMILR(Y)<br>(K)ATEPQMVLFNLYDDWLK(T) | 4 | (R)TDMIQALGGVEGILEHTLFK(G)<br>(R)YIQPWESEFIDSQR(V)<br>(K)NNVNVASLTQSEIR(D)<br>(R)ASEMAGPPQMPNDFLSFQDIATEAAHPIR(L) | other                      | 0 |
| 7 | 1.51E+06 | Q7KZF4 | SND1     | 4 | (R)ALLPDYYLVTVMLSGIK(C)<br>(K)VWAHYEEQPVEEVMPVLEEK(E)<br>(R)NDIASHPPVEGSYAPR(R)<br>(R)EADGSETPEPFAAEAK(F)                                                         | 2 | (R)EADGSETPEPFAAEAK(F)<br>(R)DYVAPTANLDQK(D)                                                                      | enzyme                     | 0 |
| 2 | 1.83E+06 | Q7Z6Z7 | HUWE1    | 7 | (K)FVESILSNNTTDDHcQEFVNQK(G)<br>(R)LLGPSAAADILQLSSSLPLQSR(G)<br>(R)LLSLISIALPENK(V)<br>(R)LGSSGLGSASSIQAAVR(Q)<br>(R)IPIPLMDYILNVMK(F)                            | 0 |                                                                                                                   | transcription<br>regulator | 1 |

|   |          |        |          |   |                                                                                                                                                               |   |                                                     |                            |   |
|---|----------|--------|----------|---|---------------------------------------------------------------------------------------------------------------------------------------------------------------|---|-----------------------------------------------------|----------------------------|---|
|   |          |        |          |   | (K)GNDTPLALESTNTEK(E)<br>(K)LPGGVQNFPPQFSALR(F)                                                                                                               |   |                                                     |                            |   |
| 8 | 1.64E+07 | Q86VP6 | CAND1    | 6 | (K)IDLRPVLGEGVPILASFLR(K)<br>(K)ALTLIAGSPLK(I)<br>(R)AIScMGQIicNLGDNLGSDLPNTLQIFLER(L)<br>(K)FTISDHPQPIDPLLK(N)<br>(K)ITSEALLVTQQLVK(V)<br>(K)ADVFHAYLSLLK(Q) | 0 |                                                     | transcription<br>regulator | 0 |
| 3 | 8.20E+05 | Q86WB0 | ZC3HC1   | 1 | (R)FGmLPLDEPAILVSEFLDR(F)                                                                                                                                     | 0 |                                                     | other                      | 1 |
| 5 | 6.70E+06 | Q8N163 | KIAA1967 | 3 | (K)EAAPDAGAEPITADSDPAYSSK(V)<br>(K)VLLSSPGLEELYR(C)<br>(K)AAYNPGQAVPWNAV(K)(V)                                                                                | 2 | (K)EAAPDAGAEPITADSDPAYSSK(V)<br>(K)VLLSSPGLEELYR(C) | peptidase                  | 0 |
| 8 | 3.00E+07 | Q8NC51 | SERBP1   | 2 | (R)FDQLFDDSDPFEVLK(A)<br>(K)SSASAPDVDDPEAFPALA(-)                                                                                                             | 0 |                                                     | other                      | 1 |
| 4 | 3.01E+06 | Q8WUM4 | PDCD6IP  | 2 | (R)DTIVLLcKPELNAAIIPSANPAK(T)<br>(R)SVIEQGGIQTVDQLIK(E)                                                                                                       | 0 |                                                     | other                      | 0 |
| 7 | 2.53E+06 | Q92499 | DDX1     | 3 | (K)GHVDILAPTVQELAALEK(E)<br>(R)FLVLDEADGLLSQGYSDFINR(M)<br>(K)EAQTSFLHLGYLPNQLFR(T)                                                                           | 0 |                                                     | enzyme                     | 0 |
| 2 | 4.51E+05 | Q92616 | GCN1L1   | 3 | (K)VLPLEALVTDAGEVTEAGK(A)                                                                                                                                     | 0 |                                                     | translation<br>regulator   | 0 |

|    |          |        |       |   |                                                                                                                                                     |   |                                                                                                         |             |   |
|----|----------|--------|-------|---|-----------------------------------------------------------------------------------------------------------------------------------------------------|---|---------------------------------------------------------------------------------------------------------|-------------|---|
|    |          |        |       |   | (K)LVLPSLLAALEESWR(T)<br>(R)NPEILAIAPVLLDALTDPSR(K)                                                                                                 |   |                                                                                                         |             |   |
| 6  | 3.71E+06 | Q92841 | DDX17 | 3 | (R)ELAQVQVQVADDYGK(C)<br>(K)GTAYTFFTPGNLK(Q)<br>(K)APILIATDVASR(G)                                                                                  | 2 | (R)ELAQVQVQVADDYGK(C)<br>(K)VLEEQANQAINPK(L)                                                            | enzyme      | 0 |
| 8  | 1.90E+06 | Q92945 | KHSRP | 4 | (R)IINDLLQSLR(S)<br>(K)VQISPDSSGGLPER(S)<br>(K)IGGDAATTVNNSTPDFGGGQK(R)<br>(K)IGQQPQQPGAPPQQDYTK(A)                                                 | 4 | (K)VQISPDSSGGLPER(S)<br>(K)IGGDAATTVNNSTPDFGGGQK(R)<br>(K)AINQQTGAFVEISR(Q)<br>(K)IGQQPQQPGAPPQQDYTK(A) | enzyme      | 0 |
| 3  | 3.80E+06 | Q92973 | TNPO1 | 2 | (K)GELQNWPDLLPK(L)<br>(K)SECLNNIGDSSPLIR(A)                                                                                                         | 0 |                                                                                                         | transporter | 0 |
| 4  | 8.83E+06 | Q93034 | CUL5  | 2 | (K)DLEEHIISAGLADMVAAAETITTDSEK(Y)<br>(R)TLWSLVAFPK(L)                                                                                               | 0 |                                                                                                         | ion channel | 0 |
| 3  | 2.42E+06 | Q96QK1 | VPS35 | 2 | (K)IPVDTYNNILTVLK(L)<br>(R)SEDPDQQYLINTAR(K)                                                                                                        | 0 |                                                                                                         | transporter | 1 |
| 13 | 5.23E+06 | Q96RQ3 | MCCC1 | 5 | (R)IYAEDPSNNFMPVAGPLVHLSTPR(A)<br>(R)SEQEFQEQLESAR(R)<br>(K)SIMAAAGVPVVEGYHGEDQSDQcLK(E)<br>(K)YLVSSVSQETQGGPLAPMTGTIEK(V)<br>(K)QEGIIFIGPPPSAIR(D) | 2 | (R)IYAEDPSNNFMPVAGPLVHLSTPR(A)<br>(K)IIIEAPAPGIK(S)                                                     | enzyme      | 0 |

|    |          |        |       |   |                                                                                                                                                   |   |                                                                                               |        |   |
|----|----------|--------|-------|---|---------------------------------------------------------------------------------------------------------------------------------------------------|---|-----------------------------------------------------------------------------------------------|--------|---|
| 3  | 3.25E+06 | Q99460 | PSMD1 | 2 | (-)MITSAGIISLLDEDEPQLK(E)<br>(K)EALQLMATYLPK(D)                                                                                                   | 0 |                                                                                               | other  | 0 |
| 8  | 1.64E+06 | Q99798 | ACO2  | 4 | (K)DINQEVYNFLATAGAK(Y)<br>(R)WVVIGDENYEGGSSR(E)<br>(R)NAVQTQEFGPVPDTAR(Y)<br>(R)VGLIGScTNSSYEDMGR(S)                                              | 2 | (K)QGLLPLTFADPADYNK(I)<br>(K)SQFTITPGSEQIR(A)                                                 | enzyme | 0 |
| 18 | 7.68E+06 | Q99832 | CCT7  | 5 | (K)LPIGDVATQYFADR(D)<br>(K)EGTDSSQGIPQLVSNISAcQVIAEAVR(T)<br>(K)SQDAEVDGTTSTLLAAEFLK(Q)<br>(R)INALTAASEAAcLIVSVDETIK(N)<br>(R)QLcDNAGFDATNILNK(L) | 0 |                                                                                               | other  | 0 |
| 2  | 3.76E+06 | Q9BSJ8 | ESYT1 | 2 | (R)LLVPLVPDLQDVAQLR(S)<br>(R)ELPAWVSFPDVEK(A)                                                                                                     | 4 | (R)LEWLSLLSDAEK(L)<br>(R)FFLQDPQSQELDVQVK(D)<br>(R)LLVPLVPDLQDVAQLR(S)<br>(R)ELPAWVSFPDVEK(A) | other  | 2 |
| 14 | 3.26E+06 | Q9BY67 | CADM1 | 3 | (K)GADDAADADTAIINAEGGQNNSEEK(K)<br>(K)SDDSVIQLLNPNR(Q)<br>(R)EGDALELTcEAIGKPQPMVTWVR(V)                                                           | 0 |                                                                                               | other  | 5 |
| 8  | 3.35E+06 | Q9H845 | ACAD9 | 3 | (K)IPVENILGEVGDGFK(V)<br>(R)ILLIFEGTNEILR(M)                                                                                                      | 0 |                                                                                               | enzyme | 0 |

|    |          |        |         |   |                                                                              |   |                                                                               |                            |   |
|----|----------|--------|---------|---|------------------------------------------------------------------------------|---|-------------------------------------------------------------------------------|----------------------------|---|
|    |          |        |         |   | (K)EVFPFPEVSQDELNEINQFLGPVEK(F)                                              |   |                                                                               |                            |   |
| 3  | 1.21E+06 | Q9HAV4 | XPO5    | 2 | (K)VFLEELMAPVASIWLSQDMHR(V)<br>(R)EEIPVNDGIELLMVLNFDTK(D)                    | 0 |                                                                               | transporter                | 0 |
| 8  | 3.67E+06 | Q9HCC0 | MCCC2   | 3 | (R)NIPLFLQNITGFMVGR(E)<br>(R)ISVMGGEQAAANVLATITK(D)<br>(R)VWDDGIIDPADTR(L)   | 0 |                                                                               | enzyme                     | 0 |
| 6  | 7.93E+05 | Q9NVE7 | PANK4   | 2 | (R)LERPLVDLPLLLDPPSYVPDVTDLTDDALAR(K)<br>(K)AVSAVLESDPYFGFEEAK(R)            | 0 |                                                                               | kinase                     | 0 |
| 8  | 2.13E+06 | Q9NZI8 | IGF2BP1 | 3 | (K)TVNELQNLTAEEVVVPR(D)<br>(K)LYIGNLNESVTPADLEK(V)<br>(K)ITISSLQDLTLYNPER(T) | 0 |                                                                               | translation<br>regulator   | 2 |
| 1  | 5.53E+06 | Q9UI47 | CTNNA3  | 1 | (K)NLMNAVVTQVK(A)                                                            | 0 |                                                                               | other                      | 2 |
| 4  | 2.53E+05 | Q9UQ80 | PA2G4   | 1 | (K)TAENATSGETLEENEAGD(-)                                                     | 0 |                                                                               | transcription<br>regulator | 0 |
| 4  | 4.75E+06 | Q9Y262 | EIF3L   | 2 | (K)LAGFLDLTEQEFR(I)<br>(K)VYEIQDIYENSWTK(L)                                  | 0 |                                                                               | other                      | 0 |
| 6  | 1.23E+06 | Q9Y2X3 | NOP58   | 2 | (K)FQDTAEALAAFTALMEGK(I)<br>(R)YDAFGEDSSSAMGVENR(A)                          | 3 | (K)FQDTAEALAAFTALMEGK(I)<br>(R)YDAFGEDSSSAMGVENR(A)<br>(K)VDTMIVQAISLLDDLK(E) | enzyme                     | 0 |
| 12 | 5.50E+06 | Q9Y4L1 | HYOU1   | 8 | (K)NINADEAAAMGAVYQAAALSK(A)<br>(K)EEAEAPVEDGSQPPPEPK(G)                      | 9 | (K)AANSLEAFIFETQDK(L)<br>(K)DAVITVPVFFNQAER(R)                                | other                      | 1 |

|    |          |        |         |   |                                                                                                                                                 |   |                                                                                                                                                                                                                   |                            |   |
|----|----------|--------|---------|---|-------------------------------------------------------------------------------------------------------------------------------------------------|---|-------------------------------------------------------------------------------------------------------------------------------------------------------------------------------------------------------------------|----------------------------|---|
|    |          |        |         |   | (K)LGNTISLFGGGTTPDAK(E)<br>(K)LYQPEYQEVSTEEQR(E)<br>(R)SLAEDFAEQPIK(D)<br>(R)DAVVYPILVEFTR(E)<br>(K)AANSLEAFIFETQDK(L)<br>(K)DAVITVPVFFNQAER(R) |   | (K)DEPGEQVELKEEAPVEDGSQPPPEPK(G)<br>(K)LGNTISLFGGGTTPDAK(E)<br>(K)LYQPEYQEVSTEEQR(E)<br>(K)NINADEAAAAMGAVYQAAASK(A)<br>(R)DAVVYPILVEFTR(E)<br>(R)VESVFETLVEDSAEEESTLTK(L)<br>(R)VPGPVQQALQSAEMSLDEIEQVILVGGATR(V) |                            |   |
| 4  | 3.32E+06 | Q9Y678 | COPG    | 3 | (K)TLEEAVGNIVK(F)<br>(K)ELAPAVSVLQLFcSSPK(A)<br>(R)QEIFQEQLAAVPEFR(G)                                                                           | 0 |                                                                                                                                                                                                                   | transporter                | 0 |
| 10 | 1.04E+07 | O00116 | AGPS    | 0 |                                                                                                                                                 | 4 | (K)GFDPNQLSVATLLFEGDR(E)<br>(R)AASAATAAPTATPAAQESGTIPK(K)<br>(R)GISDPLTVFEQTEAAAR(E)<br>(K)FGGLAAGEDNGQR(G)                                                                                                       | enzyme                     | 2 |
| 7  | 9.93E+06 | O00469 | PLOD2   | 0 |                                                                                                                                                 | 3 | (K)IVGPEENLSQAEAR(N)<br>(K)IFTENIVEQPcPDVFWFPIFSEK(A)<br>(R)ISGGYENVPTDDIHmK(Q)                                                                                                                                   | enzyme                     | 1 |
| 2  | 2.45E+06 | O60264 | SMARCA5 | 0 |                                                                                                                                                 | 2 | (R)TEQEEDEELLTESSK(A)<br>(K)IDEAESLNDEELEEK(E)                                                                                                                                                                    | transcription<br>regulator | 0 |
| 2  | 1.40E+07 | O60488 | ACSL4   | 0 |                                                                                                                                                 | 1 | (R)LSPEPWTPETGLVTDAFK(L)                                                                                                                                                                                          | enzyme                     | 2 |
| 17 | 2.04E+07 | O60506 | SYNCRIP | 0 |                                                                                                                                                 | 7 | (R)DLFEDELVPLEK(A)                                                                                                                                                                                                | other                      | 0 |

|   |          |        |        |   |  |                                                                                                                                                        |             |   |
|---|----------|--------|--------|---|--|--------------------------------------------------------------------------------------------------------------------------------------------------------|-------------|---|
|   |          |        |        |   |  | (K)VTEGLTDVILYHQPDDK(K)<br>(R)NLANTVTTEEILEK(A)<br>(K)VWGNVGTVEWADPIEDPDPEVMAK(V)<br>(K)SENQEFYQDTFGQQWK(-)<br>(K)AGPIWDLR(L)<br>(K)EFNEDGALAVLQQFK(D) |             |   |
| 7 | 2.43E+06 | O60568 | PLOD3  | 0 |  | 3<br>(R)YDTEHLHPDLWQIFDNPVDWK(E)<br>(R)IFQNLNGALDEVVLK(F)<br>(R)NVAYDTLPIVVHNGPTK(L)                                                                   | enzyme      | 1 |
| 5 | 3.47E+06 | O60716 | CTNND1 | 0 |  | 3<br>(R)DMDLTEVITGTLWNLSHDSIK(M)<br>(R)YQEAAPNVANNTGPHAAScFGAK(K)<br>(R)GYELLFQPEVVR(I)                                                                | other       | 2 |
| 5 | 1.08E+07 | O75694 | NUP155 | 0 |  | 4<br>(R)NSQFAGGPLGNPNTTAK(V)<br>(R)EITAIESSVPcQLLESVLQELK(G)<br>(R)IMGNIWDASLVVER(I)<br>(R)VASVSQNAIVSAAGNIAR(T)                                       | transporter | 2 |
| 0 | 1.56E+07 | O75923 | DYSF   | 0 |  | 2<br>(K)NLVDPFVEVSFAGK(K)<br>(R)AEDLPQMDDAFSQTVK(E)                                                                                                    | other       | 4 |
| 4 | 1.34E+07 | O95573 | ACSL3  | 0 |  | 2<br>(R)IGYSSPQTLADQSSK(I)<br>(R)LSPEPWTPETGLVTDFAK(L)                                                                                                 | enzyme      | 2 |

|    |          |        |       |   |  |   |                                                                                                                                                           |        |   |
|----|----------|--------|-------|---|--|---|-----------------------------------------------------------------------------------------------------------------------------------------------------------|--------|---|
| 4  | 1.72E+07 | O95831 | AIFM1 | 0 |  | 2 | (K)AALSASEGEEVPQDK(A)<br>(R)ALGTEVIQLFPEK(G)                                                                                                              | enzyme | 1 |
| 11 | 1.25E+07 | P04040 | CAT   | 0 |  | 3 | (R)GPLLVQDVVFTDEMAHFDR(E)<br>(K)ADVLTTGAGNPVGDK(L)<br>(R)NPVNYFAEVEQIAFDPSNmPPGIEASPDK(M)                                                                 | enzyme | 2 |
| 5  | 5.93E+06 | P04843 | RPN1  | 0 |  | 2 | (R)ATSFLLALEPELEAR(L)<br>(K)VTAEVVLAHLGGGSTSR(A)                                                                                                          | enzyme | 2 |
| 9  | 1.46E+08 | P07237 | P4HB  | 0 |  | 3 | (K)HNQLPLVIEFTEQTAPK(I)<br>(K)QFLQAAEAIDDIPFGITSNSDVFSK(Y)<br>(K)ENLLDFIK(H)                                                                              | enzyme | 2 |
| 1  | 7.39E+06 | P12270 | TPR   | 0 |  | 3 | (K)TLSSVQNEVQEALQR(A)<br>(R)NLQEQTVLQSELSR(L)<br>(K)EGVQGPLNVSLSEEGK(S)                                                                                   | other  | 1 |
| 3  | 1.28E+07 | P12830 | CDH1  | 0 |  | 2 | (R)DTANWLEINPDTGAISTR(A)<br>(K)GQVPENEANVVITTLK(V)                                                                                                        | other  | 5 |
| 21 | 1.73E+07 | P13667 | PDIA4 | 0 |  | 8 | (K)GESDPAYQQYQDAANNLR(E)<br>(R)ENAIEDEEEEEEDDDEEEDDLEVK(E)<br>(K)FamEPEEFSDTLR(E)<br>(K)VEGFPTIYFAPSGDK(K)<br>(K)VDATAETDLAK(R)<br>(K)YGIVDYMIEQSGPPSK(E) | enzyme | 1 |

|    |          |        |        |   |  |                                                                                                                  |                          |   |
|----|----------|--------|--------|---|--|------------------------------------------------------------------------------------------------------------------|--------------------------|---|
|    |          |        |        |   |  | (K)DFPEYTFIAIDEEDYAGEVK(D)<br>(R)EVSQPDWTPPPEVTLVLTK(E)                                                          |                          |   |
| 5  | 7.55E+06 | P13674 | P4HA1  | 0 |  | 2<br>(K)SAWLSGYENPVVSR(I)<br>(R)LNTEWSELENVLK(D)                                                                 | enzyme                   | 0 |
| 8  | 1.86E+06 | P14923 | JUP    | 0 |  | 3<br>(K)TLVTQNSGVEALIHAILR(A)<br>(R)LNTIPLFVQLLYSSVENIQR(V)<br>(K)EAADAIDAEGASAPLMELLHSR(N)                      | other                    | 3 |
| 10 | 2.51E+06 | P23219 | PTGS1  | 0 |  | 3<br>(R)VPDASQDDGPAVERPSTEL(-)<br>(K)ALGHGVDLGHYGDNLER(Q)<br>(K)EmAAELEELYGDIDALEFYPGLLLEK(C)                    | enzyme                   | 3 |
| 4  | 5.03E+06 | P26639 | TARS   | 0 |  | 2<br>(K)VNNVVWDLDRPLEEDcTLELLK(F)<br>(R)AELNPWPEYIYTR(L)                                                         | enzyme                   | 0 |
| 13 | 3.13E+07 | P26641 | EEF1G  | 0 |  | 4<br>(K)KAAAPAPEEEEmDEcEQALAAEPK(A)<br>(R)KLDPGSEETQTLVR(E)<br>(K)YSNEDTLSVALPYFWEHFDK(D)<br>(K)LDPGSEETQTLVR(E) | translation<br>regulator | 0 |
| 20 | 2.27E+07 | P29966 | MARCKS | 0 |  | 3<br>(K)GEPAAAAPEAGASPVEK(E)<br>(K)GEEAAERPGEAAVASSPSK(A)<br>(K)EELQANGSAPAADKEEPAAAGSGAASPSAAEK(G<br>)          | other                    | 3 |
| 2  | 1.04E+07 | P34896 | SHMT1  | 0 |  | 1<br>(R)ISATSIFFESMPYK(L)                                                                                        | enzyme                   | 0 |

|    |          |        |          |   |  |   |                                                                                      |                            |   |
|----|----------|--------|----------|---|--|---|--------------------------------------------------------------------------------------|----------------------------|---|
| 5  | 1.50E+07 | P34897 | SHMT2    | 0 |  | 2 | (K)TGLIDYNQLALTAR(L)<br>(R)ISATSIFFESMPYK(L)                                         | enzyme                     | 1 |
| 6  | 2.92E+06 | P34932 | HSPA4    | 0 |  | 3 | (R)EFSITDVVPYPISLR(W)<br>(K)TSTVDLPIENQLLWQIDR(E)<br>(K)SNLAYDIVQLPTGLTGIK(V)        | other                      | 0 |
| 4  | 3.25E+06 | P35222 | CTNNB1   | 0 |  | 2 | (K)LLNDEDQVVVNK(A)<br>(R)GLNTIPLFVQLLYSPIENIQR(V)                                    | transcription<br>regulator | 2 |
| 5  | 5.20E+06 | P38606 | ATP6V1A  | 0 |  | 2 | (K)EILQEEEDLAEIVQLVGK(A)<br>(R)TALVANTSnmPVAAR(E)                                    | transporter                | 1 |
| 7  | 5.00E+06 | P43304 | GPD2     | 0 |  | 3 | (R)LAFLNVQAAEEALPR(I)<br>(R)LVQDYGLESEVAQHAAATYGD(K)<br>(R)YGAATANYMEVVSLLK(K)       | enzyme                     | 1 |
| 6  | 1.71E+07 | P48449 | LSS      | 0 |  | 4 | (R)LSAAEDPLVQSLR(Q)<br>(R)NPDGGGFATYETK(R)<br>(R)ILGVGPDDPDVLR(A)<br>(R)FSQLYPER(A)  | enzyme                     | 1 |
| 6  | 2.77E+06 | P49368 | CCT3     | 0 |  | 2 | (R)NVLLDPQLVPGGGASEMAVAHALTEK(S)<br>(K)ALDDmISTLK(K)                                 | other                      | 2 |
| 19 | 3.36E+07 | P50454 | SERPINH1 | 0 |  | 5 | (R)SALQSINEWAAQTDDGK(L)<br>(K)DQAVENILVSPVVVASSLGLVSLGGK(A)<br>(R)LYGPSSVSFADDFVR(S) | other                      | 2 |

|   |          |        |         |   |                                               |                                                                                                                                                                                                                                         |        |   |
|---|----------|--------|---------|---|-----------------------------------------------|-----------------------------------------------------------------------------------------------------------------------------------------------------------------------------------------------------------------------------------------|--------|---|
|   |          |        |         |   |                                               | (K)AVLSAEQLR(D)<br>(R)DEEVHAGLGELLR(S)                                                                                                                                                                                                  |        |   |
| 6 | 3.14E+07 | P51659 | HSD17B4 | 0 |                                               | 3<br>(R)VLQQFADNDVSR(F)<br>(K)AVANYDSVEEGEK(V)<br>(K)IcDFENASKPQSIQESTGSIIEVLSK(I)                                                                                                                                                      | enzyme | 0 |
| 0 | 5.86E+06 | P58107 | EPPK1   | 0 |                                               | 1<br>(R)EELLAIEFGSGTLDLPALTR(R)                                                                                                                                                                                                         | other  | 0 |
| 2 | 5.00E+06 | P69849 |         | 2 | (K)SSIDSEPALVLGPLK(S)<br>(R)DGENYVLLDSTLPR(S) | 0                                                                                                                                                                                                                                       | other  | 2 |
| 3 | 5.56E+06 | Q01970 | PLCB3   | 0 |                                               | 2<br>(R)LVAGQQQVLQQLAEEEPK(L)<br>(R)DDLIASILSEVAPTPLDEL(R)                                                                                                                                                                              | enzyme | 1 |
| 4 | 1.83E+07 | Q02809 | PLOD1   | 0 |                                               | 2<br>(R)FLGSGGFIGYAPNLSK(L)<br>(R)VGWVNVPIYISNIYLIK(G)                                                                                                                                                                                  | enzyme | 1 |
| 2 | 8.59E+06 | Q09666 | AHNAK   | 0 |                                               | 9<br>(K)GEGPEVDVNLPK(A)<br>(K)IDVTAPDVSIEEPEGK(L)<br>(K)mDVNVGDIDIEGPEGK(L)<br>(K)VDIDTPDINIEGSEGK(F)<br>(K)VDIEAPDVSLEGPEGK(L)<br>(K)VDIEGPDVNIEGPEGK(L)<br>(K)VDVDVPDVNIEGPDAL(L)<br>(K)VDVEVPDVSLEGPEGK(L)<br>(K)VGVEVPDVNIEGPEGK(L) | other  | 0 |

|    |          |        |        |   |                                                                                                           |   |                                                    |                            |   |
|----|----------|--------|--------|---|-----------------------------------------------------------------------------------------------------------|---|----------------------------------------------------|----------------------------|---|
| 2  | 2.27E+06 | Q10570 | CPSF1  | 0 |                                                                                                           | 2 | (R)ISVLPAYLSYDAPWPVR(K)<br>(R)VLVDSSFGQPTTQGEAR(R) | other                      | 0 |
| 5  | 9.37E+06 | Q12860 | CNTN1  | 3 | (K)TDGAAPNVAPSDVGGGGGR(N)<br>(R)WLLNEFPVFITMDK(R)<br>(R)FVSQTNGNLYIANVEASDK(G)                            | 0 |                                                    | enzyme                     | 3 |
| 8  | 5.38E+06 | Q13724 | MOGS   | 4 | (R)LAGSLTQALESHAEGFR(E)<br>(K)YGSYNVFWTSNPGLPLITEMVK(S)<br>(K)VDPALFPPVPLFTAVPSR(S)<br>(R)SLAASSSFYGQR(N) | 0 |                                                    | enzyme                     | 2 |
| 10 | 3.35E+07 | Q14103 | HNRNPD | 3 | (K)MFIGGLSWDTTK(K)<br>(R)EYFGGFGEVESIELPMDNK(T)<br>(R)GFGFVLFK(E)                                         | 0 |                                                    | transcription<br>regulator | 0 |
| 4  | 3.79E+06 | Q14151 | SAFB2  | 2 | (K)SEPVKEESSELEQPFQDTSSVGPD(R)<br>(R)NLDtGGNKSVLMER(L)                                                    | 0 |                                                    | other                      | 0 |
| 5  | 5.41E+06 | Q14166 | TTLL12 | 2 | (R)DFAYGETDPLIR(K)<br>(R)SSPGQTPEEGAQALAEFAALHGPALR(A)                                                    | 0 |                                                    | other                      | 0 |
| 2  | 5.00E+06 | Q15155 | NOMO1  | 2 | (K)SSIDSEPALVLGPLK(S)<br>(R)DGENYVLLDSTLPR(S)                                                             | 0 |                                                    | other                      | 3 |
| 2  | 5.59E+06 | Q15424 | SAFB   | 1 | (K)SEPVKEESSELEQPFQDTSSVGPD(R)                                                                            | 0 |                                                    | other                      | 0 |
| 3  | 1.72E+07 | Q5BKZ1 | ZNF326 | 2 | (R)FGPYESYDSR(S)                                                                                          | 0 |                                                    | transcription              | 0 |

|    |          |        |        |   |                                                                                                                                     |   |                                                                                  |                            |   |
|----|----------|--------|--------|---|-------------------------------------------------------------------------------------------------------------------------------------|---|----------------------------------------------------------------------------------|----------------------------|---|
|    |          |        |        |   | (R)SGYGFNEPEQSR(F)                                                                                                                  |   |                                                                                  | regulator                  |   |
| 13 | 5.70E+07 | Q6NZI2 | PTRF   | 3 | (K)IIGAVDQIQLTQAQLEER(Q)<br>(K)ATEMVEVGADDDDEGGAER(G)<br>(R)QAEMEGAVQSIQGELSK(L)                                                    | 0 |                                                                                  | transcription<br>regulator | 2 |
| 5  | 5.39E+06 | Q6NZY4 | ZCCHC8 | 2 | (K)LGQPLLNNPQLSEGWEIPK(Y)<br>(K)DGTGGETEVGEIQNK(S)                                                                                  | 0 |                                                                                  | other                      | 0 |
| 5  | 2.78E+06 | Q6YHK3 | CD109  | 5 | (K)SNLIQQWLSQQSDLGVISK(T)<br>(K)TLTLPSLPLNSADEIYELR(V)<br>(K)GDVTLTFLPLSFWGK(K)<br>(K)DYIDGVYDNAEYAER(F)<br>(R)TNIQVTVTGPSSPSPVK(F) | 0 |                                                                                  | other                      | 4 |
| 2  | 7.31E+06 | Q86UP2 | KTN1   | 0 |                                                                                                                                     | 3 | (K)WLQDLQEENESLK(A)<br>(R)DAVSNTTNQLESK(Q)<br>(K)TQLLQDVQDENK(L)                 | other                      | 3 |
| 5  | 1.20E+06 | Q8N684 | CPSF7  | 0 |                                                                                                                                     | 1 | (K)AVSGASAGDYSDAIETLLTAIAVIK(Q)                                                  | other                      | 0 |
| 5  | 4.83E+07 | Q8WVM8 | SCFD1  | 0 |                                                                                                                                     | 2 | (K)SLLDIISDPDAGTPEDK(M)<br>(K)GSPFPEVAESVQQELESYR(A)                             | transporter                | 2 |
| 6  | 1.58E+07 | Q92598 | HSPH1  | 0 |                                                                                                                                     | 3 | (K)VLGTAFDPFLGGK(N)<br>(R)LLTETEDWLYEEGEDQAK(Q)<br>(R)RGPFELEAFYSDPQGVYPYPEAK(I) | other                      | 0 |

|   |          |        |         |   |  |   |                                                                                                                      |                            |   |
|---|----------|--------|---------|---|--|---|----------------------------------------------------------------------------------------------------------------------|----------------------------|---|
| 5 | 1.28E+07 | Q96RP9 | GFM1    | 0 |  | 2 | (K)GVQPLLDVLEYLPNPSEVQNYAILNK(E)<br>(K)VIGVLEPLDPEDYTK(L)                                                            | translation<br>regulator   | 1 |
| 8 | 7.93E+06 | Q99729 | HNRNPAB | 0 |  | 2 | (R)EYFGEFGEIEAIELPMDPK(L)<br>(R)GFGFILFK(D)                                                                          | enzyme                     | 0 |
| 2 | 9.17E+06 | Q9BQ39 | DDX50   | 0 |  | 1 | (K)EGAFSNFPISEETIK(L)                                                                                                | enzyme                     | 0 |
| 2 | 1.03E+06 | Q9BQG0 | MYBBP1A | 0 |  | 2 | (K)ATLQEILPEVLK(A)<br>(R)EAVSSAFFSLLQTLSTQFK(Q)                                                                      | transcription<br>regulator | 0 |
| 6 | 1.62E+07 | Q9BXW7 | CECR5   | 0 |  | 1 | (R)DLcFSPGLMEASHVVNDVNEAVQLVFR(K)                                                                                    | other                      | 0 |
| 4 | 4.53E+06 | Q9H0D6 | XRN2    | 0 |  | 2 | (R)AALEEVYPDLTPEETR(R)<br>(K)LmSDPDSSIIDFYPEDFAIDLNGK(K)                                                             | enzyme                     | 0 |
| 8 | 6.78E+06 | Q9NR30 | DDX21   | 0 |  | 4 | (K)TFSFAIPIEK(L)<br>(K)DSEDNPQTLLFSATcPHWVFNVA(K)<br>(K)EGAFSNFPISEETIK(L)<br>(K)TEEIAEEEETVFPK(A)                   | enzyme                     | 0 |
| 1 | 7.78E+06 | Q9NYU2 | UGGT1   | 0 |  | 2 | (K)LNIQPSEADYAVDIR(S)<br>(R)SPAIWVNNLEVDSR(Y)                                                                        | enzyme                     | 2 |
| 6 | 1.15E+07 | Q9NZM1 | MYOF    | 0 |  | 9 | (K)LEGALGADTTEDGDEK(S)<br>(R)LDAVNTLLAMAER(L)<br>(K)NLVDPFVEVSFAGK(K)<br>(R)VIVESASNIPK(T)<br>(R)DIVIEMEDTKPLLASK(L) | other                      | 3 |

|    |          |        |        |   |                                                                                          |   |                                                                                                    |             |   |
|----|----------|--------|--------|---|------------------------------------------------------------------------------------------|---|----------------------------------------------------------------------------------------------------|-------------|---|
|    |          |        |        |   |                                                                                          |   | (R)AEDIPQMDDAFSQTVK(E)<br>(R)IPAHQVLYSTSGENASGK(Y)<br>(K)GPVGTVSEAQLAR(R)<br>(K)NANPEWNQVVNLQIK(F) |             |   |
| 3  | 7.96E+05 | Q9P2E9 | RRBP1  | 0 |                                                                                          | 2 | (R)DAQDVQASQAEADQQQTR(L)<br>(K)SHVEDGDIAGAPASSPEAPAEQDPVQLK(T)                                     | transporter | 3 |
| 16 | 5.13E+06 | Q9UJZ1 | STOML2 | 0 |                                                                                          | 3 | (K)AEQINQAAGEASAVLAK(A)<br>(K)ASYGVEDPEYAVTQLAQTTMR(S)<br>(R)ESLNASIVDAINQAADcWGIR(C)              | other       | 2 |
| 6  | 1.82E+07 | Q9Y6N5 | SQRDL  | 0 |                                                                                          | 2 | (K)TAAAVAAQSGILDR(T)<br>(K)EGNAIFTFPNTPVK(C)                                                       | enzyme      | 0 |
| 3  | 8.81E+05 | P10253 | GAA    | 2 | (R)GAYTQVIFLAR(N)<br>(R)AGYIIPLQGPGLTTTESR(Q)                                            | 2 | (R)GAYTQVIFLAR(N)<br>(R)AGYIIPLQGPGLTTTESR(Q)                                                      | enzyme      | 2 |
| 5  | 1.55E+06 | P04264 | KRT1   | 3 | (R)FSScGGGGGSFGAGGGFGR(S)<br>(R)GFSSGSAAVSGGSR(R)<br>(R)GGGGGGYGSGGSSYSGGGSYSGGGGGGGR(G) | 3 | (R)MSGEcAPNVSVSVSTSHTTISGGGSR(G)<br>(R)NKLNDLEEALQQAK(E)<br>(R)NLDLDSIIAEVK(A)                     | other       | 2 |
| 14 | 6.11E+06 | P02794 | FTH1   | 3 | (K)mGAPESGLAEYLFDK(H)<br>(R)KmGAPESGLAEYLFDK(H)<br>(K)NVNQSLLELHK(L)                     | 3 | (K)mGAPESGLAEYLFDK(H)<br>(K)NVNQSLLELHK(L)                                                         | enzyme      | 0 |
| 0  | 1.13E+06 | P15924 | DSP    | 2 | (K)GFFDPNTEENLTYLQLK(E)<br>(K)AQQIHSQTSQQYPLYDLGLK(F)                                    | 2 | (K)GFFDPNTEENLTYLQLK(E)<br>(K)ENAAAYFQFFEEAQSTEAYLK(G)                                             | other       | 2 |
| 12 | 1.26E+06 | Q16658 | FSCN1  | 3 | (R)DVPWGVDSLITLAFQDQR(Y)                                                                 | 3 | (R)DVPWGVDSLITLAFQDQR(Y)                                                                           | other       | 0 |

|    |          |        |        |   |                                                                                    |   |                                                                              |                            |   |
|----|----------|--------|--------|---|------------------------------------------------------------------------------------|---|------------------------------------------------------------------------------|----------------------------|---|
|    |          |        |        |   | (K)VGKDELFALEQScAQVVLQAANER(N)<br>(R)SSYDVFQLEFNDGAYNIK(D)                         |   | (K)VGKDELFALEQScAQVVLQAANER(N)<br>(R)SSYDVFQLEFNDGAYNIK(D)                   |                            |   |
| 9  | 2.05E+06 | P68363 | TUBA1B | 3 | (R)AVFVDLEPTVIDEVR(T)<br>(K)DYEEVGADSADGEDEGEY(-)<br>(K)TIGGGDDSFNTFFSETGAGK(H)    | 3 | (K)TIGGGDDSFNTFFSETGAGK(H)<br>(R)FDGALNVDLTFEQTNLVPYPR(I)<br>(K)EIIDLVLDR(I) | other                      | 1 |
| 9  | 2.05E+06 | Q71U36 | TUBA1A | 3 | (R)AVFVDLEPTVIDEVR(T)<br>(K)DYEEVGADSADGEDEGEY(-)<br>(K)TIGGGDDSFNTFFSETGAGK(H)    | 3 | (K)TIGGGDDSFNTFFSETGAGK(H)<br>(R)FDGALNVDLTFEQTNLVPYPR(I)<br>(K)EIIDLVLDR(I) | other                      | 1 |
| 10 | 2.05E+06 | Q9BQE3 | TUBA1C | 3 | (R)AVFVDLEPTVIDEVR(T)<br>(K)DYEEVGADSADGEDEGEY(-)<br>(K)TIGGGDDSFNTFFSETGAGK(H)    | 3 | (K)TIGGGDDSFNTFFSETGAGK(H)<br>(R)FDGALNVDLTFEQTNLVPYPR(I)<br>(K)EIIDLVLDR(I) | other                      | 1 |
| 6  | 1.91E+06 | Q13748 | TUBA3C | 3 | (R)IHFPLATYAPVISA(EK)(A)<br>(R)AVFVDLEPTVIDEVR(T)<br>(K)AYHEQLSVAEITNACFEPANQMV(C) | 2 | (R)FDGALNVDLTFEQTNLVPYPR(I)<br>(R)IHFPLATYAPVISA(EK)(A)                      |                            | 1 |
| 6  | 1.91E+06 | Q6PEY2 | TUBA3E | 3 | (R)IHFPLATYAPVISA(EK)(A)<br>(R)AVFVDLEPTVIDEVR(T)<br>(K)AYHEQLSVAEITNACFEPANQMV(C) | 2 | (R)FDGALNVDLTFEQTNLVPYPR(I)<br>(R)IHFPLATYAPVISA(EK)(A)                      | other                      | 1 |
| 7  | 4.70E+06 | Q15019 | SEPT2  | 2 | (K)ASIPFSVVGSNQLIEAK(G)<br>(R)ILDEIEEHN(I)                                         | 2 | (K)ASIPFSVVGSNQLIEAK(G)<br>(R)ILDEIEEHN(I)                                   | enzyme                     | 2 |
| 17 | 1.88E+06 | O00151 | PDLIM1 | 3 | (R)VITNQYNNPAGLYSSENISNFNNALESK(T)<br>(R)SAmPFTASPASSTTAR(V)<br>(K)GcTDNLTLTVAR(S) | 3 | (R)LVGGKDFEQPLAISR(V)<br>(R)VTPPEGYEVVTVFPK(-)<br>(K)GcTDNLTLTVAR(S)         | transcription<br>regulator | 0 |
| 7  | 2.24E+06 | P04083 | ANXA1  | 2 | (K)TPAQFDAELR(A)<br>(R)SEDFGVNEDLADSDAR(A)                                         | 2 | (K)TPAQFDAELR(A)<br>(K)GVDEATIIDIILTK(R)                                     | other                      | 2 |

|    |          |        |       |    |                                                                                                                                                                                                                                                        |   |                                                                                                                                                                                                                          |        |   |
|----|----------|--------|-------|----|--------------------------------------------------------------------------------------------------------------------------------------------------------------------------------------------------------------------------------------------------------|---|--------------------------------------------------------------------------------------------------------------------------------------------------------------------------------------------------------------------------|--------|---|
| 4  | 3.65E+06 | P23142 | FBLN1 | 2  | (K)IIEVEEEQEDPYLNDR(C)<br>(K)SQETGDLGVGGLQETDK(I)                                                                                                                                                                                                      | 3 | (K)IIEVEEEQEDPYLNDR(C)<br>(K)TGYFFDGISRMCDV(N)<br>(K)SQETGDLGVGGLQETDK(I)                                                                                                                                                | other  | 1 |
| 8  | 7.75E+06 | Q92597 | NDRG1 | 2  | (K)SIIGmGTGAGAYILTR(F)<br>(K)ISGWTQALPDmVVSHLFGK(E)                                                                                                                                                                                                    | 2 | (K)SIIGmGTGAGAYILTR(F)<br>(K)ISGWTQALPDmVVSHLFGK(E)                                                                                                                                                                      | kinase | 2 |
| 28 | 1.84E+07 | P19961 | AMY2B | 10 | (K)AHFSISNSAEDPFIAHAESK(L)<br>(K)IAEYMNHLIDIGVAGFR(I)<br>(K)MAVGFMALHPYGFTR(V)<br>(K)NWGEGWGFMPSTR(A)<br>(K)TGSGDIENYNDATQVR(D)<br>(R)ALVFVDNHDNQR(G)<br>(R)DFPAVPYSGWDFNDGK(C)<br>(R)GHGAGGASILTFWDAR(L)<br>(R)LSGLLDLALGKDYVR(S)<br>(R)TSIVHLFEWR(W) | 9 | (K)AHFSISNSAEDPFIAHAESK(L)<br>(K)HmWPGDIK(A)<br>(K)IAEYMNHLIDIGVAGFR(I)<br>(K)MAVGFMALHPYGFTR(V)<br>(K)TGSGDIENYNDATQVR(D)<br>(R)ALVFVDNHDNQR(G)<br>(R)DFPAVPYSGWDFNDGK(C)<br>(R)GHGAGGASILTFWDAR(L)<br>(R)TSIVHLFEWR(W) | enzyme | 1 |
| 25 | 1.79E+07 | P04746 | AMY2A | 9  | (K)AHFSISNSAEDPFIAHAESK(L)<br>(K)IAEYMNHLIDIGVAGFR(I)<br>(K)MAVGFMALHPYGFTR(V)<br>(K)TGSGDIENYNDATQVR(D)<br>(R)ALVFVDNHDNQR(G)<br>(R)DFPAVPYSGWDFNDGK(C)<br>(R)GHGAGGASILTFWDAR(L)<br>(R)IYVDAVINHMcGNAVSAGTSSTcGSYFNPGSR(D)<br>(R)TSIVHLFEWR(W)       | 8 | (K)AHFSISNSAEDPFIAHAESK(L)<br>(K)IAEYMNHLIDIGVAGFR(I)<br>(K)MAVGFMALHPYGFTR(V)<br>(K)TGSGDIENYNDATQVR(D)<br>(R)ALVFVDNHDNQR(G)<br>(R)DFPAVPYSGWDFNDGK(C)<br>(R)GHGAGGASILTFWDAR(L)<br>(R)TSIVHLFEWR(W)                   | enzyme | 1 |
| 23 | 3.10E+07 | P23280 | CA6   | 6  | (K)SYDIAQDAPDGLAVLAFAVEVK(N)                                                                                                                                                                                                                           | 7 | (K)SYDIAQDAPDGLAVLAFAVEVK(N)                                                                                                                                                                                             | enzyme | 1 |

|    |          |        |       |   |                                                                                                                                                                                                                       |   |                                                                                                                                                              |       |   |
|----|----------|--------|-------|---|-----------------------------------------------------------------------------------------------------------------------------------------------------------------------------------------------------------------------|---|--------------------------------------------------------------------------------------------------------------------------------------------------------------|-------|---|
|    |          |        |       |   | (R)TTLTGLDVQDmLPR(N)<br>(R)HVIEIHIVHYNYSK(Y)<br>(K)IEEILDYLR(R)<br>(K)NYPENTYYSNFISHLANIK(Y)<br>(K)LENSLLDHR(N)                                                                                                       |   | (R)TTLTGLDVQDmLPR(N)<br>(R)HVIEIHIVHYNYSK(Y)<br>(K)IEEILDYLR(R)<br>(K)NYPENTYYSNFISHLANIK(Y)<br>(K)LENSLLDHR(N)<br>(R)VVESNFPNQEYTLG(S)                      |       |   |
| 36 | 6.18E+06 | P60709 | ACTB  | 8 | (K)SYELPDGQVITIGNER(F)<br>(R)TTGIVMDSGDGVTHTVPIYEGYALPHAILR(L)<br>(R)VAPEEHPVLLTEAPLNPK(A)<br>(K)DLYANTVLSGGTMYPGIADR(M)<br>(K)LcYVALDFEQEmATAASSSSLEK(S)<br>(K)EITALAPSTmK(I)<br>(K)DSYVGDEAQSK(R)<br>(R)DLTDYLmK(I) | 6 | (K)SYELPDGQVITIGNER(F)<br>(R)VAPEEHPVLLTEAPLNPK(A)<br>(K)DLYANTVLSGGTMYPGIADR(M)<br>(K)LcYVALDFEQEmATAASSSSLEK(S)<br>(K)DSYVGDEAQSK(R)<br>(R)DLTDYLmK(I)     | other | 1 |
| 31 | 9.79E+06 | Q07021 | C1QBP | 7 | (K)AFVDFLSDEIKEER(K)<br>(K)MSGGWELELNGTEAK(L)<br>(K)AFVDFLSDEIK(E)<br>(K)ALVLDcHYPEDEVGQEDEAESDIFSIR(E)<br>(K)ITVTFNINNSIPPTFDGEEEP(S)<br>(K)VEEQEPELTSTPNFVVEVIK(N)<br>(R)EVSFQSTGESEWK(D)                           | 6 | (K)AFVDFLSDEIKEER(K)<br>(K)MSGGWELELNGTEAK(L)<br>(K)ALVLDcHYPEDEVGQEDEAESDIFSIR(E)<br>(K)VEEQEPELTSTPNFVVEVIK(N)<br>(R)EVSFQSTGESEWK(D)<br>(K)AFVDFLSDEIK(E) | other | 1 |

|    |          |        |          |   |                                                                                                                                  |   |                                                                                                          |             |   |
|----|----------|--------|----------|---|----------------------------------------------------------------------------------------------------------------------------------|---|----------------------------------------------------------------------------------------------------------|-------------|---|
| 24 | 2.06E+06 | P08134 | RHOC     | 2 | (K)QVELALWDTAGQEDYDR(L)<br>(R)LRPLSYPD TDVILMcFSIDSPDSLENIPEK(W)                                                                 | 2 | (K)QVELALWDTAGQEDYDR(L)<br>(R)LRPLSYPD TDVILMcFSIDSPDSLENIPEK(W)                                         | enzyme      | 4 |
| 24 | 2.06E+06 | P61586 | RHOA     | 2 | (K)QVELALWDTAGQEDYDR(L)<br>(R)LRPLSYPD TDVILMcFSIDSPDSLENIPEK(W)                                                                 | 2 | (K)QVELALWDTAGQEDYDR(L)<br>(R)LRPLSYPD TDVILMcFSIDSPDSLENIPEK(W)                                         | enzyme      | 3 |
| 20 | 1.33E+06 | P04792 | HSPB1    | 2 | (R)VSLDVNHFADELTVK(T)<br>(R)KYTLPPGVDPTQVSSLSPEGLTVEAPMPK(L)                                                                     | 2 | (K)LATQSNEITIPVTFESR(A)<br>(R)LFDAQFGLPR(L)                                                              | other       | 1 |
| 13 | 3.07E+05 | P11766 | ADH5     | 3 | (K)AGDTVIPLYPQCCE(C)<br>(K)AHEVRIKIATAVCHTDAY(T)<br>(K)VDEFVTHNLSFDEI(N)                                                         | 3 | (K)AGDTVIPLYPQCCE(C)<br>(K)AHEVRIKIATAVCHTDAY(T)<br>(K)VDEFVTHNLSFDEI(N)                                 | enzyme      | 0 |
| 7  | 3.37E+05 | Q99536 | VAT1     | 2 | (R)EVAEAAATGEDASSPPPK(T)<br>(R)TWWNQFSVTALQLLQANR(A)                                                                             | 2 | (R)EVAEAAATGEDASSPPPK(T)<br>(R)TWWNQFSVTALQLLQANR(A)                                                     | transporter | 1 |
| 13 | 4.58E+05 | P02774 | GC       | 5 | (K)SCESNSPPFVHPGTAECCT(T)<br>(K)EYANQFMWEYSTNYGQAPL(S)<br>(K)CCESASEDCMAKELPEHT(V)<br>(K)RSDFASNCCSIN(S)<br>(S)LGECCDVEDSTTCF(N) | 4 | (K)SCESNSPPFVHPGTAECCT(T)<br>(K)EYANQFMWEYSTNYGQAPL(S)<br>(K)RSDFASNCCSIN(S)<br>(S)LGECCDVEDSTTCF(N)     | transporter | 1 |
| 12 | 4.43E+05 | P36952 | SERPINB5 | 3 | (K)SLNLSTEFISSTK(R)<br>(K)HIFSEDTSDFSGMSETK(G)<br>(K)DLTDGHFENILADN(S)                                                           | 4 | (K)SLNLSTEFISSTK(R)<br>(K)HIFSEDTSDFSGMSETK(G)<br>(K)DLTDGHFENILADN(S)<br>(K)VCLEITEDGGDSIEVPGA(R)       | other       | 1 |
| 34 | 2.87E+08 | P04406 | GAPDH    | 9 | (K)WGDAGAAYVVESTGVFTTMEK(A)<br>(K)LISWYDNEFGYSNR(V)<br>(K)LVINGNPITIFQER(D)<br>(K)LVINGNPITIFQERDPSK(I)                          | 8 | (K)LISWYDNEFGYSNR(V)<br>(K)LVINGNPITIFQER(D)<br>(K)LVINGNPITIFQERDPSK(I)<br>(K)RVIISAPSADAPMFVMGVNHEK(Y) | enzyme      | 2 |

|    |          |        |        |   |                                                                                                                                                                                                                                            |   |                                                                                                                                                                                                                                                                             |             |   |
|----|----------|--------|--------|---|--------------------------------------------------------------------------------------------------------------------------------------------------------------------------------------------------------------------------------------------|---|-----------------------------------------------------------------------------------------------------------------------------------------------------------------------------------------------------------------------------------------------------------------------------|-------------|---|
|    |          |        |        |   | (K)RVIISAPSADAPMFVMGVNHEK(Y)<br>(K)VIHDNFGIVEGLMTTVHAITATQK(T)<br>(K)WGDAGAEYVVESTGVFTTMEK(A)<br>(R)GALQNIIPASTGAAK(A)<br>(R)VIISAPSADAPMFVMGVNHEK(Y)                                                                                      |   | (K)VIHDNFGIVEGLMTTVHAITATQK(T)<br>(K)WGDAGAEYVVESTGVFTTMEK(A)<br>(R)GALQNIIPASTGAAK(A)<br>(R)VIISAPSADAPMFVMGVNHEK(Y)                                                                                                                                                       |             |   |
| 21 | 2.37E+07 | P06396 | GSN    | 8 | (K)AGALNSNDAFVLK(T)<br>(K)NWRDPDQTDGLGLSYLSSHIANVER(V)<br>(K)QTQVSVLPEGGETPLFK(Q)<br>(K)TPSAAYLWVG TGASEAEK(T)<br>(K)VSNGAGTMSVSLVADENPFAQGALK(S)<br>(R)AQPVQVAEGSEPDGFWEALGGK(A)<br>(R)DPDQTDGLGLSYLSSHIANVER(V)<br>(R)EVQGFESATFLGYFK(S) | 9 | (K)AGALNSNDAFVLK(T)<br>(K)NWRDPDQTDGLGLSYLSSHIANVER(V)<br>(K)QTQVSVLPEGGETPLFK(Q)<br>(K)TPSAAYLWVG TGASEAEK(T)<br>(K)VSNGAGTMSVSLVADENPFAQGALK(S)<br>(K)GRRVVRATEVPVSWESFNNGDC(F)I<br>(R)AQPVQVAEGSEPDGFWEALGGK(A)<br>(R)DPDQTDGLGLSYLSSHIANVER(V)<br>(R)EVQGFESATFLGYFK(S) | other       | 1 |
| 29 | 4.70E+06 | P21796 | VDAC1  | 8 | (K)TKSENGLEFTSSGSANTETTK(V)<br>(R)VTQSNFAVG YK(T)<br>(K)WNTDNTLGT EITVEDQLAR(G)<br>(K)VNNSSLIGLGYTQTLKPGIK(L)<br>(K)SENGLEFTSSGSANTETTK(V)<br>(K)LTFDSSFSPNTGK(K)<br>(K)LETAVNLAWTAGNSNTRFG(I)<br>(R)FGIAAKYQIDPDACF(S)                    | 6 | (K)TKSENGLEFTSSGSANTETTK(V)<br>(R)VTQSNFAVG YK(T)<br>(K)WNTDNTLGT EITVEDQLAR(G)<br>(K)VNNSSLIGLGYTQTLKPGIK(L)<br>(K)SENGLEFTSSGSANTETTK(V)<br>(K)LTFDSSFSPNTGK(K)                                                                                                           | ion channel | 2 |
| 6  | 7.84E+06 | P12109 | COL6A1 | 3 | (R)DAEEAISQTIDTIVDMIK(N)<br>(K)DVFD FIPGSDQLNVIScQGLAPSQGRPGLSLVK(E)<br>(R)LLLFSDGNSQGATPAAIEK(A)                                                                                                                                          | 3 | (R)DAEEAISQTIDTIVDMIK(N)<br>(K)DVFD FIPGSDQLNVIScQGLAPSQGRPGLSLVK(E)<br>(R)LLLFSDGNSQGATPAAIEK(A)                                                                                                                                                                           | other       | 1 |
| 11 | 2.59E+07 | P40926 | MDH2   | 3 | (K)VDFPQDQLTALTGR(I)                                                                                                                                                                                                                       | 2 | (K)VDFPQDQLTALTGR(I)                                                                                                                                                                                                                                                        | enzyme      | 1 |

|    |          |        |               |   |                                                                                          |   |                                                                                    |                          |   |
|----|----------|--------|---------------|---|------------------------------------------------------------------------------------------|---|------------------------------------------------------------------------------------|--------------------------|---|
|    |          |        |               |   | (K)AGAGSATLSmAYAGAR(F)<br>(R)ANTFVAELK(G)                                                |   | (R)ANTFVAELK(G)                                                                    |                          |   |
| 1  | 5.05E+06 | P12111 | COL6A3        | 2 | (K)NADPAEIQIVLSPAFILAAESLPK(I)<br>(K)LLTPITTLTSEQIQK(L)                                  | 3 | (K)NADPAEIQIVLSPAFILAAESLPK(I)<br>(R)VGVVQFSNDVFPEFYLK(T)<br>(K)LLTPITTLTSEQIQK(L) | other                    | 1 |
| 11 | 2.11E+07 | P51884 | LUM           | 2 | (K)NIPTVNENLENYLEVNQLEK(F)<br>(R)LPSGLPVSLTLYLDNNK(I)                                    | 2 | (K)NIPTVNENLENYLEVNQLEK(F)<br>(R)LPSGLPVSLTLYLDNNK(I)                              | other                    | 1 |
| 5  | 1.98E+07 | P07384 | CAPN1         | 2 | (R)TDIcQGALGDCWLLAAIASLTLDNLLHR(V)<br>(R)NYPATFWVNPQFK(I)                                | 2 | (R)TDIcQGALGDCWLLAAIASLTLDNLLHR(V)<br>(R)NYPATFWVNPQFK(I)                          | peptidase                | 2 |
| 20 | 4.60E+07 | P56537 | EIF6          | 3 | (R)QTVADQVLVGSYcVFSNQGGLVHPK(T)<br>(K)TSIEDQDESSLQVPLVAGTVNR(G)<br>(R)QTVADQVLVGSYCVF(S) | 2 | (R)QTVADQVLVGSYcVFSNQGGLVHPK(T)<br>(K)TSIEDQDESSLQVPLVAGTVNR(G)                    | translation<br>regulator | 1 |
| 9  | 2.59E+06 | P50395 | GDI2          | 2 | (K)SPYLYPLYGLGELPQGFAR(L)<br>(K)IYKVPSTEAEALASSLMGLFEK(R)                                | 2 | (K)SPYLYPLYGLGELPQGFAR(L)<br>(K)IYKVPSTEAEALASSLMGLFEK(R)                          | other                    | 1 |
| 6  | 8.73E+06 | P02675 | FGB           | 2 | (R)NSVDELNNNVEAVSQTSSSSFQYMYLLK(D)<br>(K)GGETSEmYLIQPDSSVKPYR(V)                         | 2 | (K)HQLYIDETVNSNIPTNLR(V)<br>(K)DNENVVNEYSSELEK(H)                                  | other                    | 3 |
| 3  | 8.86E+05 | P18206 | VCL           | 2 | (R)VDQLTAQLADLAAR(G)<br>(R)ALASQLQDSLK(D)                                                | 2 | (K)SLLDASEEAIKK(D)<br>(K)VAMANIQPQmLVAGATSIAR(R)                                   | enzyme                   | 3 |
| 9  | 1.55E+07 | P19971 | TYMP          | 2 | (R)DVTATVDSLPLITASILSK(K)<br>(R)DLVTTLGGALLWLSGHAGTQAQGAAR(V)                            | 2 | (R)DLVTTLGGALLWLSGHAGTQAQGAAR(V)<br>(R)DVTATVDSLPLITASILSK(K)                      | growth factor            | 1 |
| 4  | 3.93E+07 | P19652 | ORM1/OR<br>M2 | 3 | (K)WFYIASAFR(N)<br>(K)EQLGEFYALDCLCIPR(S)<br>(K)TEDTIFLREYQT(R)                          | 2 | (K)WFYIASAFR(N)<br>(K)TEDTIFLREYQT(R)                                              | other                    | 1 |
| 6  | 8.09E+06 | P35611 | ADD1          | 2 | (R)VNSEQEHFLIVPFGLLYSEVTASSLVK(I)<br>(R)TSTSAVPNLFVPLNTNPK(E)                            | 2 | (R)VNSEQEHFLIVPFGLLYSEVTASSLVK(I)<br>(R)TSTSAVPNLFVPLNTNPK(E)                      | other                    | 2 |

|    |          |        |         |   |                                                                                                  |   |                                                                      |                           |   |
|----|----------|--------|---------|---|--------------------------------------------------------------------------------------------------|---|----------------------------------------------------------------------|---------------------------|---|
| 9  | 7.13E+06 | P47756 | CAPZB   | 2 | (K)LEVEANNAFDQYR(D)<br>(K)YDPPLEDGAMP SAR(L)                                                     | 3 | (K)LEVEANNAFDQYR(D)<br>(K)YDPPLEDGAMP SAR(L)<br>(K)GCWDSIHVVEVQ(E)   | other                     | 0 |
| 13 | 3.00E+06 | P27105 | STOM    | 2 | (K)NSTIVFPLPIDMLQGIIGAK(H)<br>(R)VQ NATLAVANITNADSATR(L)                                         | 2 | (K)NSTIVFPLPIDMLQGIIGAK(H)<br>(R)VQ NATLAVANITNADSATR(L)             | other                     | 4 |
| 5  | 1.21E+07 | P00751 | CFB     | 2 | (K)EAGIPEFYDYDVALIK(L)<br>(R)LLQEGQALEYVcPSGFYPYPVQTR(T)                                         | 2 | (K)DISEVVT PR(F)<br>(K)EKLQDEDLGFL(-)                                | peptidase                 | 2 |
| 13 | 1.26E+07 | P04899 | GNAI2   | 3 | (K)ITHSPLTicFPEYTGANKYDEAASYIQSK(F)<br>(R)SREYQLNDSAAAYLNDLER(I)<br>(K)NILDRQDPPSVVVTSHQAPGE(K)  | 2 | (K)ITHSPLTicFPEYTGANKYDEAASYIQSK(F)<br>(R)SREYQLNDSAAAYLNDLER(I)     | enzyme                    | 3 |
| 10 | 4.30E+06 | P45880 | VDAC2   | 2 | (K)YQLDPTASISAK(V)<br>(K)VNNSSLIGVGYTQTLRPGVK(L)                                                 | 2 | (K)YQLDPTASISAK(V)<br>(K)VNNSSLIGVGYTQTLRPGVK(L)                     | ion channel               | 1 |
| 1  | 5.01E+06 | P02751 | FN1     | 2 | (R)NTFAEVTGLSPGVTYFYK(V)<br>(R)NLQPASEYTVSLVAIK(G)                                               | 2 | (R)NTFAEVTGLSPGVTYFYK(V)<br>(R)NLQPASEYTVSLVAIK(G)                   | enzyme                    | 1 |
| 12 | 3.81E+06 | P62873 | GNB1    | 2 | (R)VSclGVTDDGMAVATGSWDSFLK(I)<br>(R)KAcADATLSQITNNIDPVGR(I)                                      | 2 | (R)VSclGVTDDGMAVATGSWDSFLK(I)<br>(R)KAcADATLSQITNNIDPVGR(I)          | enzyme                    | 3 |
| 10 | 5.12E+06 | P07355 | ANXA2   | 2 | (R)RAEDGSVIDYELIDQDAR(D)<br>(K)GVDEVTIVNILTNR(S)                                                 | 2 | (K)SLYYYIQDQTK(G)<br>(K)LSLEGDHSTPPSAYGSVK(A)                        | other                     | 3 |
| 13 | 2.71E+07 | P01903 | HLA-DRA | 2 | (R)NGKPVTTGVSETVFLPR(E)<br>(R)FASFEAQGALANIAVDK(A)                                               | 2 | (R)FASFEAQGALANIAVDK(A)<br>(R)NGKPVTTGVSETVFLPR(E)                   | transmembrane<br>receptor | 5 |
| 13 | 3.80E+05 | P25311 | AZGP1   | 4 | (R)AGEVQEP E(LR)(G)<br>(R)QDPPSVVVTSHQAPGEK(K)<br>(R)YSLTYIYTGLSK(H)<br>(R)YSLTYIYTGLSKHVEDVP(A) | 3 | (R)AGEVQEP E(LR)(G)<br>(R)QDPPSVVVTSHQAPGEK(K)<br>(R)YSLTYIYTGLSK(H) | transporter               | 1 |
| 4  | 4.78E+06 | Q16853 | AOC3    | 3 | (K)SPVPPGPAPPLQFYPQGPR(F)                                                                        | 3 | (K)SPVPPGPAPPLQFYPQGPR(F)                                            | enzyme                    | 4 |

|    |          |        |          |   |                                                                                           |   |                                                                                           |                           |   |
|----|----------|--------|----------|---|-------------------------------------------------------------------------------------------|---|-------------------------------------------------------------------------------------------|---------------------------|---|
|    |          |        |          |   | (R)NLVTMTTAPR(G)<br>(R)EELTAVMR(F)                                                        |   | (R)NLVTMTTAPR(G)<br>(R)EELTAVMR(F)                                                        |                           |   |
| 16 | 3.39E+07 | P23528 | CFL1     | 2 | (K)EILVGDVGQTVDDPYATFVK(M)<br>(R)YALYDATYETK(E)                                           | 2 | (K)LGGSAVISLEGKPL(-)<br>(R)YALYDATYETK(E)                                                 | other                     | 1 |
| 9  | 2.06E+06 | P16930 | FAH      | 2 | (K)SFGTTVSPWVVPMDALMPFAVPNPK(Q)<br>(R)IGVAIGDQILDLSIIK(H)                                 | 2 | (K)SFGTTVSPWVVPMDALMPFAVPNPK(Q)<br>(R)IGVAIGDQILDLSIIK(H)                                 | enzyme                    | 0 |
| 19 | 1.60E+07 | P18510 | IL1RN    | 2 | (R)LQLEAVNITDLENR(K)<br>(K)IDVVPIEPHALFLGIHGGK(M)                                         | 2 | (R)LQLEAVNITDLENR(K)<br>(K)IDVVPIEPHALFLGIHGGK(M)                                         | cytokine                  | 2 |
| 3  | 9.74E+05 | P30501 | HLA-C    | 4 | (K)WAAVVVPSGEEQR(Y)<br>(R)FIAVGYVDDTQFVR(F)<br>(K)YNRQAQTDNRNL(R)<br>(K)WAAVVVPSGEEQRY(T) | 4 | (K)WAAVVVPSGEEQR(Y)<br>(R)FIAVGYVDDTQFVR(F)<br>(K)YNRQAQTDNRNL(R)<br>(K)WAAVVVPSGEEQRY(T) | transmembrane<br>receptor | 4 |
| 10 | 1.46E+06 | P00739 | HPR      | 3 | (R)TEGDGVYTLNNEK(Q)<br>(K)LRTEGDGVYTLNNEK(Q)<br>(R)TEGDGVYTLNDK(K)                        | 4 | (K)DIAPTLTYVGK(K)<br>(R)TEGDGVYTLNNEK(Q)<br>(K)LRTEGDGVYTLNNEK(Q)<br>(R)TEGDGVYTLNDK(K)   | peptidase                 | 1 |
| 12 | 2.96E+07 | P01009 | SERPINA1 | 3 | (K)LQHLENELTHDIITK(F)<br>(K)ITPNLAEFASFYR(Q)<br>(K)VFSNGADLSGVTEEAPLK(L)                  | 3 | (K)GTEAAGAMFLEAIPMSIPPEVK(F)<br>(K)SVLGQLGITK(V)<br>(K)VFSNGADLSGVTEEAPLK(L)              | other                     | 2 |
| 16 | 1.14E+07 | P02538 | KRT6A    | 6 | (R)ELQSQISDTSVVLSMDNSR(S)<br>(R)GMQDLVEDFK(N)<br>(R)NLDLDSIIAEVK(A)<br>(R)NMQDLVEDFK(N)   | 6 | (K)EYQELMNVK(L)<br>(K)LALDVEIATYR(K)<br>(K)LEAELGNMQGLVEDFK(N)<br>(K)LVSESSDVLPK(-)       | other                     | 1 |

|    |          |        |               |   |                                                                                                                |   |                                                                                                     |             |   |
|----|----------|--------|---------------|---|----------------------------------------------------------------------------------------------------------------|---|-----------------------------------------------------------------------------------------------------|-------------|---|
|    |          |        |               |   | (R)QLDSIVGER(G)<br>(R)QNLEPLFEQYINNLR(R)                                                                       |   | (K)NKLEGEDALQK(A)<br>(K)VDALmDEINFMK(M)                                                             |             |   |
| 6  | 1.07E+06 | P33121 | ACSL1         | 2 | (K)ATENTVNPcPDDTLISFLPLAHMFER(V)<br>(R)LMVTGAAPVSATVLTFLR(A)                                                   | 2 | (K)ATENTVNPcPDDTLISFLPLAHMFER(V)<br>(R)LMVTGAAPVSATVLTFLR(A)                                        | enzyme      | 2 |
| 12 | 9.24E+06 | P00387 | CYB5R3        | 2 | (R)APEAWDYGQGFVNEEmIR(D)<br>(K)SVGmIAGGTGITPmLQVIR(A)                                                          | 2 | (R)APEAWDYGQGFVNEEmIR(D)<br>(K)SVGmIAGGTGITPmLQVIR(A)                                               | enzyme      | 1 |
| 7  | 1.97E+06 | Q9UIV8 | SERPINB1<br>3 | 2 | (K)NNDLSMFVLLPNDIDGLEK(I)<br>(K)INSWVESKTNE(K)                                                                 | 2 | (K)NNDLSMFVLLPNDIDGLEK(I)<br>(K)INSWVESKTNE(K)                                                      | other       | 1 |
| 2  | 3.96E+06 | Q14315 | FLNC          | 3 | (R)APLQVAVLGPTGVAEPVEVR(D)<br>(R)VEESTQVGGDPFPVAVGDFLGR(E)<br>(R)GAGTGGLGLAIEGPSEAK(M)                         | 2 | (R)VEESTQVGGDPFPVAVGDFLGR(E)<br>(R)GAGTGGLGLAIEGPSEAK(M)                                            | other       | 2 |
| 4  | 5.07E+06 | P17858 | PFKL          | 2 | (R)GITNLcVIGDGS LTGANLFR(K)<br>(R)IMEVIDAITTTAQSHQR(T)                                                         | 2 | (K)AIGVLTSGGDAQGMNAAVR(A)<br>(R)IMEVIDAITTTAQSHQR(T)                                                | kinase      | 0 |
| 2  | 1.09E+05 | Q9BRQ8 | AIFM2         | 2 | (R)VNEHLQVEGHSNV(Y)<br>(K)GVQLLSERVSNLEELPLNEYREY(I)                                                           | 2 | (R)VNEHLQVEGHSNV(Y)<br>(K)GVQLLSERVSNLEELPLNEYREY(I)                                                | enzyme      | 2 |
| 8  | 7.43E+05 | P16615 | ATP2A2        | 4 | (K)TASEMVLADDNFSTIVA AVEEGR(A)<br>(R)VDQSILTGESVSVIK(H)<br>(K)DIVPGDIVEIAVGDKVPADIR(L)<br>(K)ISLPVILMDETLKF(V) | 3 | (K)TASEMVLADDNFSTIVA AVEEGR(A)<br>(R)VDQSILTGESVSVIK(H)<br>(K)DIVPGDIVEIAVGDKVPADIR(L)              | transporter | 2 |
| 2  | 2.37E+05 | Q13733 | ATP1A4        | 2 | (K)QAADMILLDDNFASIVTGVEEGR(L)<br>(K)VDNSSLTGESE PQSR(S)                                                        | 2 | (K)QAADMILLDDNFASIVTGVEEGR(L)<br>(K)VDNSSLTGESE PQSR(S)                                             | transporter | 4 |
| 6  | 2.61E+06 | P02730 | SLC4A1        | 4 | (R)ADFLEQPVLGFVR(L)<br>(R)LQEAAELEAVE LPVPIR(F)<br>(K)GLDLNGGPDDPLQQTGQLFGGLVR(D)<br>(R)VLLPLIFR(N)            | 4 | (R)ADFLEQPVLGFVR(L)<br>(R)LQEAAELEAVE LPVPIR(F)<br>(K)GLDLNGGPDDPLQQTGQLFGGLVR(D)<br>(R)VLLPLIFR(N) | transporter | 4 |

|    |          |        |          |   |                                                                                                                                                                  |   |                                                                                                                                                                                    |               |   |
|----|----------|--------|----------|---|------------------------------------------------------------------------------------------------------------------------------------------------------------------|---|------------------------------------------------------------------------------------------------------------------------------------------------------------------------------------|---------------|---|
| 10 | 1.46E+07 | P05155 | SERPING1 | 3 | (K)GVTSVSQIFHSPDLAIR(D)<br>(R)LEDMEQALSPSVFK(A)<br>(K)FQPTLLTLPR(I)                                                                                              | 4 | (K)GVTSVSQIFHSPDLAIR(D)<br>(R)LEDMEQALSPSVFK(A)<br>(K)TNLESILSYPK(D)<br>(K)FQPTLLTLPR(I)                                                                                           | other         | 1 |
| 7  | 1.25E+07 | P01019 | AGT      | 2 | (K)VLSALQAVQGLLVAQGR(A)<br>(K)QPFVQGLALYTPVVLPR(S)                                                                                                               | 2 | (K)VLSALQAVQGLLVAQGR(A)<br>(K)QPFVQGLALYTPVVLPR(S)                                                                                                                                 | growth factor | 1 |
| 6  | 3.81E+06 | P07585 | DCN      | 2 | (K)KASYSGVSLFSNPVQYWEIQPSTFR(C)<br>(K)ASYSGVSLFSNPVQYWEIQPSTFR(C)                                                                                                | 2 | (K)KASYSGVSLFSNPVQYWEIQPSTFR(C)<br>(K)ASYSGVSLFSNPVQYWEIQPSTFR(C)                                                                                                                  | other         | 1 |
| 7  | 1.04E+06 | P23141 | CES1     | 2 | (K)QEFGWLIPMQLMSYPLSEGQLDQK(T)<br>(R)ESQPLLGTVIDGMLLK(T)                                                                                                         | 2 | (K)QEFGWLIPMQLMSYPLSEGQLDQK(T)<br>(R)ESQPLLGTVIDGMLLK(T)                                                                                                                           | enzyme        | 1 |
| 24 | 2.54E+08 | P02790 | HPX      | 6 | (K)SGAQATWTELPWPHEK(V)<br>(K)SLGPNScSANGPGLYLIHGPNLYcYSDVEK(L)<br>(R)EWFWDLATGTMK(E)<br>(K)LLQDEFPGIPSLDAAVEcHR(G)<br>(R)GecQAEGVLFFQGDR(E)<br>(R)YYcFQGNQFLR(F) | 7 | (K)SGAQATWTELPWPHEK(V)<br>(K)SLGPNScSANGPGLYLIHGPNLYcYSDVEK(L)<br>(R)EWFWDLATGTMK(E)<br>(K)LLQDEFPGIPSLDAAVEcHR(G)<br>(R)GecQAEGVLFFQGDR(E)<br>(R)YYcFQGNQFLR(F)<br>(R)RLWWLDLK(S) | transporter   | 1 |
| 15 | 6.13E+06 | P01008 | SERPINC1 | 4 | (K)EQLQDMGLVDFLSPEK(S)<br>(R)EVPLNTIIFMGR(V)<br>(K)AFLEVNEEGSEAAASTAVVIAGR(S)<br>(K)NDNDNIFLSPLSISTAFAmTK(L)                                                     | 4 | (K)EQLQDMGLVDFLSPEK(S)<br>(R)EVPLNTIIFMGR(V)<br>(K)AFLEVNEEGSEAAASTAVVIAGR(S)<br>(K)NDNDNIFLSPLSISTAFAmTK(L)                                                                       | other         | 2 |
| 39 | 7.57E+06 | P02766 | TTR      | 3 | (K)AADDTWEPFASGK(T)<br>(R)GSPAINVAVHVFR(K)<br>(R)KAADDTWEPFASGK(T)                                                                                               | 3 | (K)TSESGELHGLTTEEFVEGIYK(V)<br>(R)GSPAINVAVHVFR(K)<br>(R)KAADDTWEPFASGK(T)                                                                                                         | transporter   | 1 |

|    |          |        |       |   |                                                                                     |   |                                                                                 |           |   |
|----|----------|--------|-------|---|-------------------------------------------------------------------------------------|---|---------------------------------------------------------------------------------|-----------|---|
| 6  | 5.72E+05 | P00505 | GOT2  | 2 | (K)ASAELALGENSEVLK(S)<br>(K)TcGFDFGTGAVEDISK(I)                                     | 2 | (K)ASAELALGENSEVLK(S)<br>(K)TcGFDFGTGAVEDISK(I)                                 | enzyme    | 2 |
| 6  | 1.63E+07 | P00918 | CA2   | 3 | (K)AVQQPDGLAVLGIFLK(V)<br>(K)GGPLDGTyrLIQFHFHWGS<br>(R)LIQFHFHWGSLDGQGSEHTVDKKKY(A) | 2 | (K)GGPLDGTyrLIQFHFHWGS<br>(R)LIQFHFHWGSLDGQGSEHTVDKKKY(A)                       | enzyme    | 0 |
| 9  | 9.98E+06 | P02689 | PMP2  | 2 | (K)LVSSNFDDYMK(E)<br>(K)SIVTLQRGSLNQVRWDG(K)<br>(R)KLGNLAKPTVIISKGDII(T)            | 2 | (K)LVSSNFDDYMK(E)<br>(K)SIVTLQRGSLNQVRWDG(K)                                    | other     | 0 |
| 4  | 1.66E+07 | P17655 | CAPN2 | 2 | (R)NYPNTFW/MNPQYLIK(L)<br>(R)LEIcNLTPDTLTSPTYK(K)                                   | 3 | (R)NYPNTFW/MNPQYLIK(L)<br>(R)LEIcNLTPDTLTSPTYK(K)<br>(K)LIRIRNPWGEVEW(T)        | peptidase | 2 |
| 23 | 2.01E+06 | P22392 | NME2  | 2 | (K)FMQASEDLLK(E)<br>(R)TFIAIKPDGVQR(G)                                              | 2 | (K)FMQASEDLLK(E)<br>(R)VMLGETNPADSKPGTIR(G)                                     | kinase    | 0 |
| 28 | 1.72E+07 | P00568 | AK1   | 3 | (K)ATEPVIAFYEK(R)<br>(K)GQLVPLETVLDMRL(D)<br>(K)IIFVVGPGSGK(G)                      | 3 | (K)ATEPVIAFYEK(R)<br>(R)IGQPTLLLYVDAGPETMTQR(L)<br>(K)VNAEGSVDSVFSQVcTHLDALK(-) | kinase    | 0 |
| 14 | 2.86E+05 | P61225 | RAP2B | 2 | (K)EIEVDSSPSVLEILDAGTEQFASMR(D)<br>(R)KEIEVDSSPSVLEILDAGTEQFASMR(D)                 | 2 | (K)EIEVDSSPSVLEILDAGTEQFASMR(D)<br>(R)KEIEVDSSPSVLEILDAGTEQFASMR(D)             | enzyme    | 2 |
| 2  | 5.00E+06 | Q5JPE7 | NOMO2 | 2 | (K)SSIDSEPALVLGPLK(S)<br>(R)DGENYVVLLDSTLPR(S)                                      | 0 |                                                                                 | other     | 3 |
