# Supplementary material
Source: PubMed Central journal article supplement (PMC3820938)
Supplement: supp_M112.025460_mcp.M112.025460-9.pdf [file supp_M112.025460_mcp.M112.025460-9.pdf]

**Table S5 List of the plasma membrane proteins which were differently expressed in HNSCC spheres compared with the adherent cultured cells**

| Protein ID | symbol   | fold change        | Type(s)                | membrane         |
|------------|----------|--------------------|------------------------|------------------|
|            |          | (spheres/adherent) |                        | prediction Score |
| P16070     | CD44     | 1.50211685         | other                  | 5                |
| P02786     | TFRC     | 1.50211685         | transporter            | 4                |
| P20020     | ATP2B1   | 1.50211685         | transporter            | 4                |
| P04844     | RPN2     | 1.50211685         | enzyme                 | 3                |
| P27824     | CANX     | 1.50211685         | other                  | 3                |
| Q07065     | CKAP4    | 1.50211685         | other                  | 3                |
| O15031     | PLXNB2   | 1.50211685         | other                  | 3                |
| P46940     | IQGAP1   | 1.50211685         | other                  | 2                |
| P35606     | COPB2    | 1.50211685         | transporter            | 1                |
| P54886     | ALDH18A1 | 1.50211685         | kinase                 | 1                |
| P02545     | LMNA     | 1.877646063        | other                  | 1                |
| P05023     | ATP1A1   | 2.002822467        | transporter            | 4                |
| P23229     | ITGA6    | 2.253175275        | other                  | 5                |
| P08195     | SLC3A2   | 2.253175275        | transporter            | 4                |
| P50993     | ATP1A2   | 2.253175275        | transporter            | 4                |
| P15311     | EZR      | 2.253175275        | other                  | 3                |
| P16144     | ITGB4    | 2.628704488        | transmembrane receptor | 4                |
| P00533     | EGFR     | 3.0042337          | kinase                 | 5                |

---

|        |          |           |                         |   |
|--------|----------|-----------|-------------------------|---|
| P17301 | ITGA2    | 3.0042337 | other                   | 5 |
| P13637 | ATP1A3   | 3.0042337 | transporter             | 4 |
| Q13740 | ALCAM    | 3.0042337 | other                   | 4 |
| P35221 | CTNNA1   | 3.0042337 | other                   | 3 |
| P10586 | PTPRF    | *         | phosphatase             | 5 |
| P35613 | BSG      | *         | transporter             | 5 |
| Q14126 | DSG2     | *         | other                   | 5 |
| Q9BY67 | CADM1    | *         | other                   | 5 |
| P13591 | NCAM1    | *         | other                   | 4 |
| P20648 | ATP4A    | *         | transporter             | 4 |
| P21589 | NT5E     | *         | phosphatase             | 4 |
| Q6YHK3 | CD109    | *         | other                   | 4 |
| O43491 | EPB41L2  | *         | other                   | 3 |
| P26038 | MSN      | *         | other                   | 3 |
| Q01518 | CAP1     | *         | other                   | 3 |
| Q13308 | PTK7     | *         | kinase                  | 3 |
| Q14956 | GPNMB    | *         | enzyme                  | 3 |
| Q12860 | CNTN1    | *         | enzyme                  | 3 |
| Q15155 | NOMO1    | *         | other                   | 3 |
| O15085 | ARHGEF11 | *         | other                   | 2 |
| P06733 | ENO1     | *         | transcription regulator | 2 |
| P08865 | RPSA     | *         | translation regulator   | 2 |

---

---

|        |         |   |                         |   |
|--------|---------|---|-------------------------|---|
| P25705 | ATP5A1  | * | transporter             | 2 |
| P35241 | RDX     | * | other                   | 2 |
| Q15046 | KARS    | * | enzyme                  | 2 |
| Q5T4S7 | UBR4    | * | other                   | 2 |
| Q9NZI8 | IGF2BP1 | * | translation regulator   | 2 |
| Q13724 | MOGS    | * | enzyme                  | 2 |
| Q6NZI2 | PTRF    | * | transcription regulator | 2 |
| P06744 | GPI     | * | enzyme                  | 2 |
| Q13751 | LAMB3   | * | transporter             | 2 |
| Q9UI47 | CTNNA3  | * | other                   | 2 |
| P12532 |         | * |                         | 1 |
| P13797 | PLS3    | * | other                   | 1 |
| P17987 | TCP1    | * | other                   | 1 |
| P31040 | SDHA    | * | enzyme                  | 1 |
| P36957 | DLST    | * | enzyme                  | 1 |
| P61163 | ACTR1A  | * | other                   | 1 |
| Q12996 | CSTF3   | * | other                   | 1 |
| Q15436 | SEC23A  | * | transporter             | 1 |
| Q7Z6Z7 | HUWE1   | * | transcription regulator | 1 |
| Q86WB0 | ZC3HC1  | * | other                   | 1 |
| Q8NC51 | SERBP1  | * | other                   | 1 |
| Q96QK1 | VPS35   | * | transporter             | 1 |

---

---

|        |          |   |                         |   |
|--------|----------|---|-------------------------|---|
| P29508 | SERPINB3 | * | other                   | 1 |
| P69849 |          | * | other                   | 2 |
| Q5JPE7 | NOMO2    | * | other                   | 3 |
| P12830 | CDH1     | 0 | other                   | 5 |
| O75923 | DYSF     | 0 | other                   | 4 |
| P23219 | PTGS1    | 0 | enzyme                  | 3 |
| Q86UP2 | KTN1     | 0 | other                   | 3 |
| Q9NZM1 | MYOF     | 0 | other                   | 3 |
| Q9P2E9 | RRBP1    | 0 | transporter             | 3 |
| P14923 | JUP      | 0 | other                   | 3 |
| P29966 | MARCKS   | 0 | other                   | 3 |
| O00116 | AGPS     | 0 | enzyme                  | 2 |
| O60488 | ACSL4    | 0 | enzyme                  | 2 |
| O60716 | CTNND1   | 0 | other                   | 2 |
| O75694 | NUP155   | 0 | transporter             | 2 |
| O95573 | ACSL3    | 0 | enzyme                  | 2 |
| P04040 | CAT      | 0 | enzyme                  | 2 |
| P04843 | RPN1     | 0 | enzyme                  | 2 |
| P07237 | P4HB     | 0 | enzyme                  | 2 |
| P35222 | CTNNB1   | 0 | transcription regulator | 2 |
| P49368 | CCT3     | 0 | other                   | 2 |
| Q8WVM8 | SCFD1    | 0 | transporter             | 2 |

---

---

|        |          |             |                       |   |
|--------|----------|-------------|-----------------------|---|
| Q9NYU2 | UGGT1    | 0           | enzyme                | 2 |
| P50454 | SERPINH1 | 0           | other                 | 2 |
| Q9UJZ1 | STOML2   | 0           | other                 | 2 |
| P07900 | HSP90AA1 | 0           | enzyme                | 1 |
| O00469 | PLOD2    | 0           | enzyme                | 1 |
| O60568 | PLOD3    | 0           | enzyme                | 1 |
| O95831 | AIFM1    | 0           | enzyme                | 1 |
| P12270 | TPR      | 0           | other                 | 1 |
| P13667 | PDIA4    | 0           | enzyme                | 1 |
| P34897 | SHMT2    | 0           | enzyme                | 1 |
| P38606 | ATP6V1A  | 0           | transporter           | 1 |
| P43304 | GPD2     | 0           | enzyme                | 1 |
| P48449 | LSS      | 0           | enzyme                | 1 |
| Q01970 | PLCB3    | 0           | enzyme                | 1 |
| Q02809 | PLOD1    | 0           | enzyme                | 1 |
| Q96RP9 | GFMI     | 0           | translation regulator | 1 |
| Q15149 | PLEC     | 0.170695097 | other                 | 1 |
| Q16891 | IMMT     | 0.250352808 | other                 | 1 |
| Q14247 | CTTN     | 0.281646909 | other                 | 2 |
| Q9BSJ8 | ESYT1    | 0.375529213 | other                 | 2 |
| P48741 | HSPA7    | 0.375529213 | other                 | 1 |
| P42704 | LRPPRC   | 0.417254681 | other                 | 1 |

---

---

|        |             |             |             |   |
|--------|-------------|-------------|-------------|---|
| Q15084 | PDIA6       | 0.450635055 | enzyme      | 2 |
| P14618 | PKM2        | 0.450635055 | kinase      | 1 |
| P54652 | HSPA2       | 0.450635055 | other       | 1 |
| P17655 | CAPN2       | 0.500705617 | peptidase   | 2 |
| A5A3E0 | POTEE/POTEF | 0.500705617 | other       | 1 |
| P17066 | HSPA6       | 0.500705617 | other       | 1 |
| P23142 | FBLN1       | 0.500705617 | other       | 1 |
| P12111 | COL6A3      | 0.500705617 | other       | 1 |
| Q00610 | CLTC        | 0.563293819 | other       | 3 |
| P11142 | HSPA8       | 0.563293819 | enzyme      | 1 |
| P36952 | SERPINB5    | 0.563293819 | other       | 1 |
| P00739 | HPR         | 0.563293819 | peptidase   | 1 |
| P05155 | SERPING1    | 0.563293819 | other       | 1 |
| P23280 | CA6         | 0.643764364 | enzyme      | 1 |
| P02790 | HPX         | 0.643764364 | transporter | 1 |
| Q9Y4L1 | HYOU1       | 0.667607489 | other       | 1 |
| P06396 | GSN         | 0.667607489 | other       | 1 |

---

\* indicated that the protein has only been identified in spheres. 0 indicated that the protein has only been identified in adherent cultured cells
