# Supplementary material
Source: PubMed Central journal article supplement (PMC3820938)
Supplement: supp_M112.025460_mcp.M112.025460-10.pdf [file supp_M112.025460_mcp.M112.025460-10.pdf]

**Table S6 Cox proportional hazards regression models in estimating overall survival**

| Characteristics                  | Sig.         | HR    | 95.0% CI |       |
|----------------------------------|--------------|-------|----------|-------|
| <b>Univariate analysis</b>       |              |       |          |       |
| CD44 expression(<=90% vs >90% )  | 0.085        | 1.94  | 0.913    | 4.122 |
| CD166 expression(<=90% vs >90% ) | <b>0.046</b> | 2.119 | 1.015    | 4.424 |
| Differentiation                  | <b>0.02</b>  | 1.735 | 1.09     | 2.761 |
| TNM                              | <b>0.036</b> | 1.594 | 1.032    | 2.462 |
| Lymph                            | <b>0.003</b> | 2.915 | 1.434    | 5.928 |
| Smoking                          | 0.116        | 1.418 | 0.917    | 2.194 |
| Drinking                         | 0.27         | 1.269 | 0.831    | 1.938 |
| Sex                              | 0.165        | 0.594 | 0.284    | 1.239 |
| Site                             | 0.97         | 0.992 | 0.638    | 1.542 |
| Age                              | 0.333        | 0.808 | 0.525    | 1.244 |
| <b>Multivariable analysis</b>    |              |       |          |       |
| CD166 expression(<=90% vs >90% ) | <b>0.044</b> | 2.14  | 1.019    | 4.492 |
| differentiation                  | <b>0.012</b> | 1.869 | 1.147    | 3.045 |
| lymph                            | <b>0.007</b> | 2.952 | 1.353    | 6.443 |
| TNM                              | 0.408        | 1.24  | 0.745    | 2.064 |
