# Supplementary material
Source: PubMed Central journal article supplement (PMC3820938)
Supplement: supp_M112.025460_mcp.M112.025460-11.pdf [file supp_M112.025460_mcp.M112.025460-11.pdf]

**Table S7 Expression of CD166 and CD44 in the primary and recurrent HNSCC tissues**

| <b>CD166</b> | <b>Primary</b> | <b>Recurrent</b> |       | <b>Sig.</b>       |
|--------------|----------------|------------------|-------|-------------------|
| -            | 52             | 18               | 0.018 | (Chi-square test) |
| +            | 16             | 18               |       |                   |

Note: "-" positive rate $\leq$ 50%; "+" positive rate $>$ 50%
