# Supplementary material
Source: PubMed Central journal article supplement (PMC3820938)

Figure S1

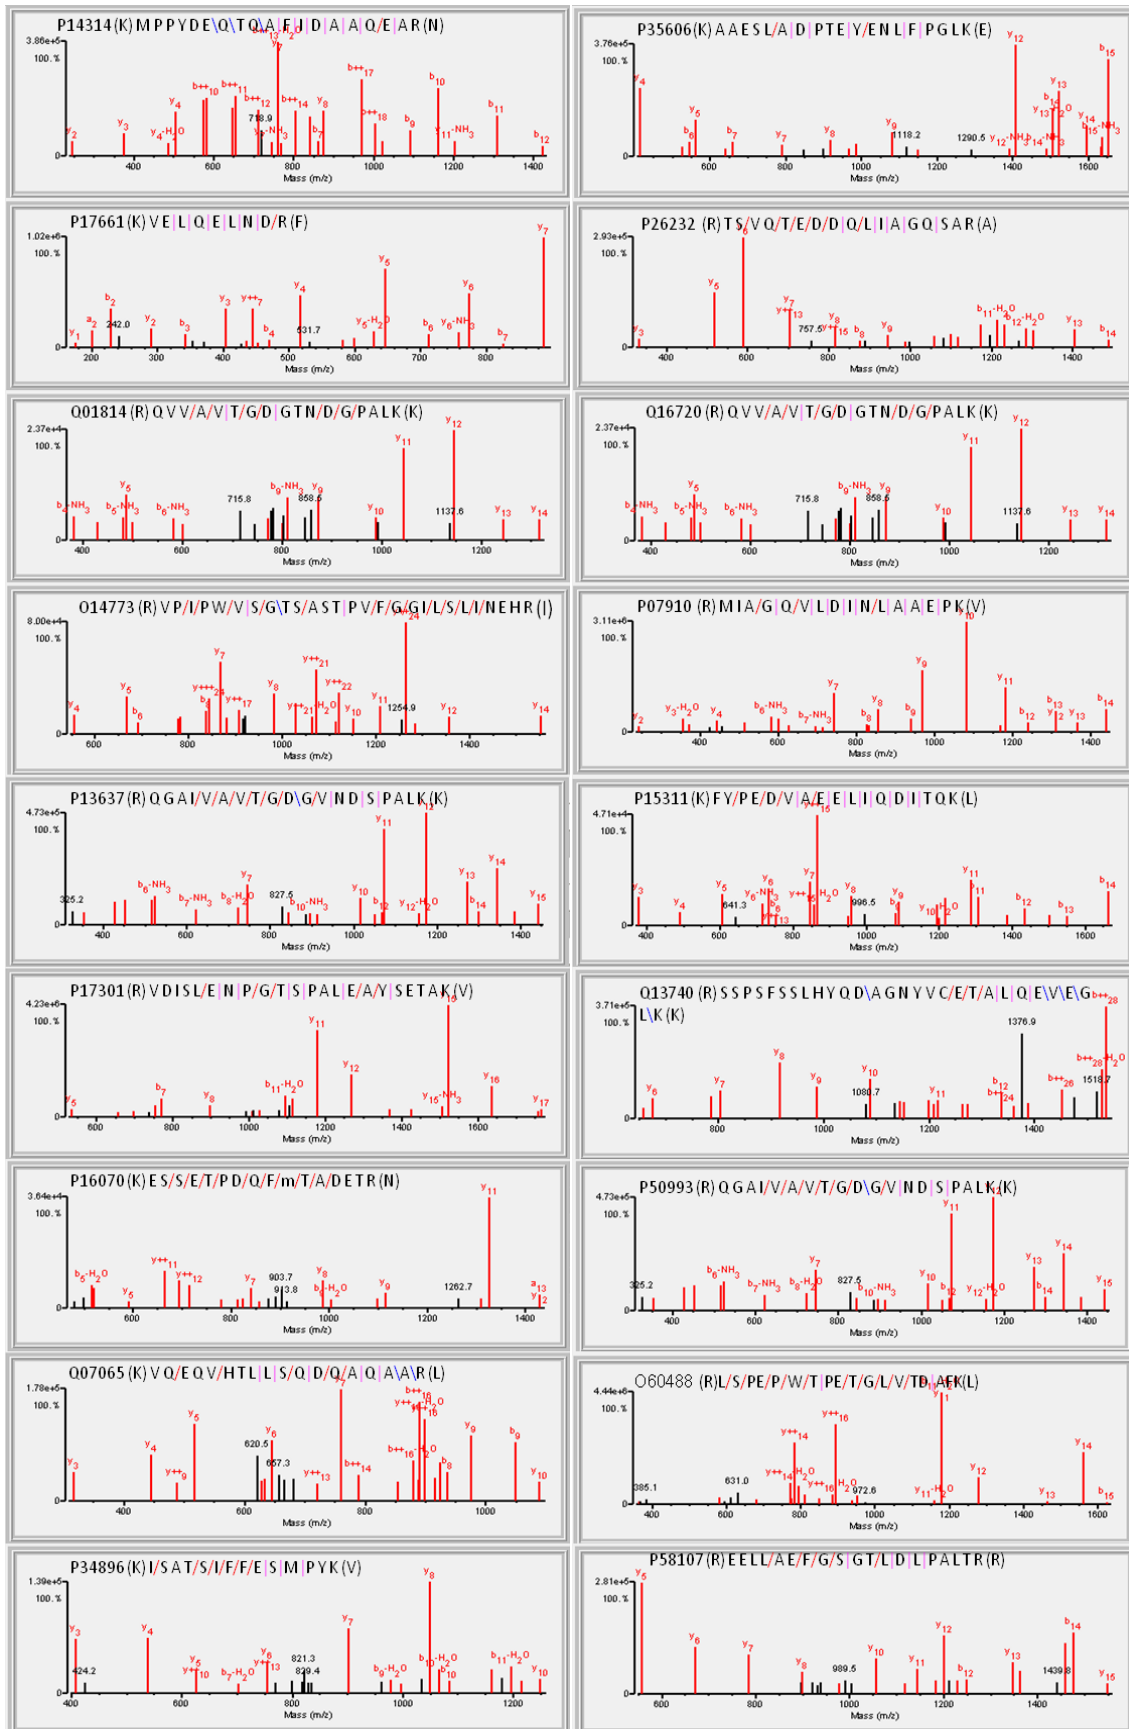

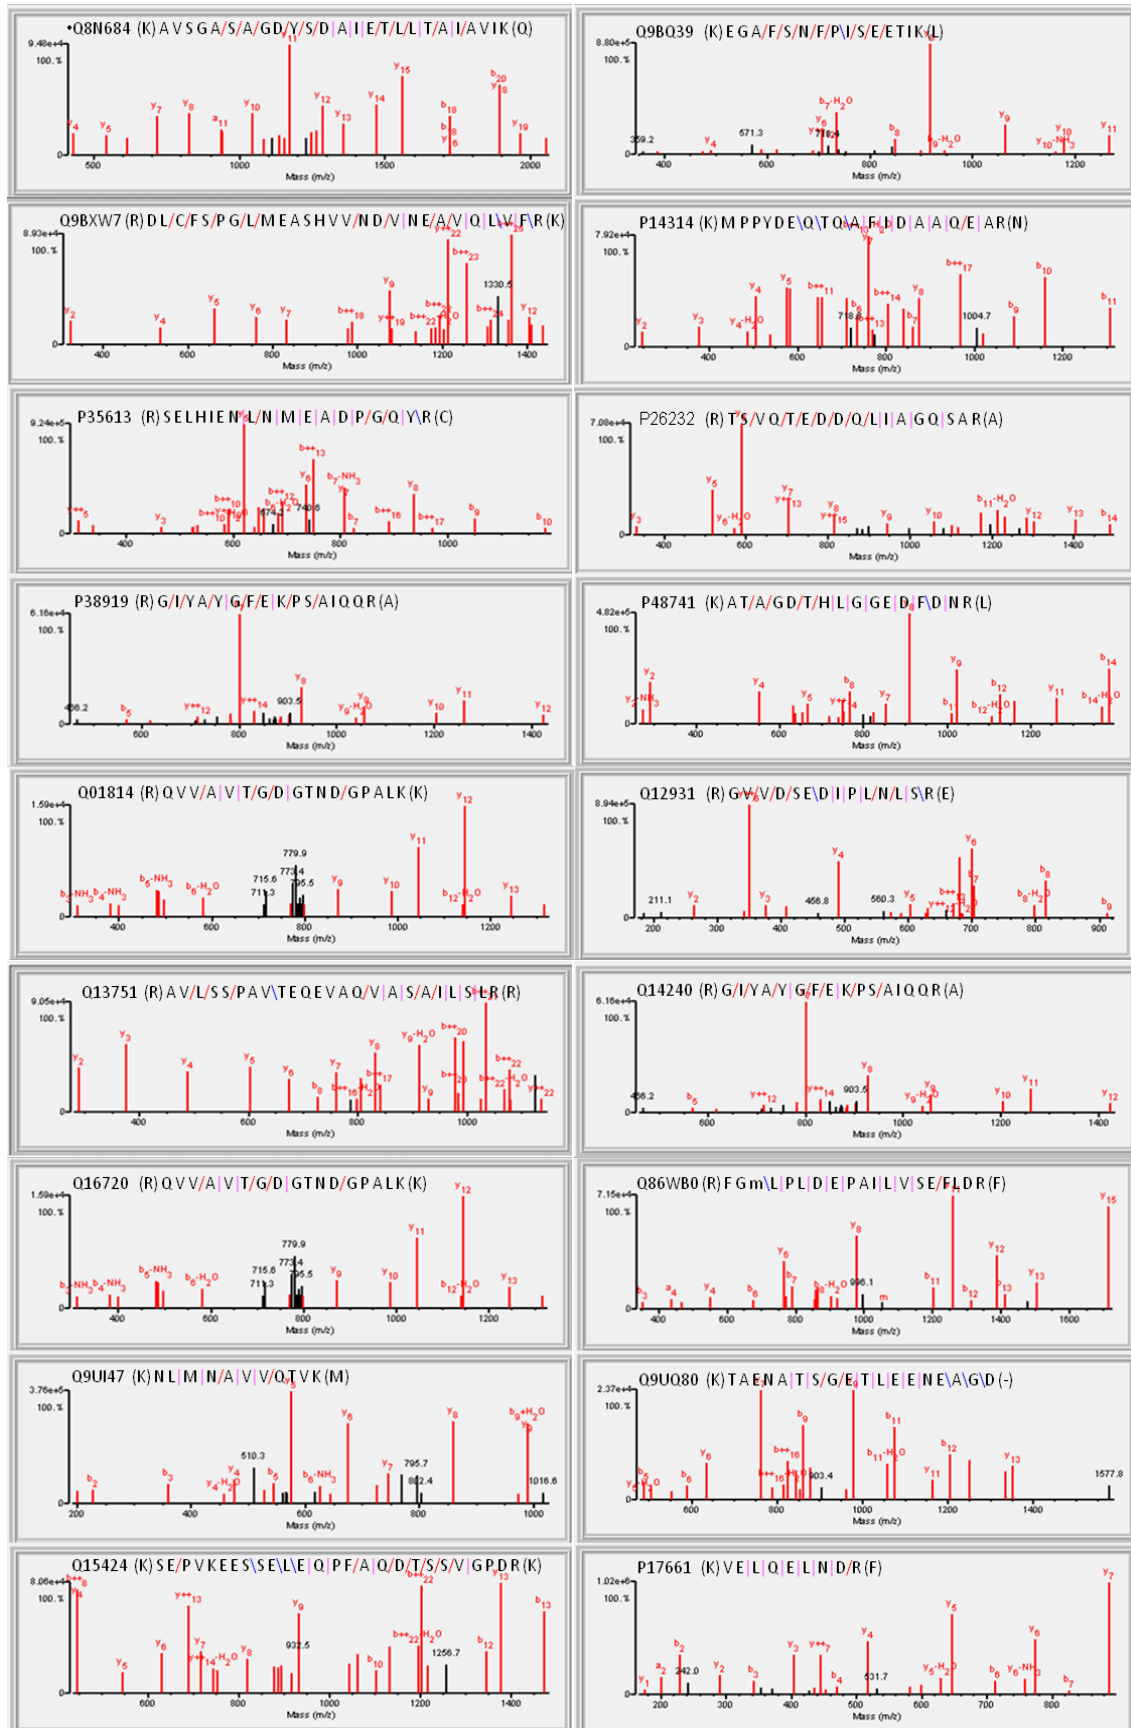

Figure S1. MS/MS spectra for all proteins identified on the basis of single peptide

Supplement: supp_M112.025460_mcp.M112.025460-1.pdf [file supp_M112.025460_mcp.M112.025460-1.pdf]
